# Supplementary material for: Human-Specific Histone Methylation Signatures at Transcription Start Sites in Prefrontal Neurons
Source: PLoS Biol. 2012 Nov 20;10(11):e1001427. doi: 10.1371/journal.pbio.1001427 (PMC3502543; doi:10.1371/journal.pbio.1001427)

**Supplementary Figure 1 (Shulha et al):**

UCSC genome browser tracks showing for each human-specific H3K4me3 peak the tag densities (y-axis, range 0-15 parts per million) for 11 human NeuN+ (green), 2 human NeuN- (red), 3 macaque NeuN+ (black) and 4 chimpanzee NeuN+ (blue) samples; non-human samples mapped both to HG19 and to their appropriate reference genome (macaque, rheMac2; chimpanzee, panTro2) as indicated.

*PDE4DIP**Known EST*

Mapped to HG19

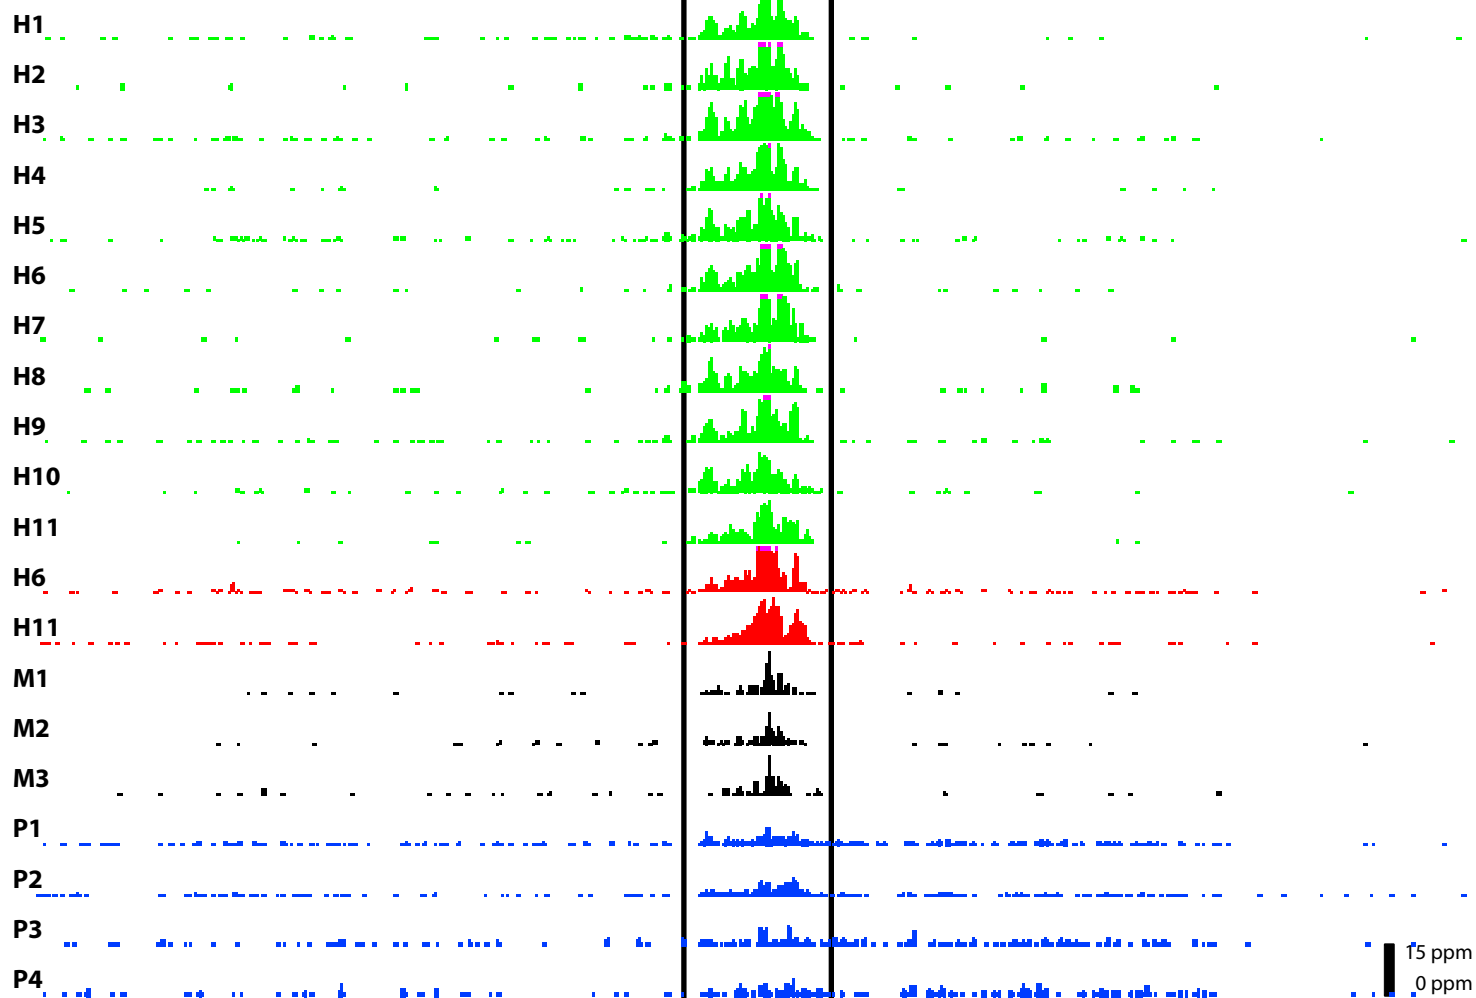

Mapped to RM2

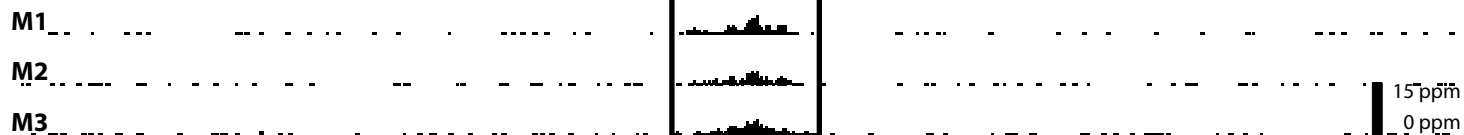

Mapped to PT2

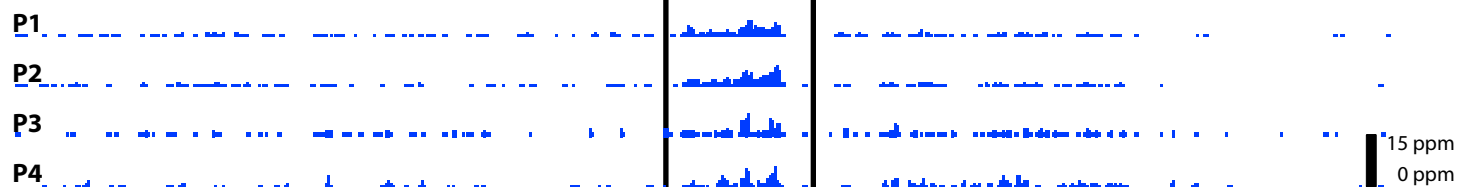

Known EST

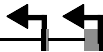

Mapped to HG19

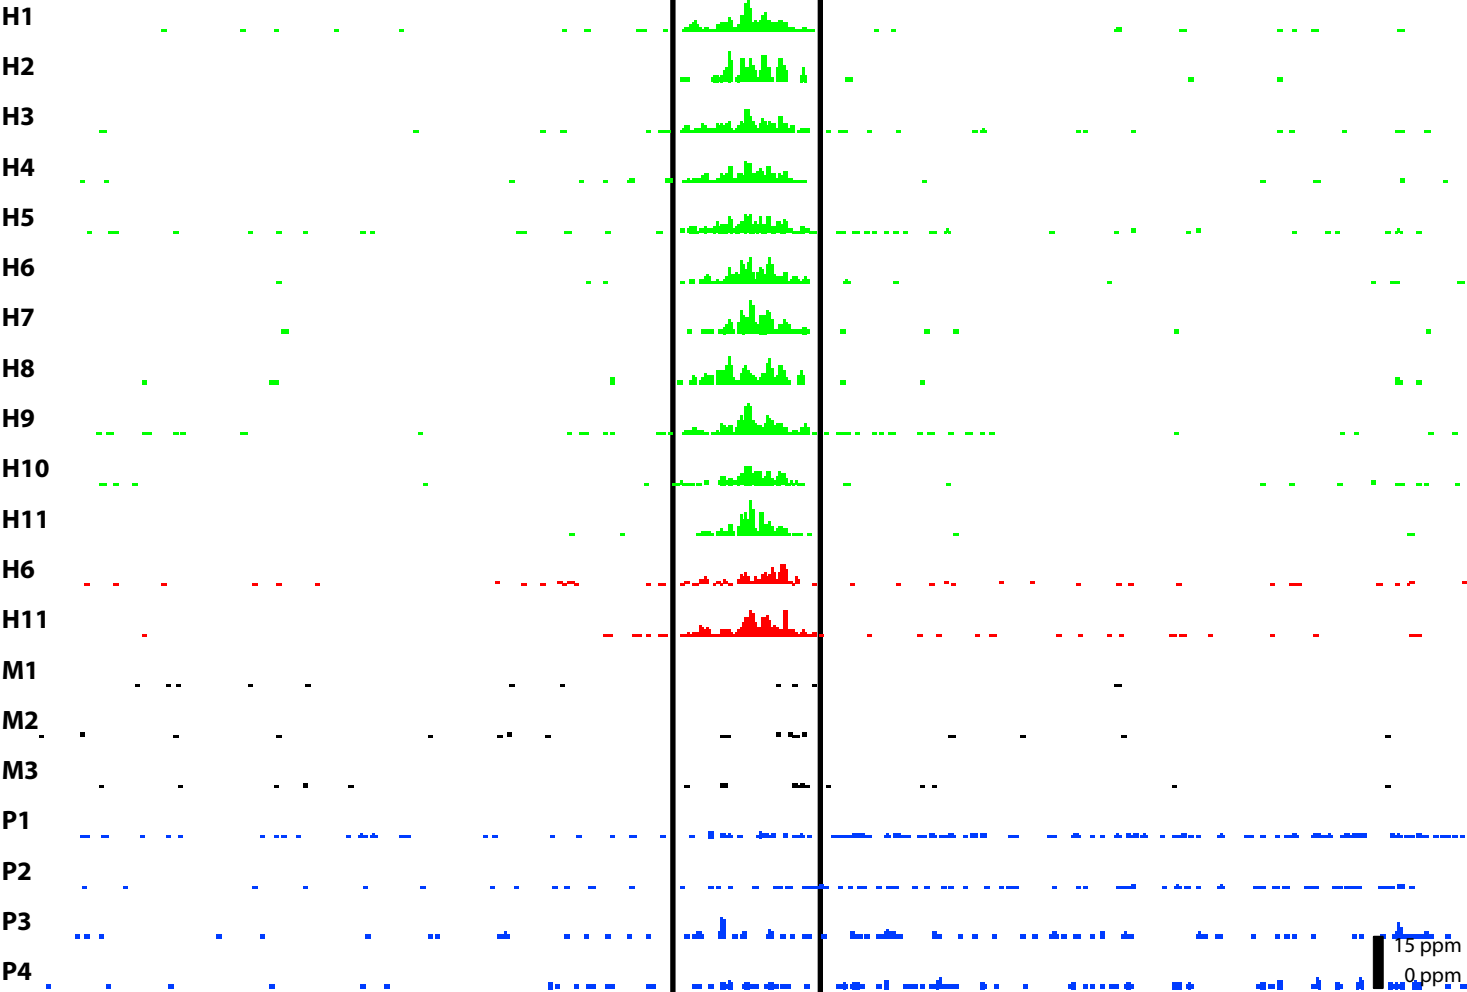

Mapped to RM2

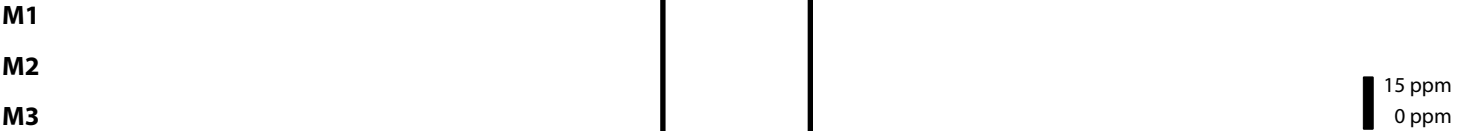

Mapped to PT2

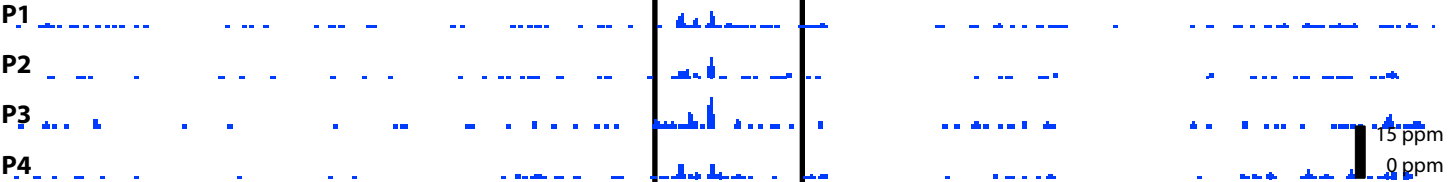

DPP10

Known EST

Mapped to HG19

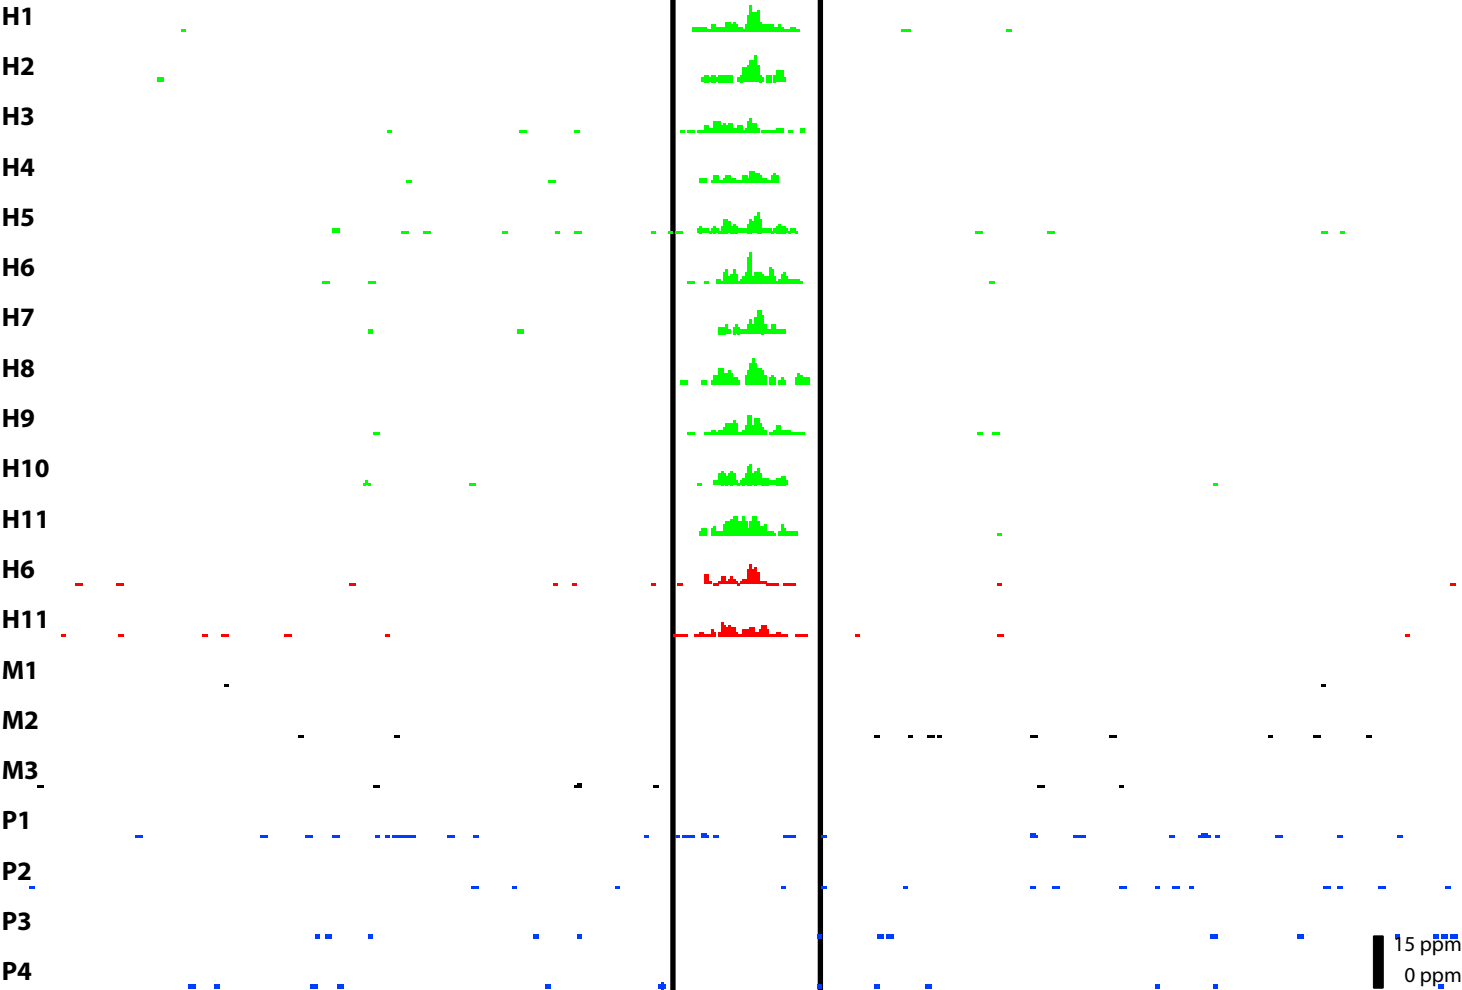

Mapped to RM2

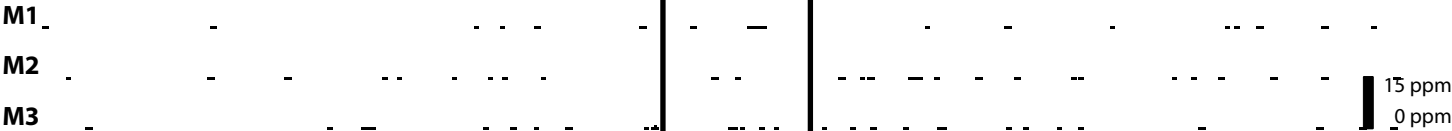

Mapped to PT2

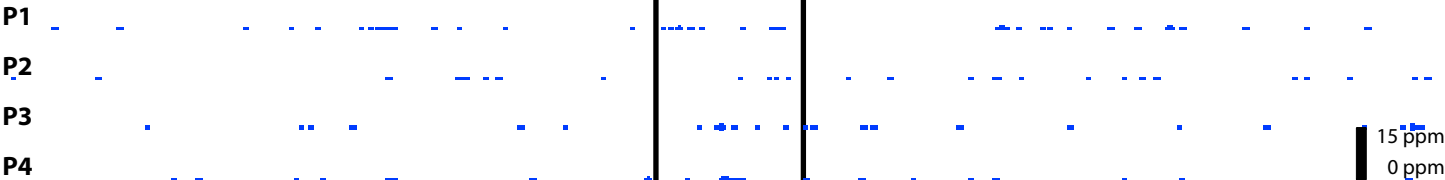

DPP10 LOC389023 DPP10

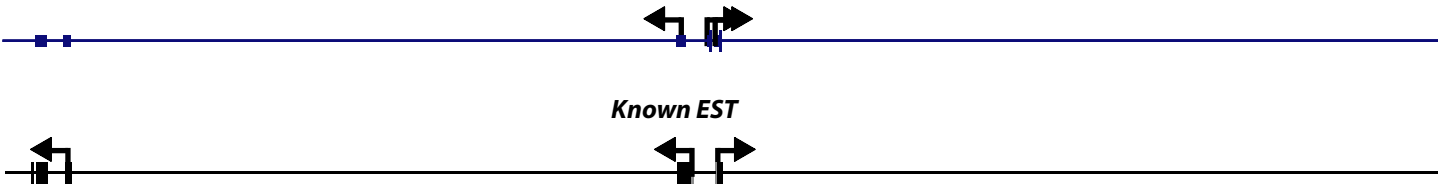

Mapped to HG19

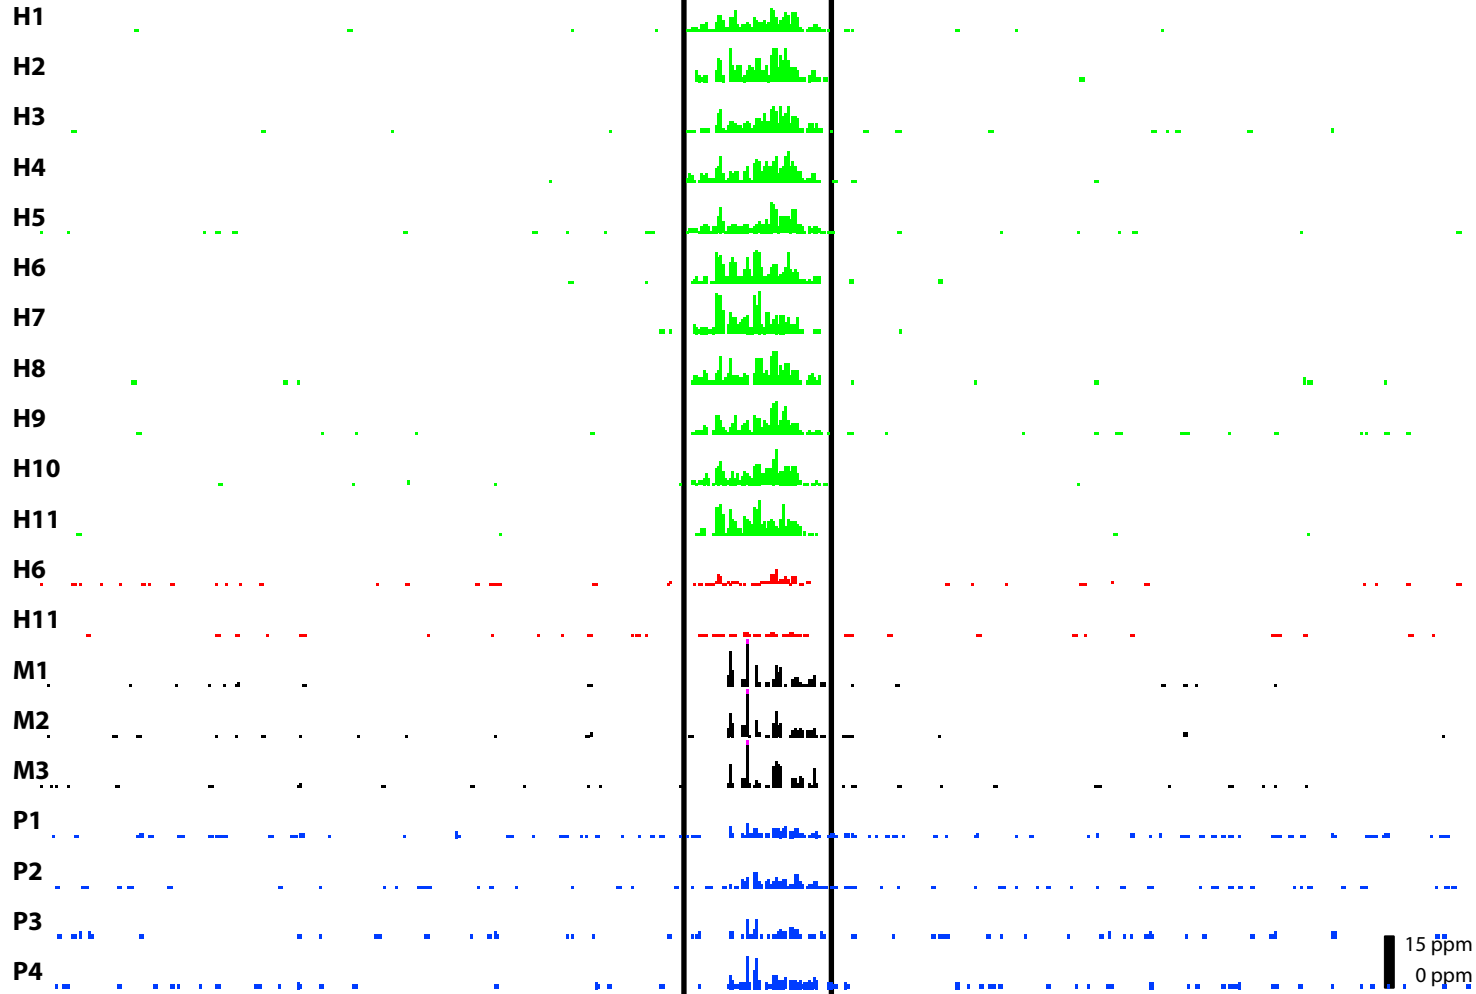

Mapped to RM2

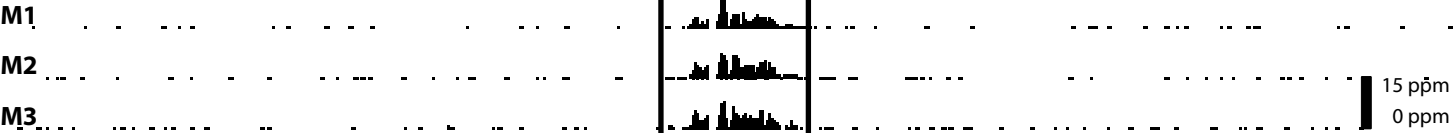

Mapped to PT2

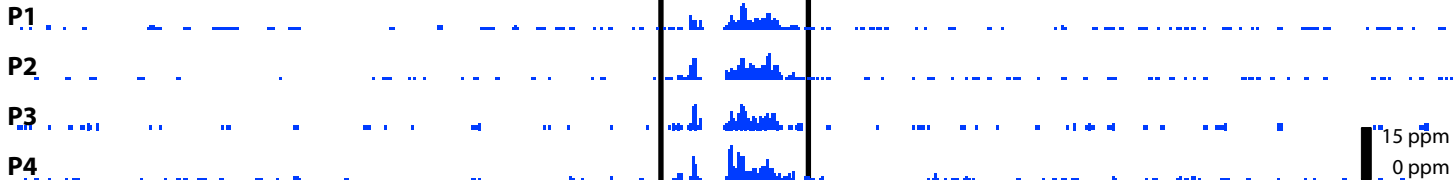

Known EST

Mapped to HG19

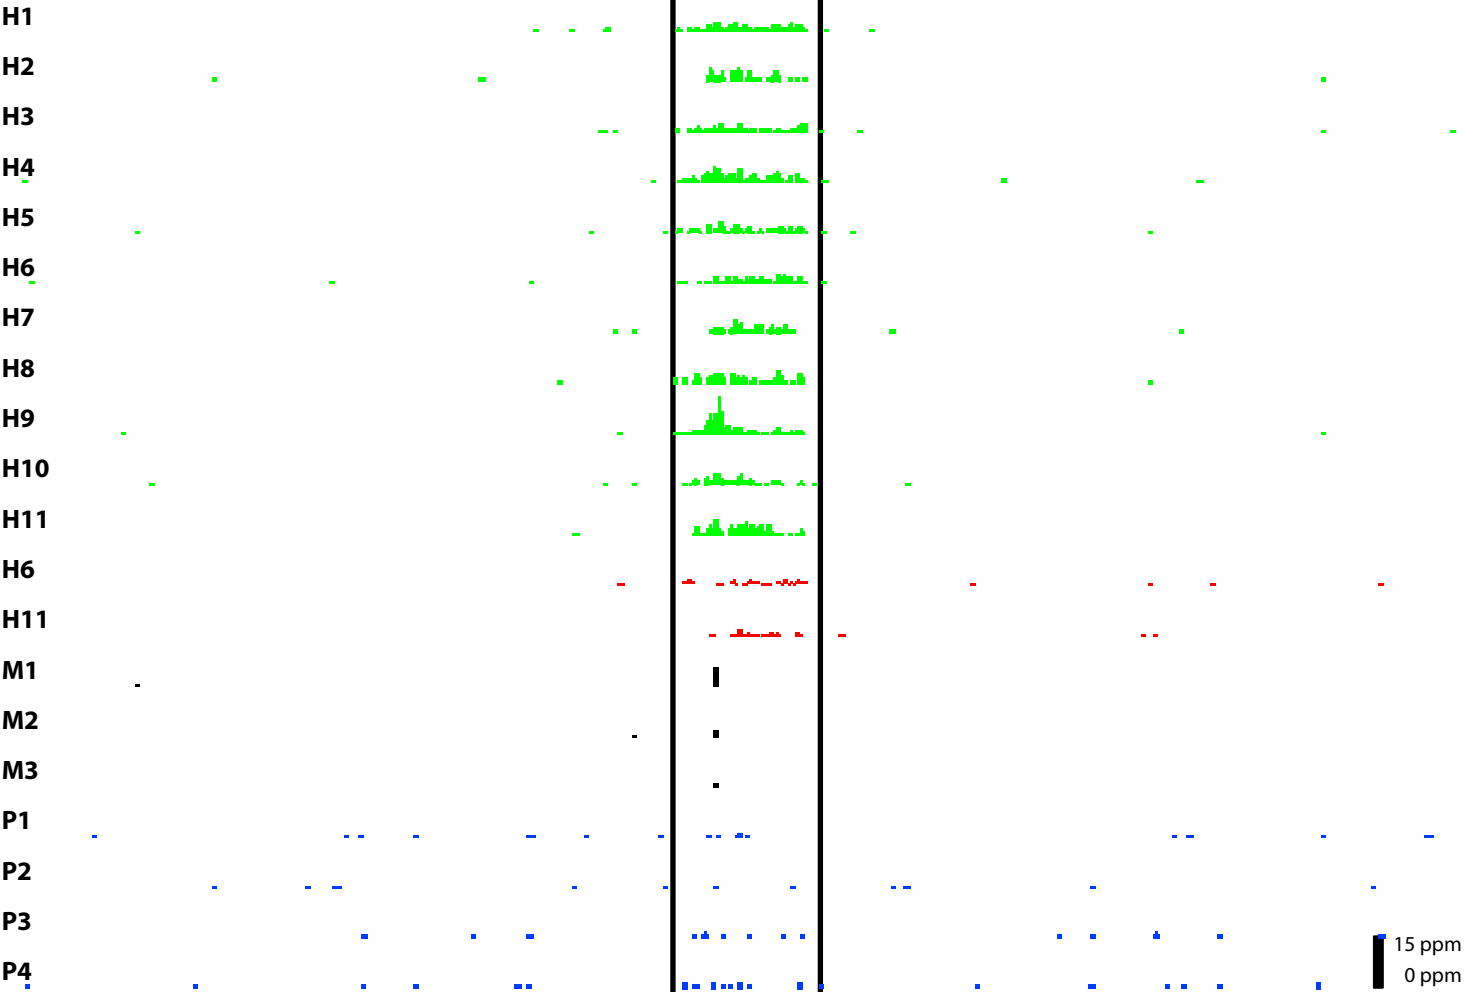

Mapped to RM2

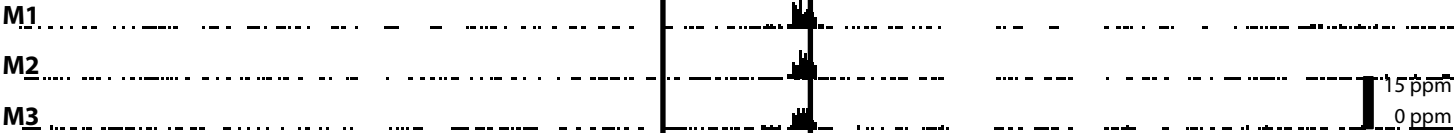

Mapped to PT2

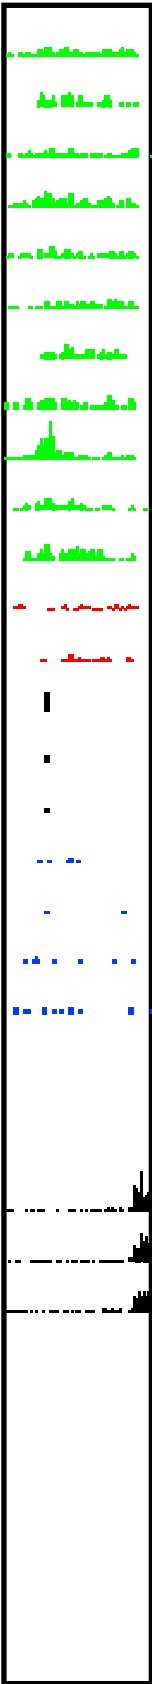

MIR663B ANKRD30BL

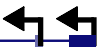

Known EST

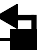

Mapped to HG19

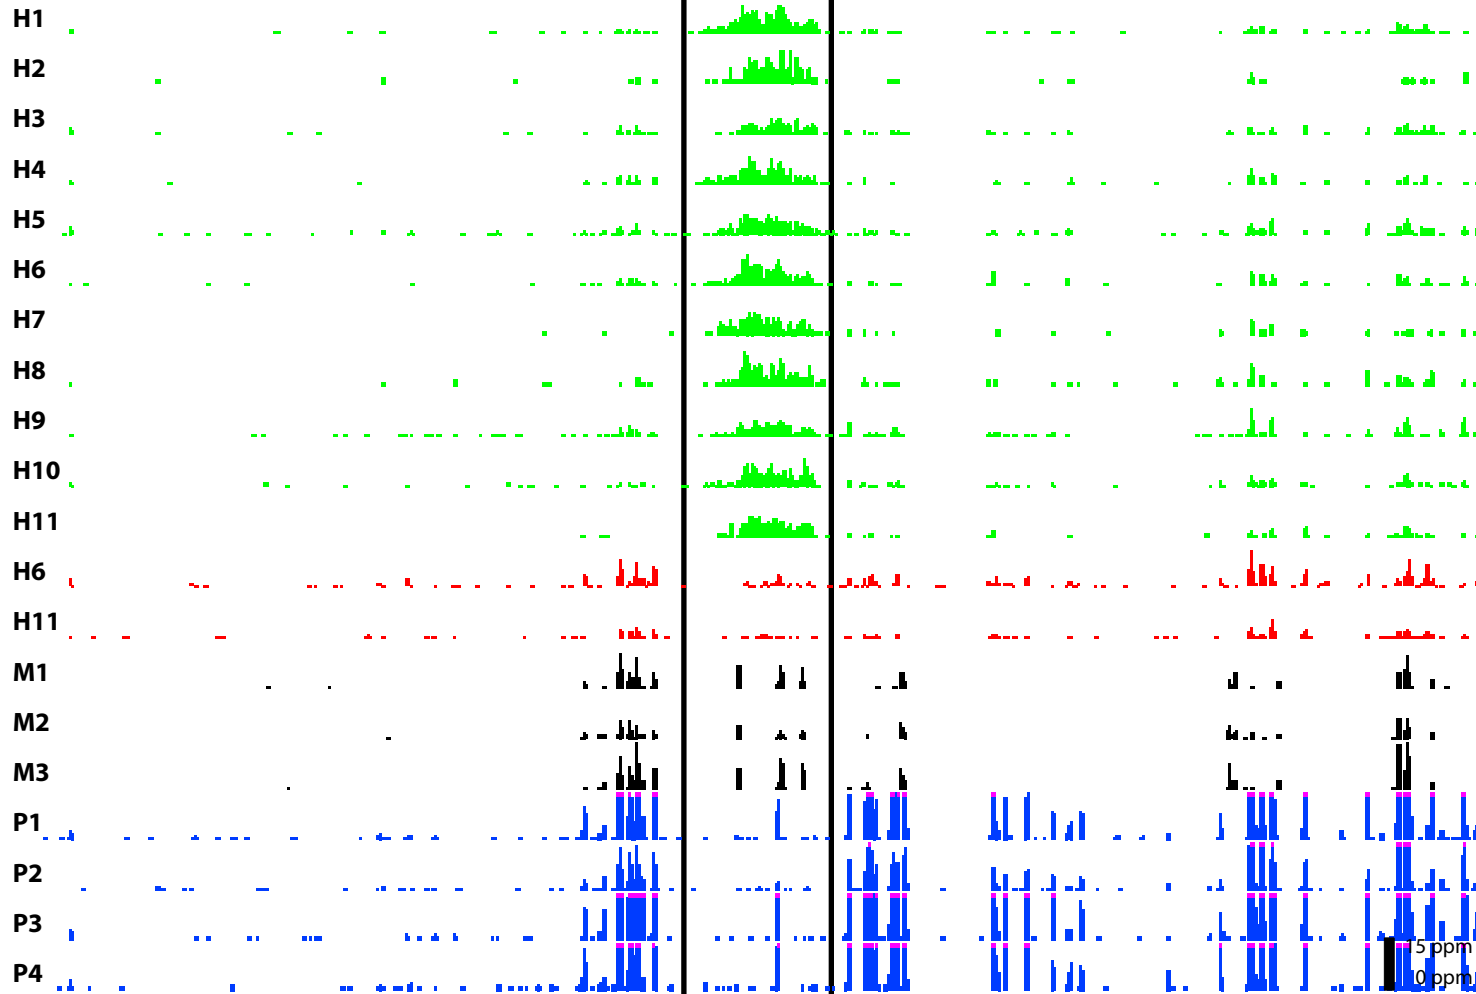

Mapped to RM2

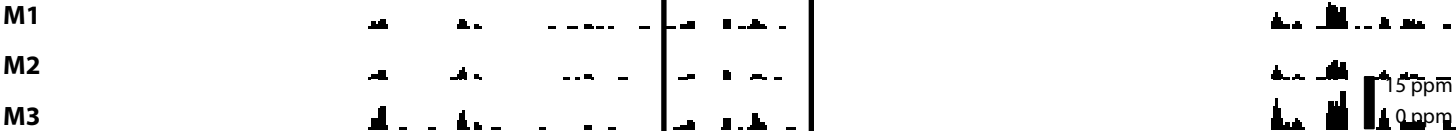

Mapped to PT2

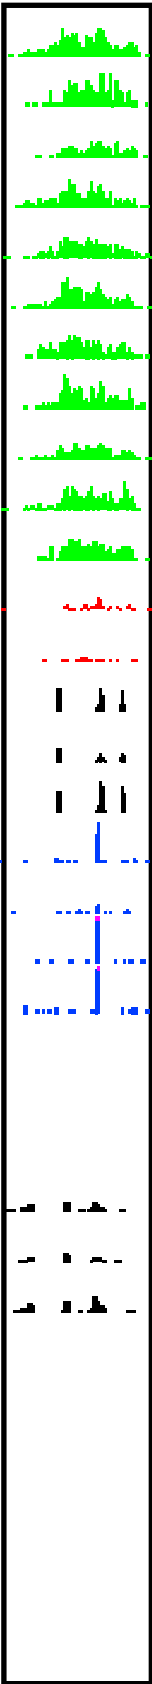

Chr3 230000

250000

*CHL1*

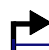

*Known EST*

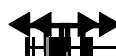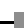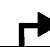

Mapped to HG19

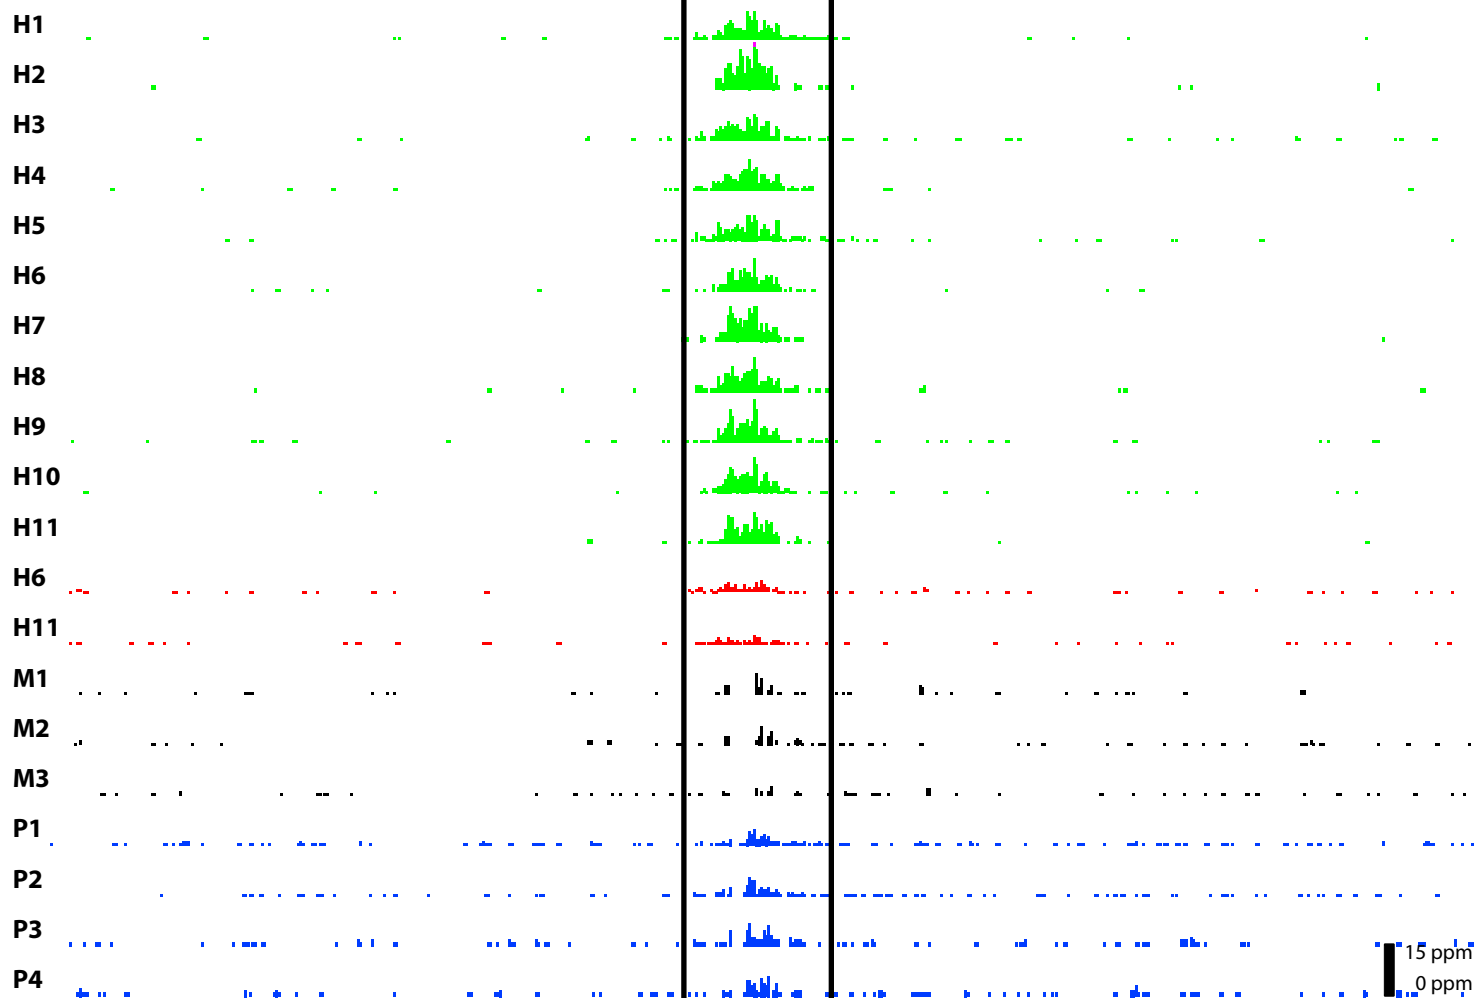

Mapped to RM2

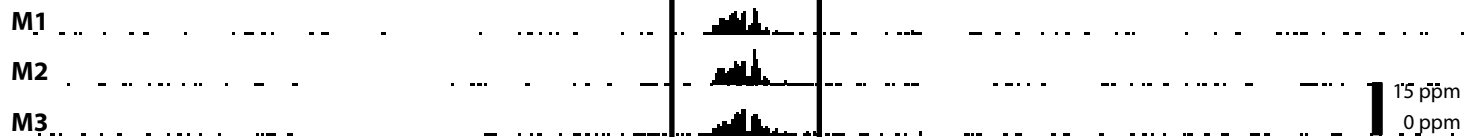

Mapped to PT2

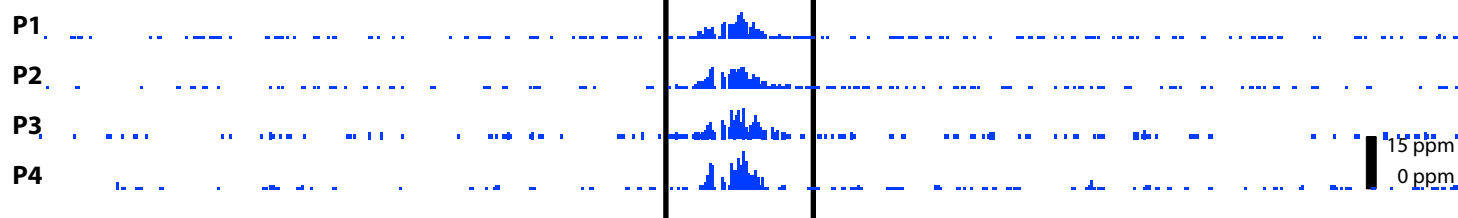

*CNTN4*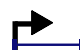*Known EST*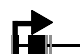

Mapped to HG19

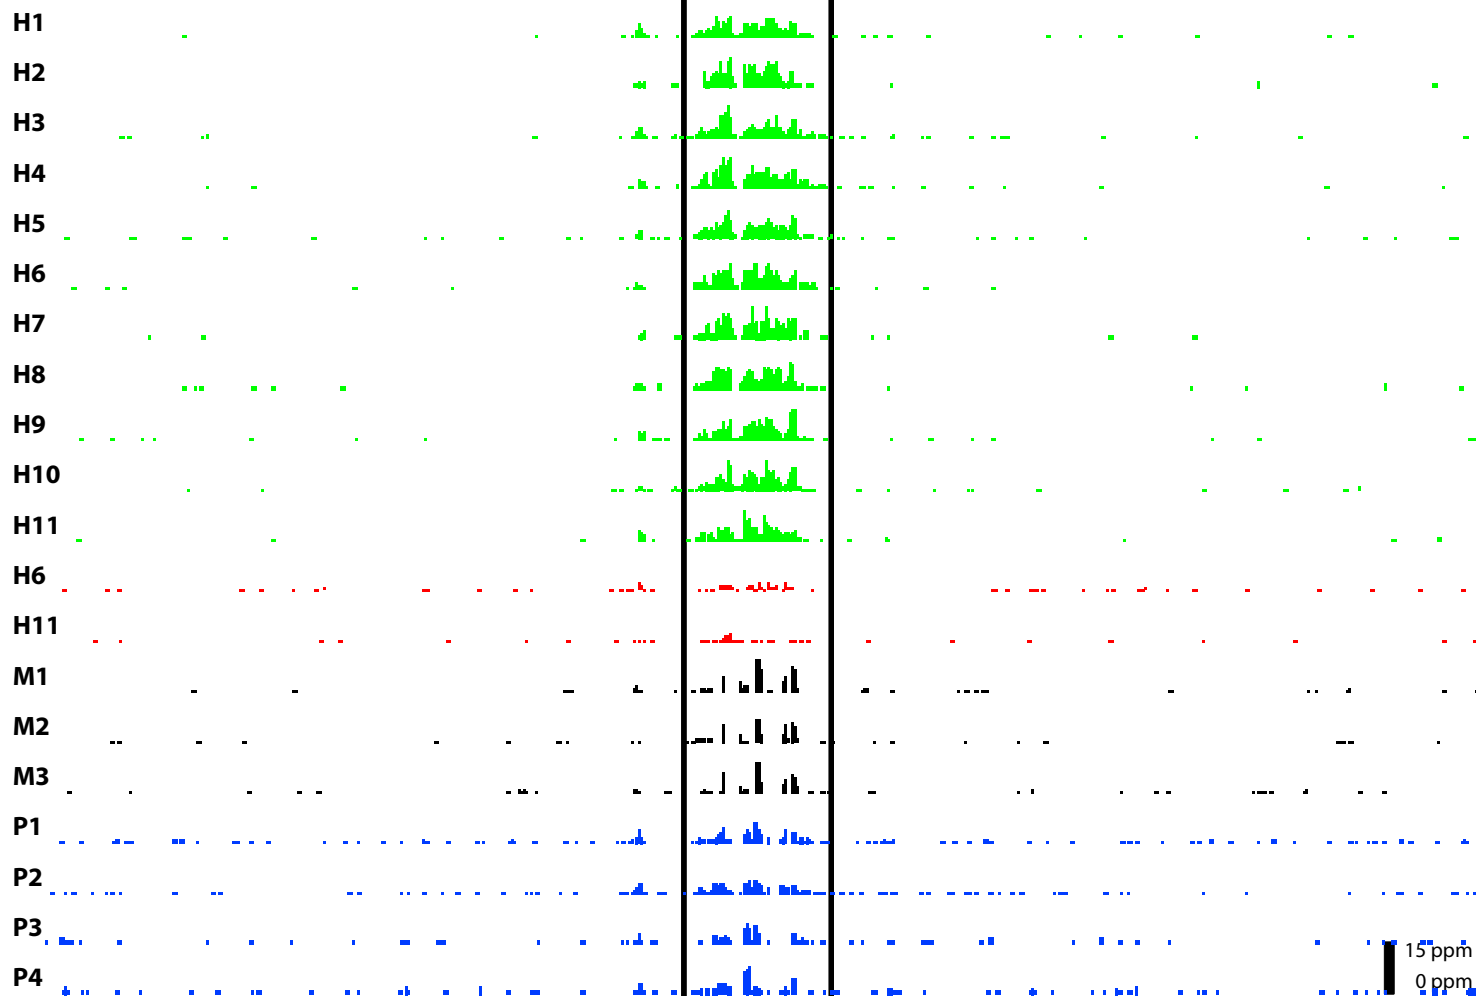

Mapped to RM2

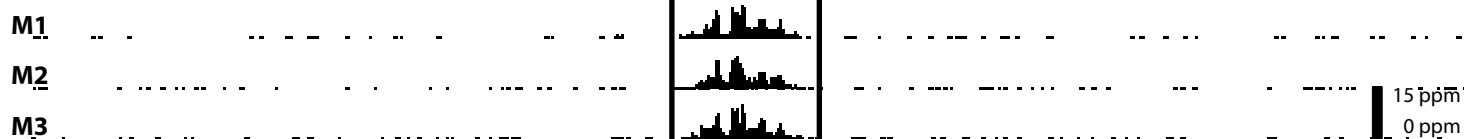

Mapped to PT2

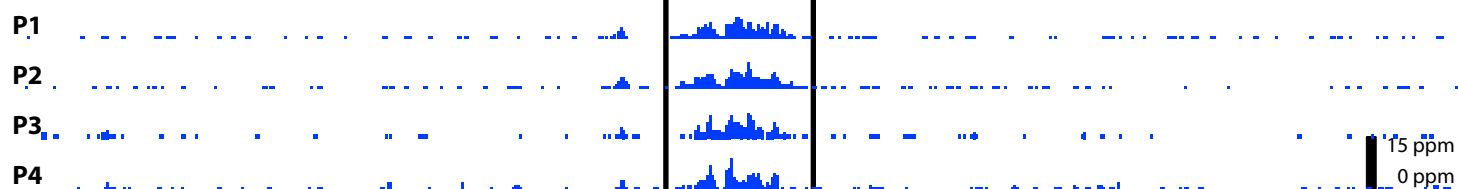

Known EST

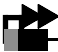

Mapped to HG19

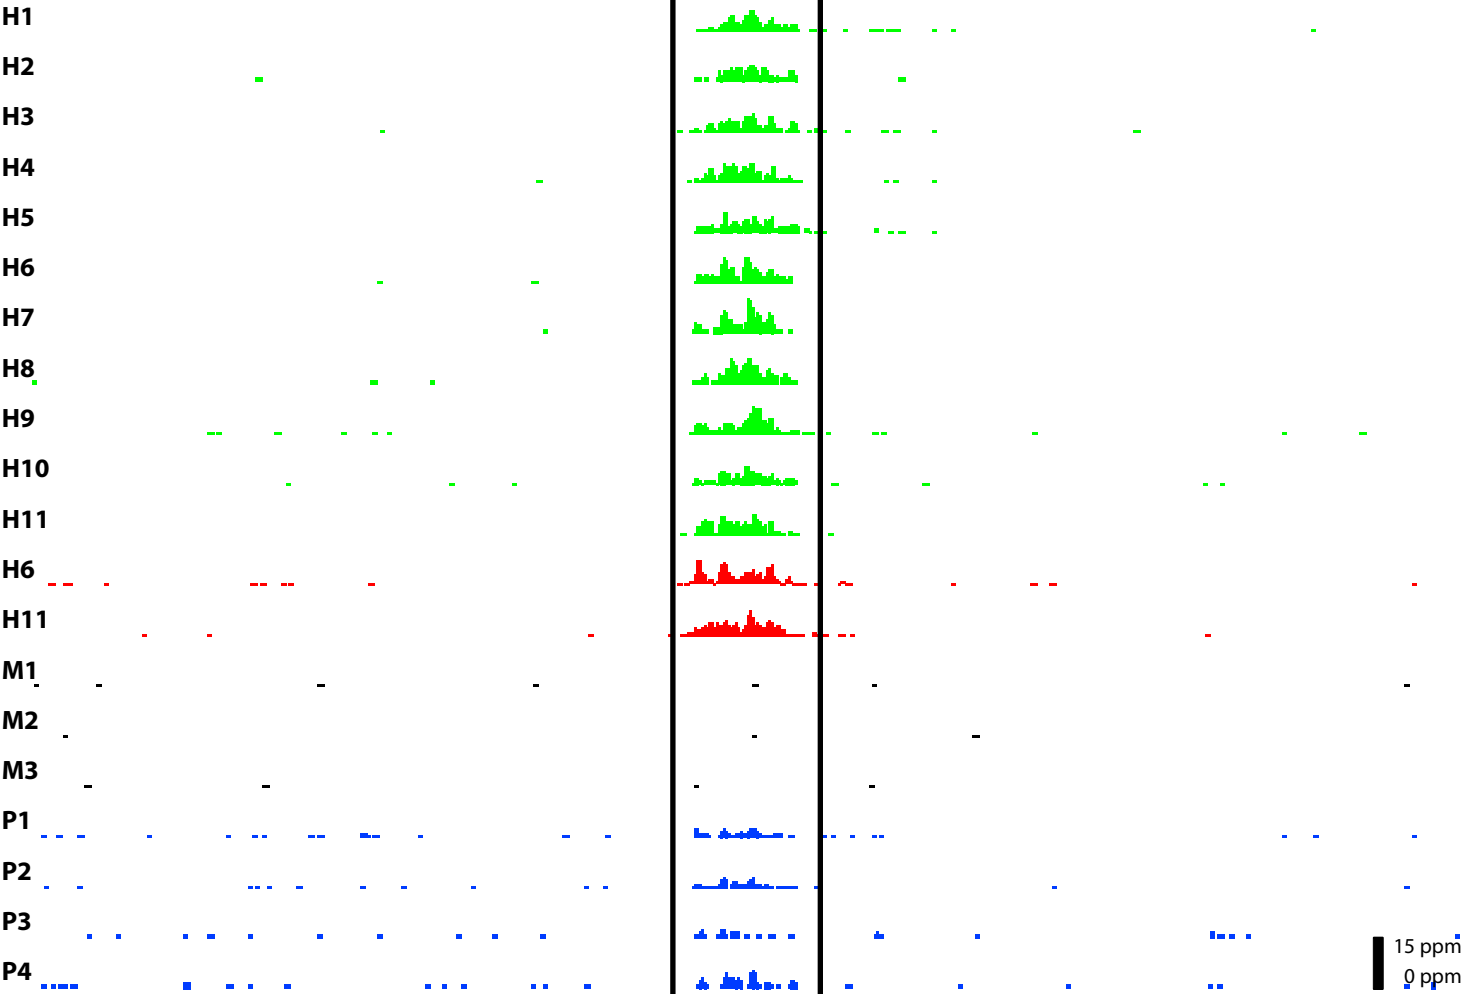

Mapped to RM2

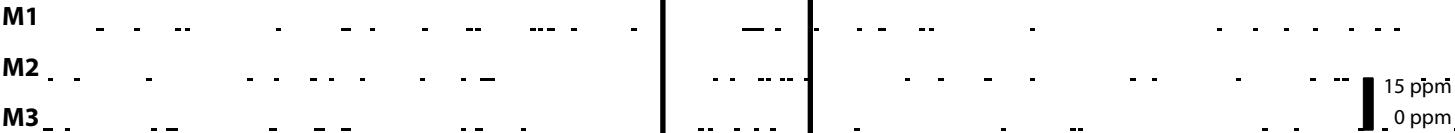

Mapped to PT2

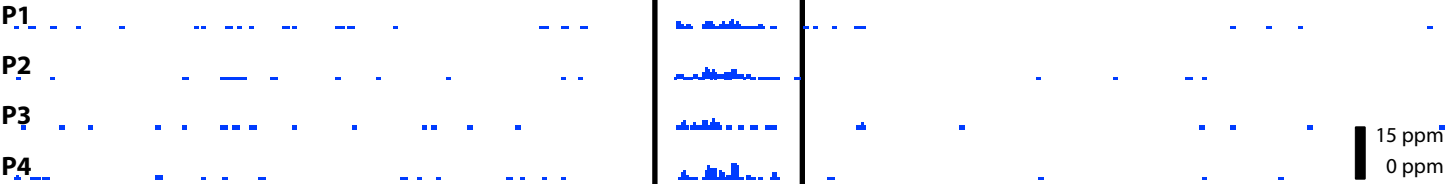

STK32A

Known EST

Mapped to HG19

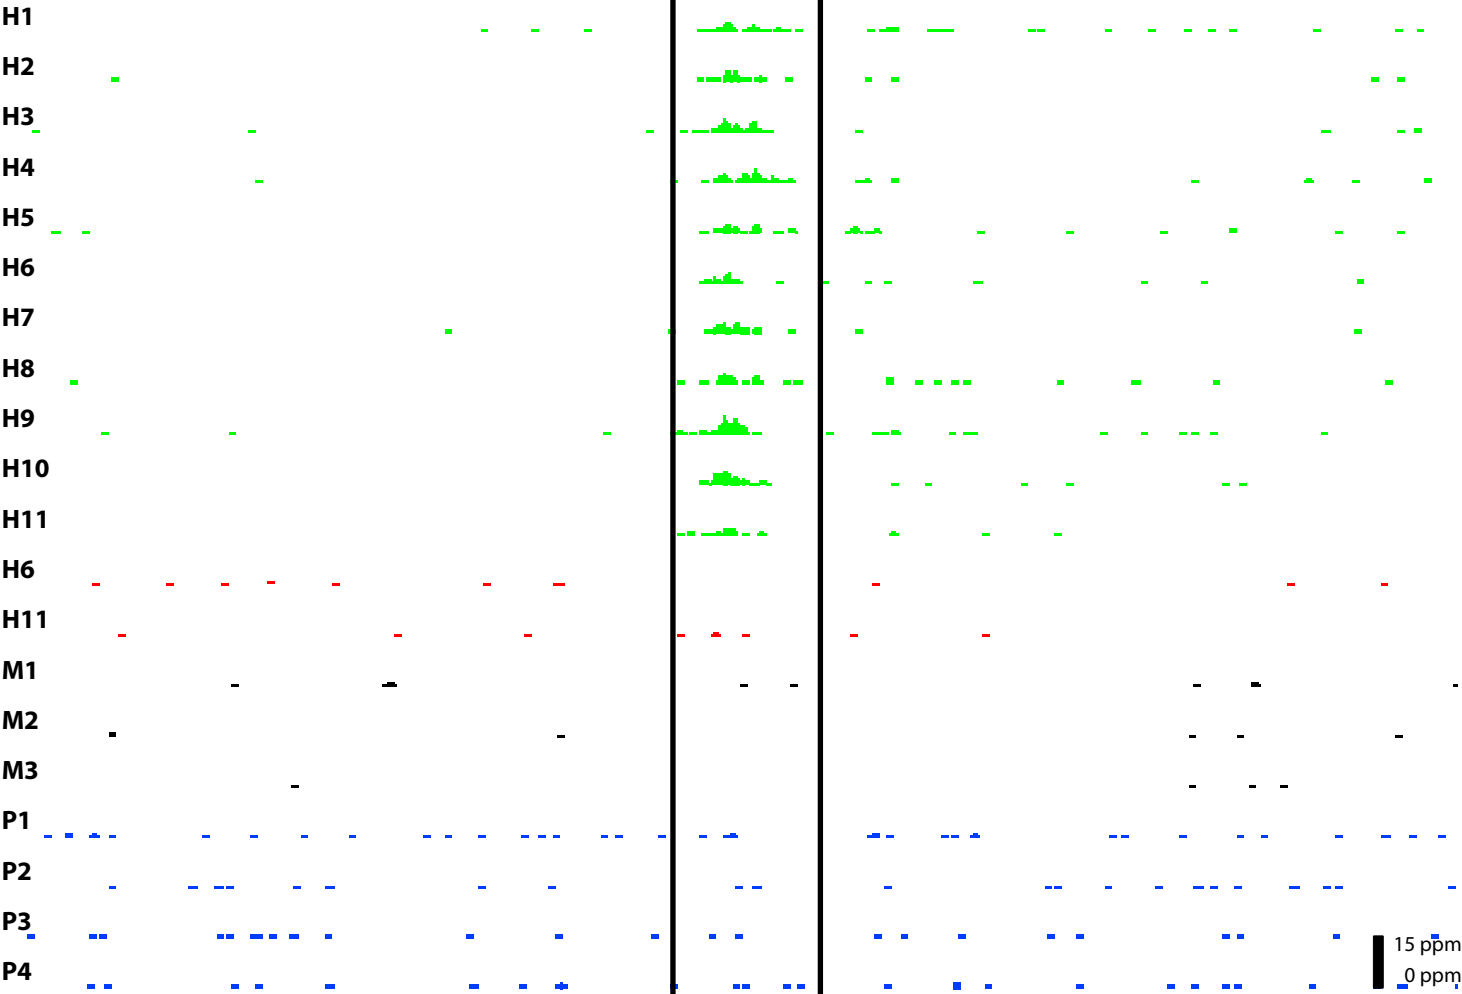

Mapped to RM2

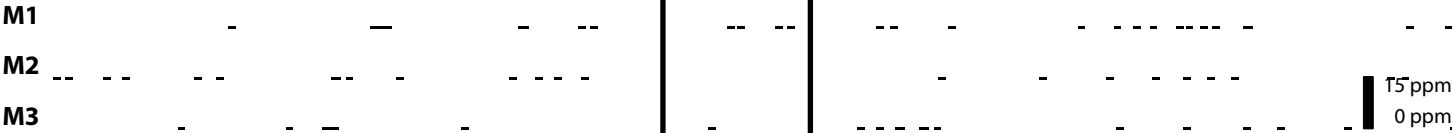

Mapped to PT2

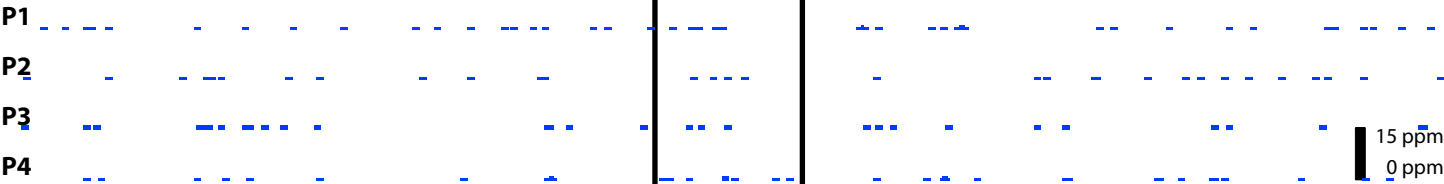

*C6orf97*

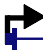

*Known EST*

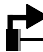

Mapped to HG19

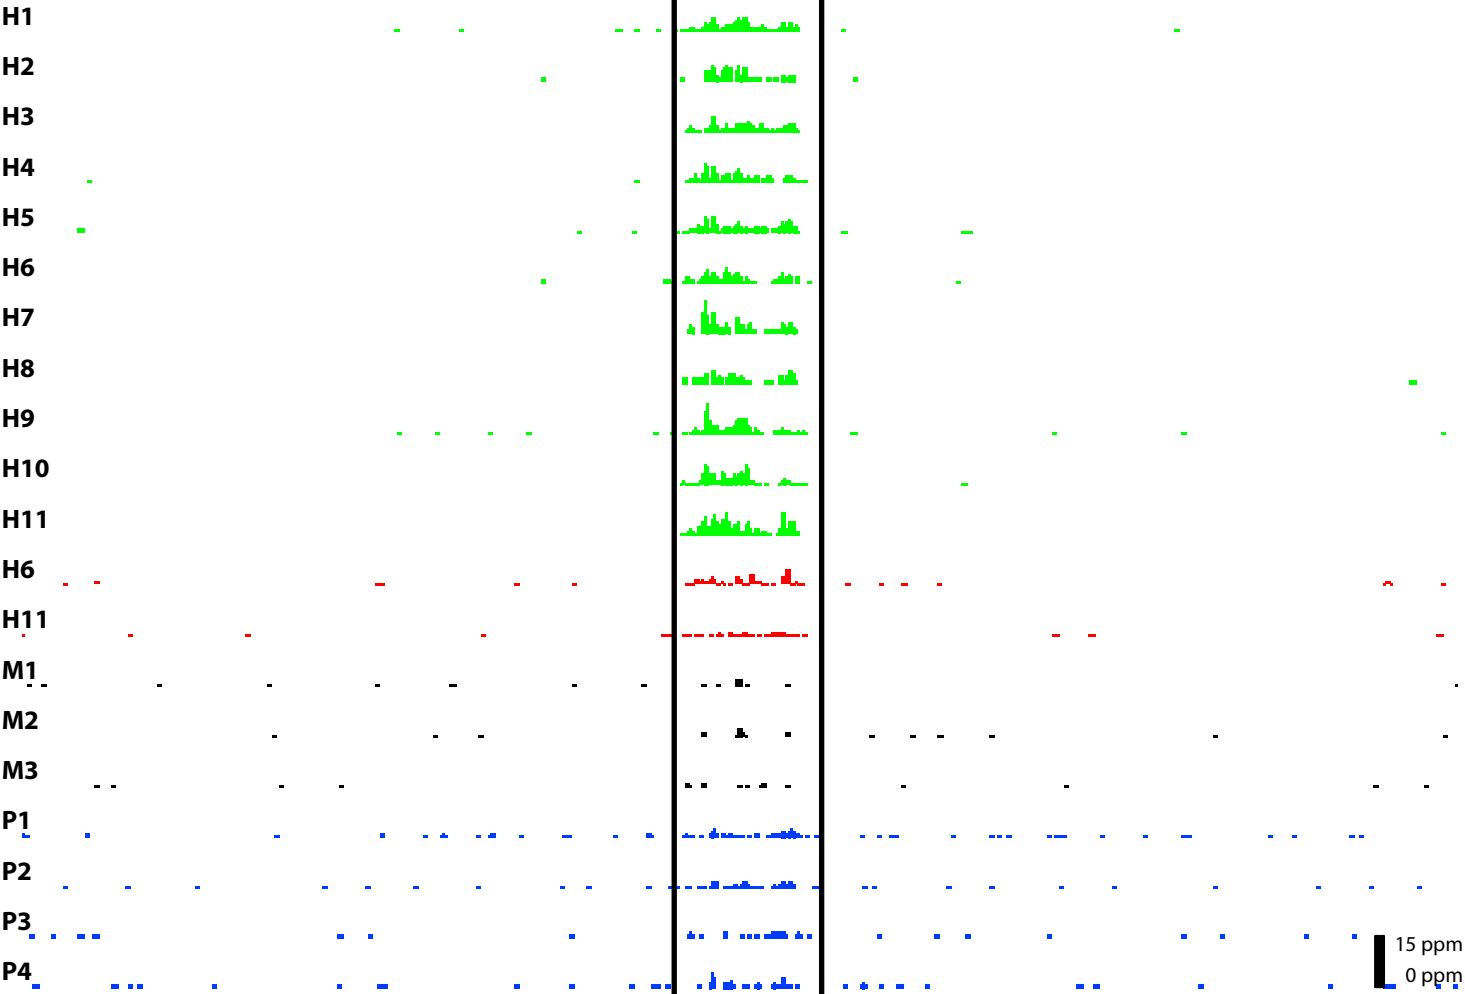

Mapped to RM2

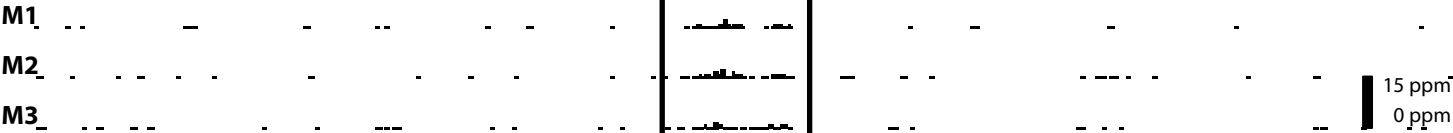

Mapped to PT2

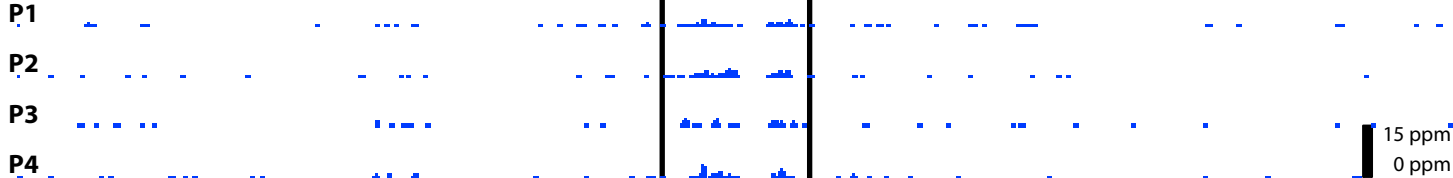

**LOC401321**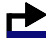**Known EST**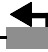

Mapped to HG19

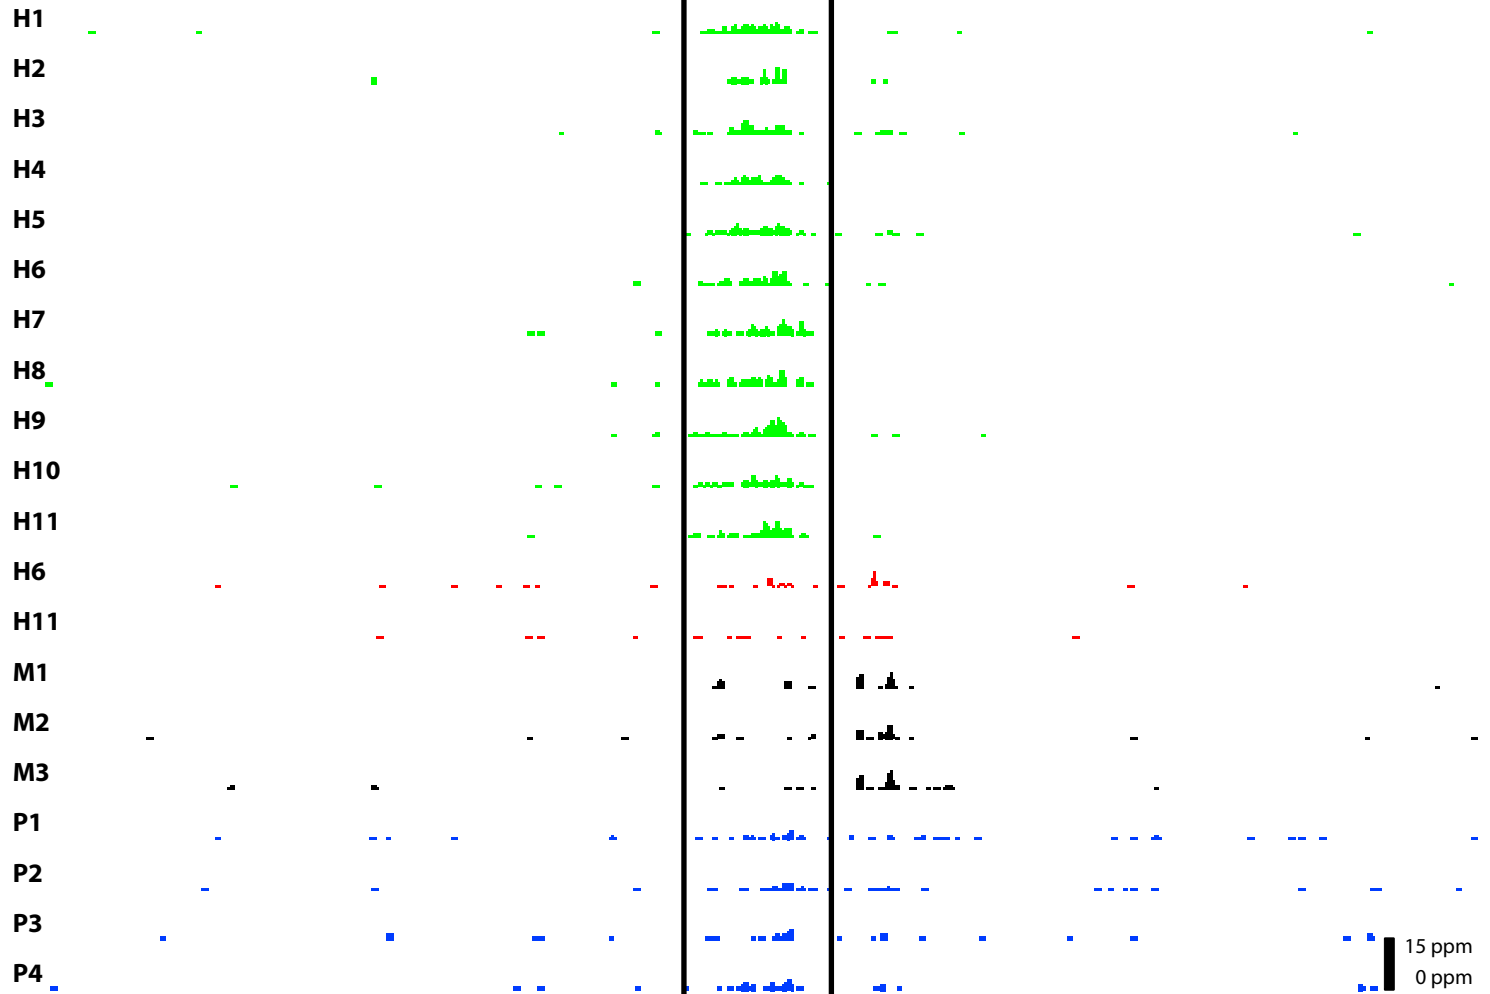

Mapped to RM2

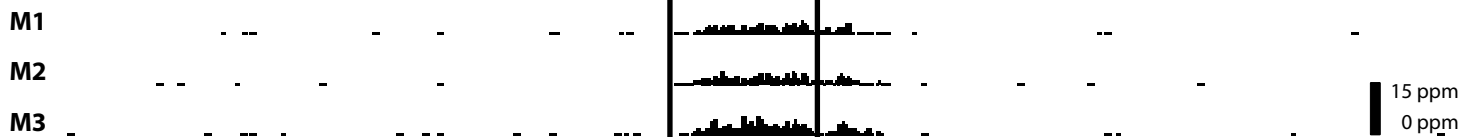

Mapped to PT2

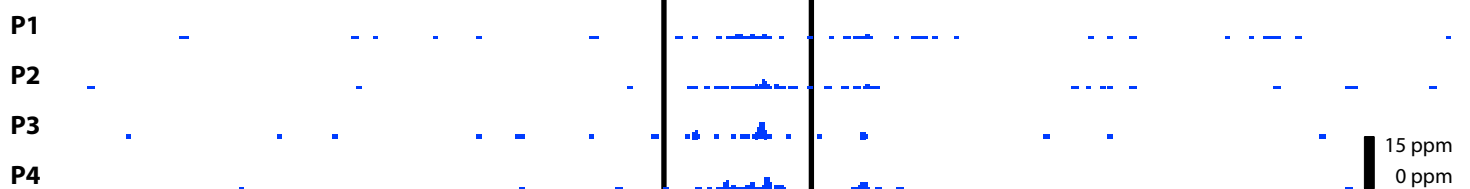

Known EST

Mapped to HG19

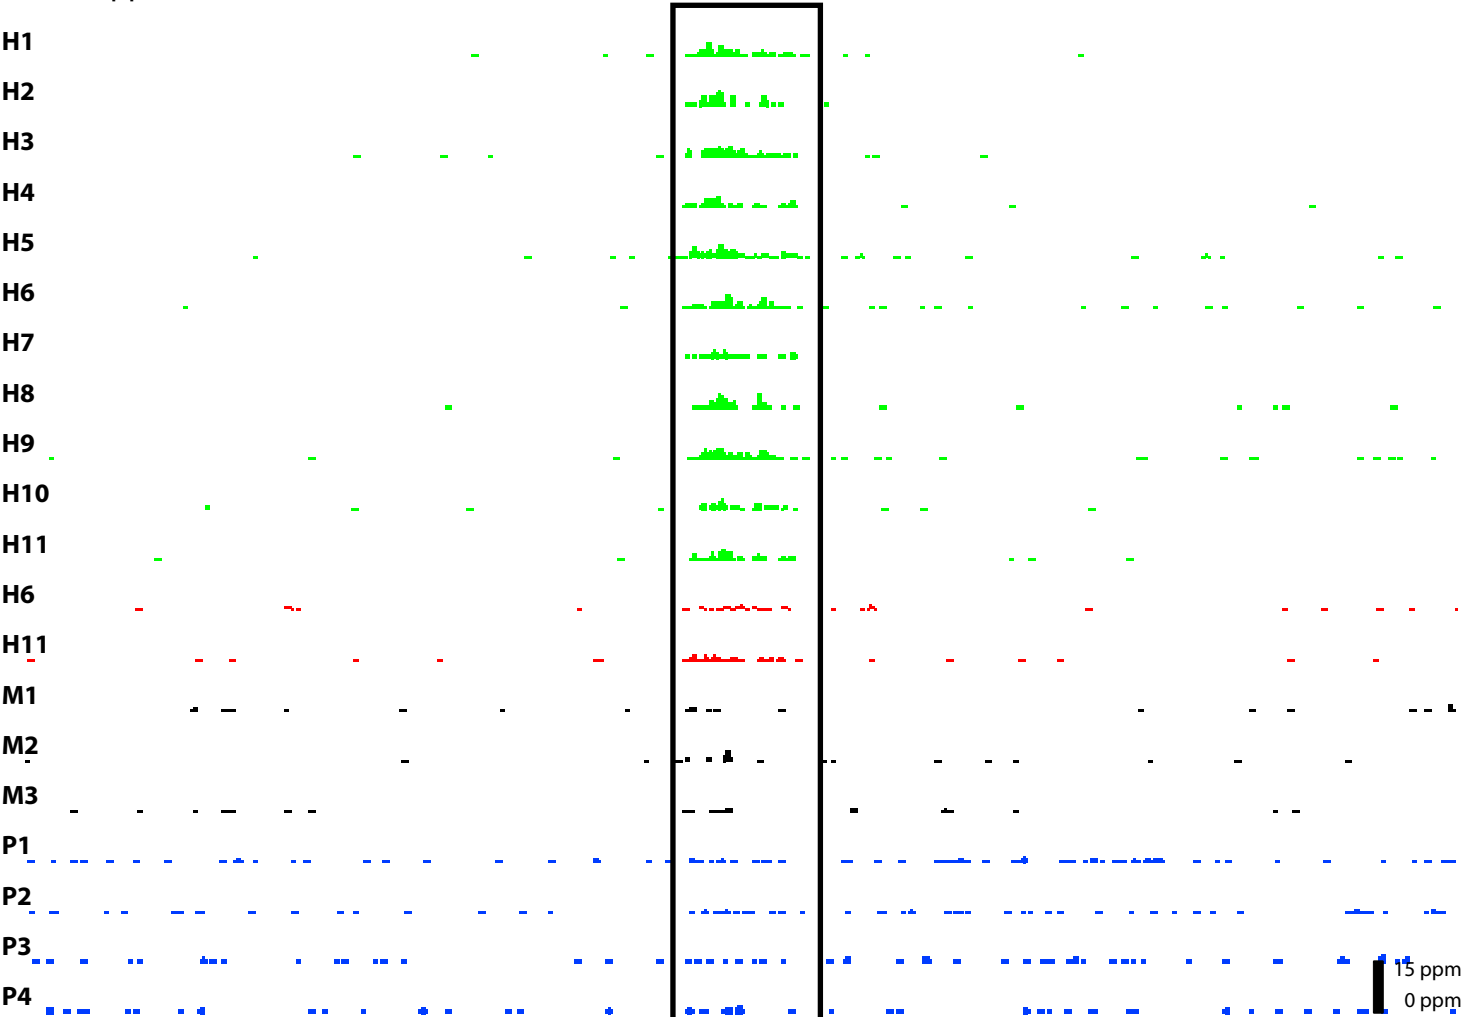

Mapped to RM2

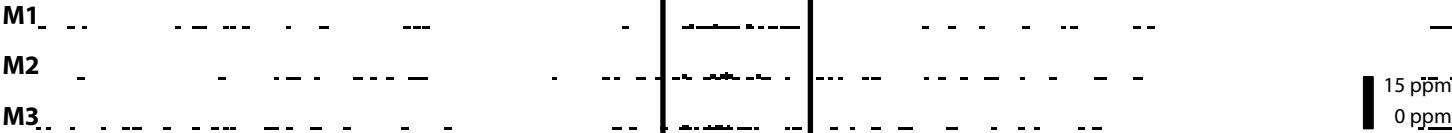

Mapped to PT2

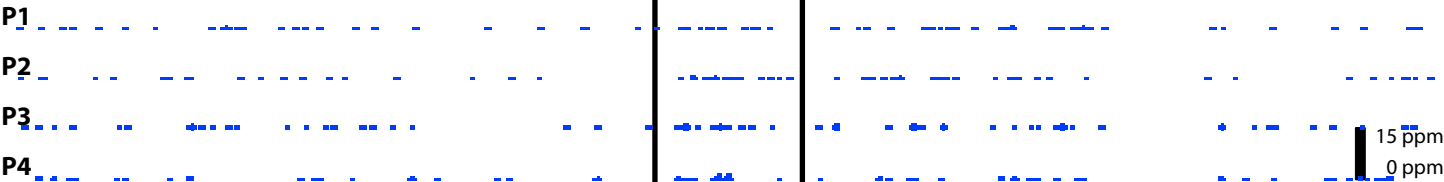

*Known EST*

Mapped to HG19

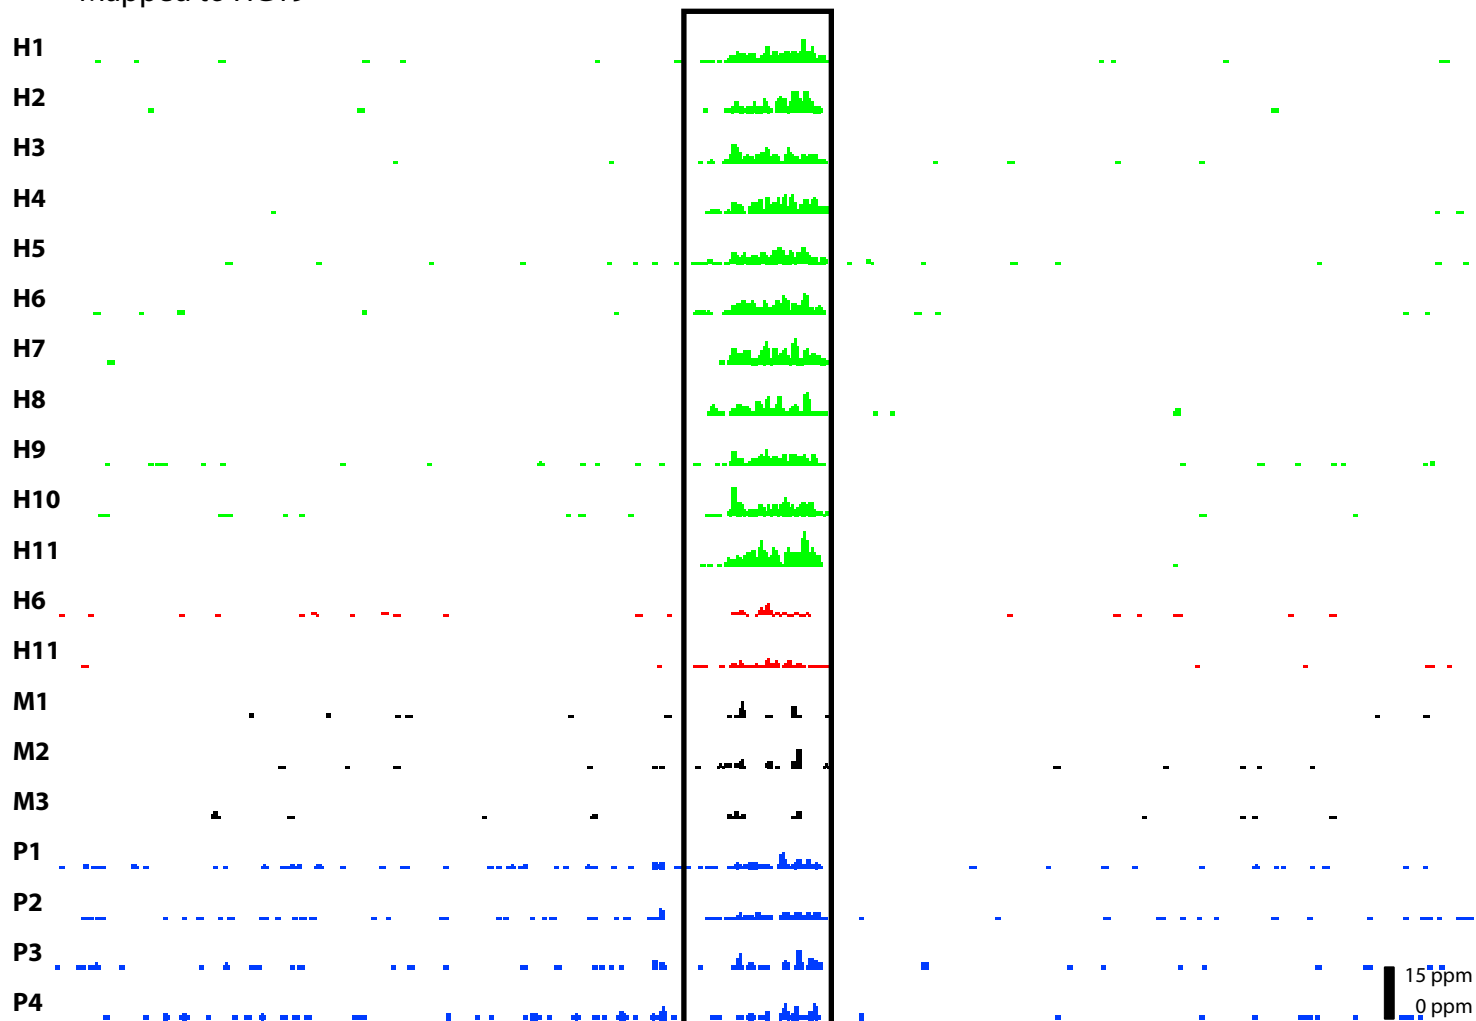

Mapped to RM2

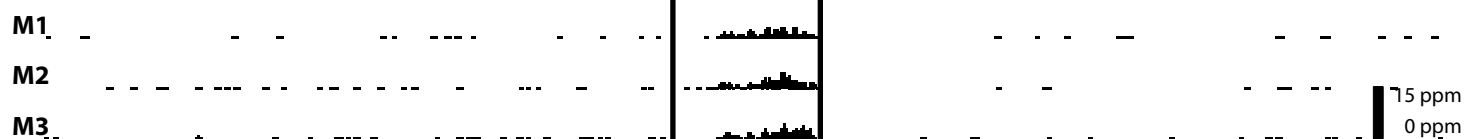

Mapped to PT2

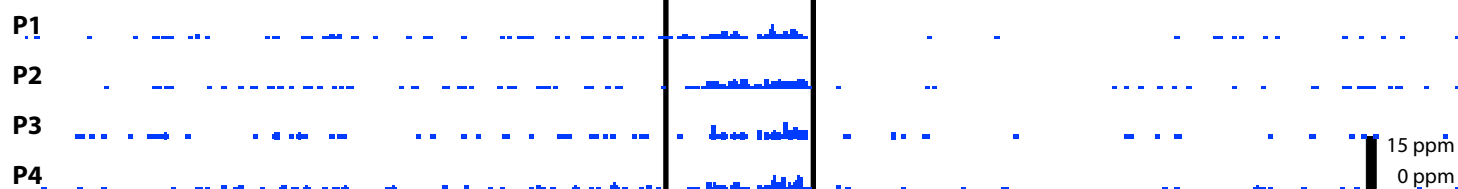

Known EST

Mapped to HG19

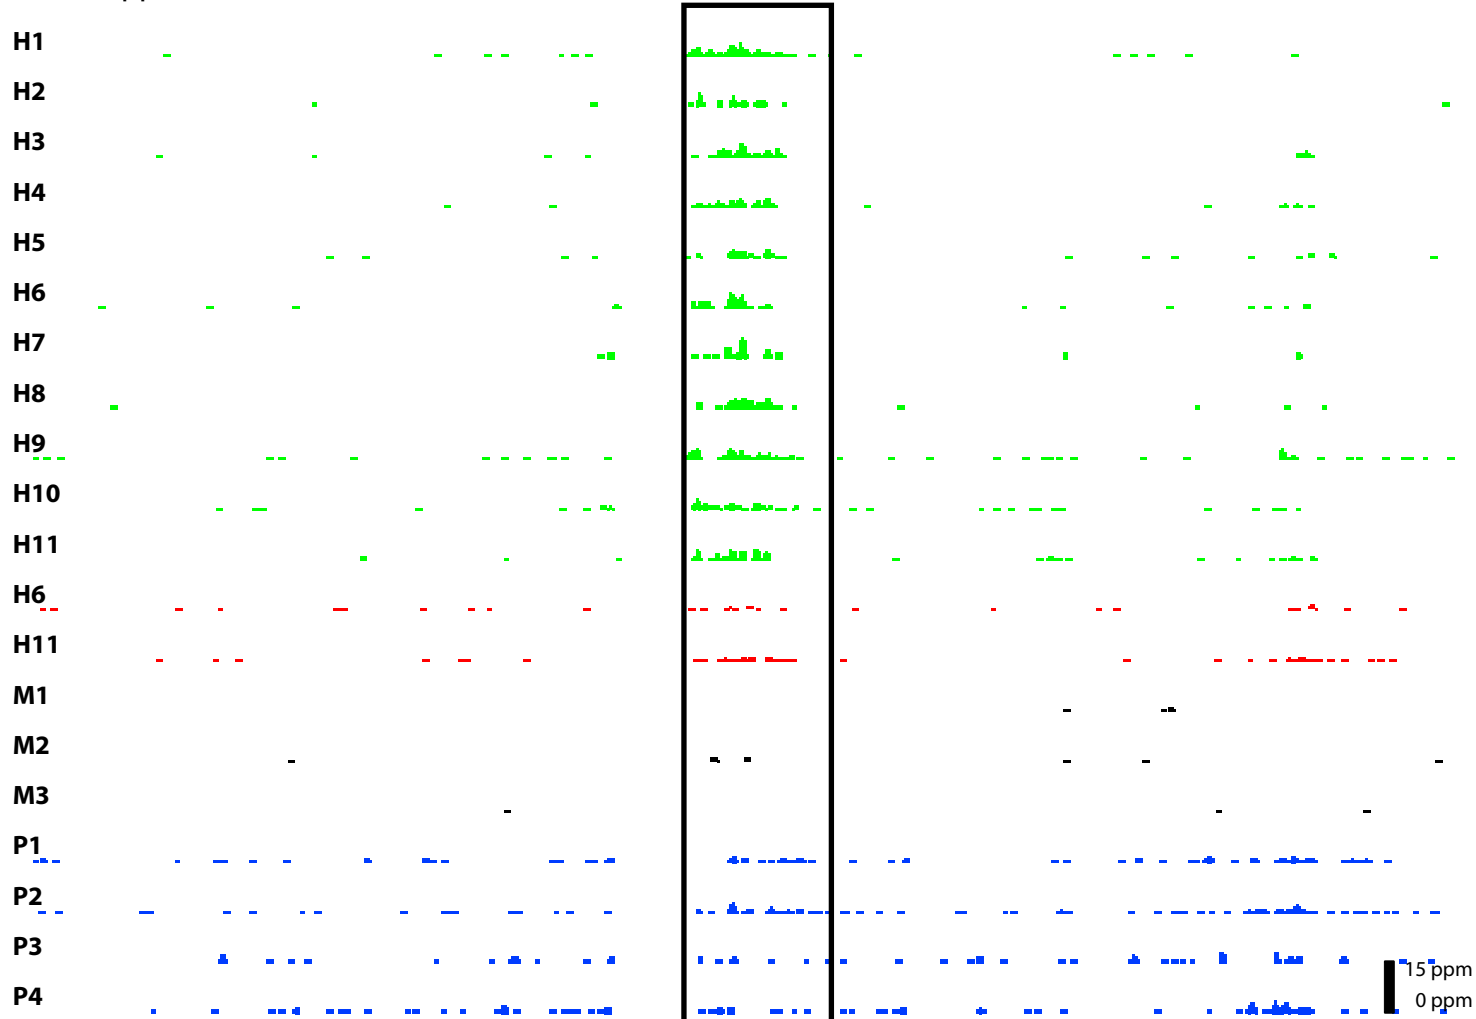

Mapped to RM2

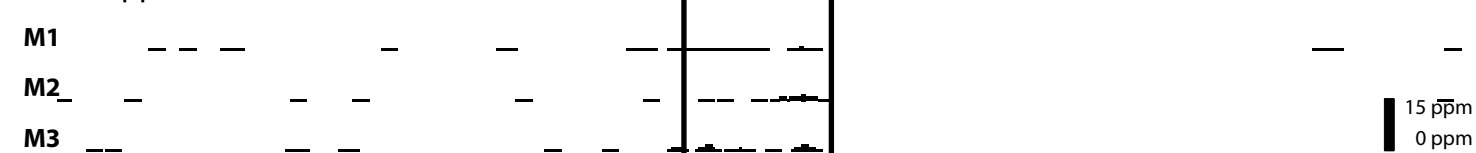

Mapped to PT2

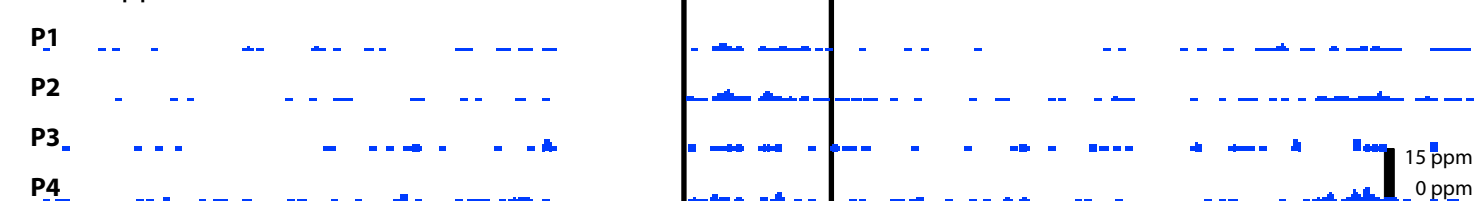

*Known EST*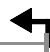

Mapped to HG19

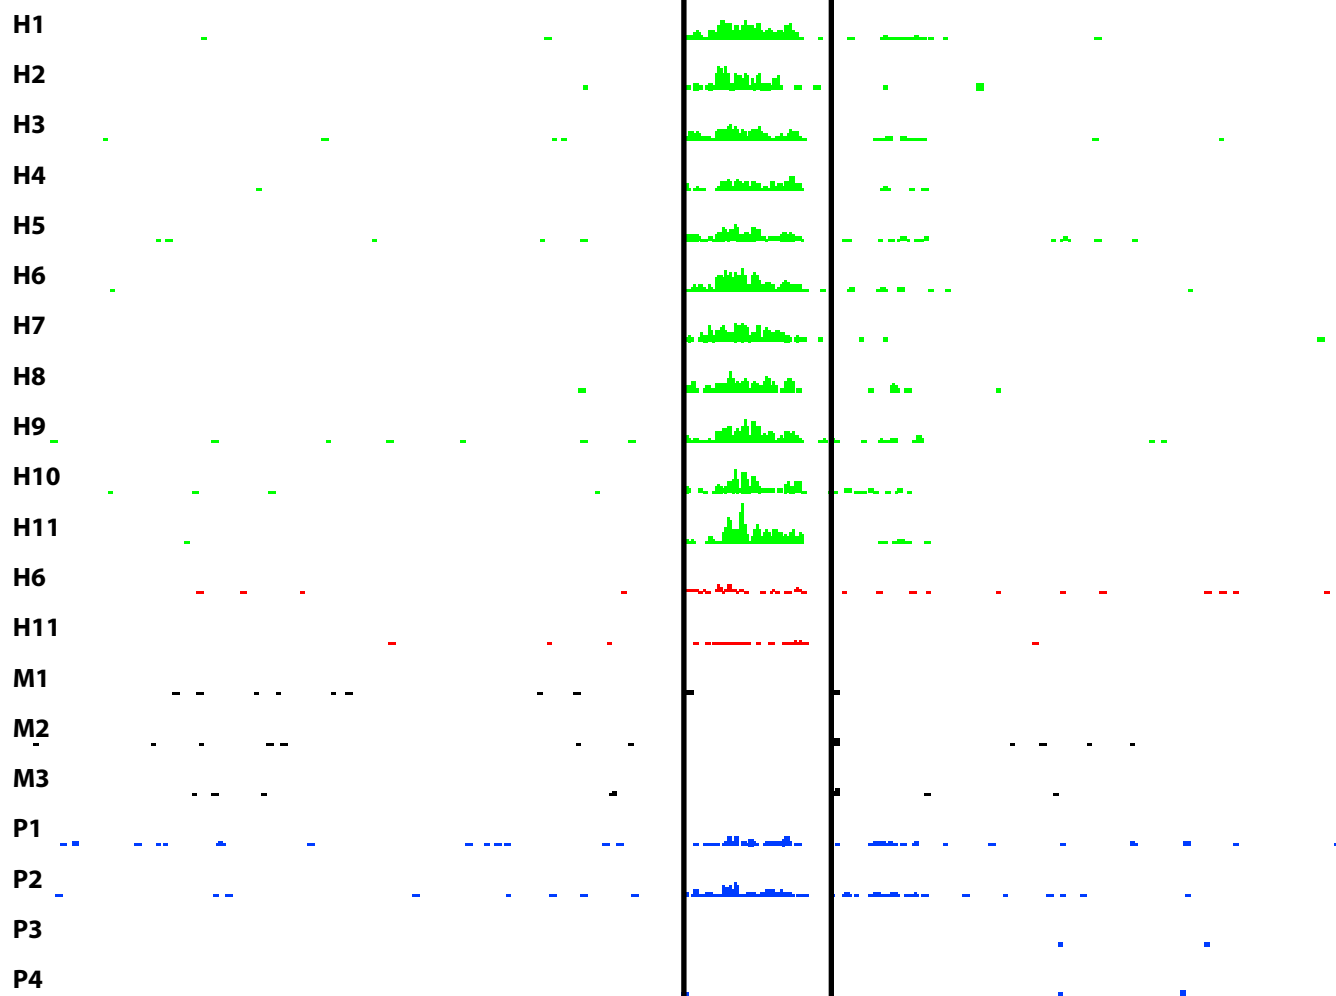

Mapped to RM2

Mapped to PT2

POLL

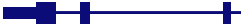

Known EST

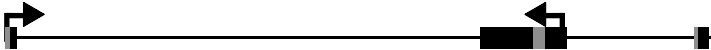

Mapped to HG19

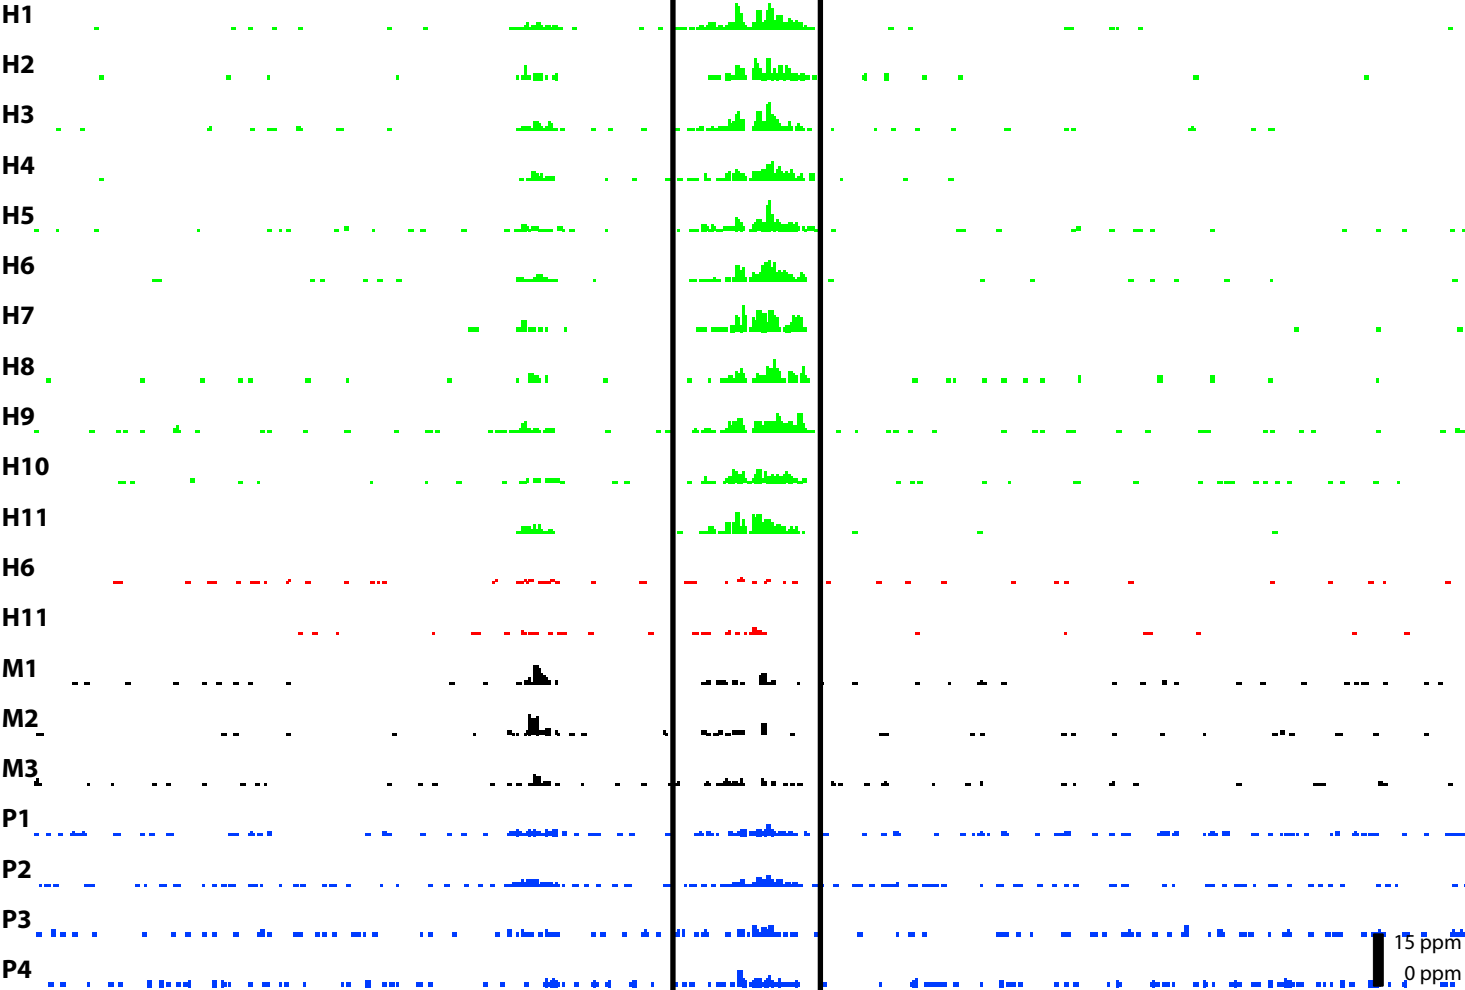

Mapped to RM2

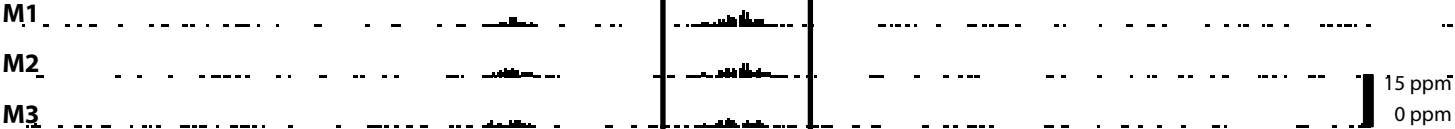

Mapped to PT2

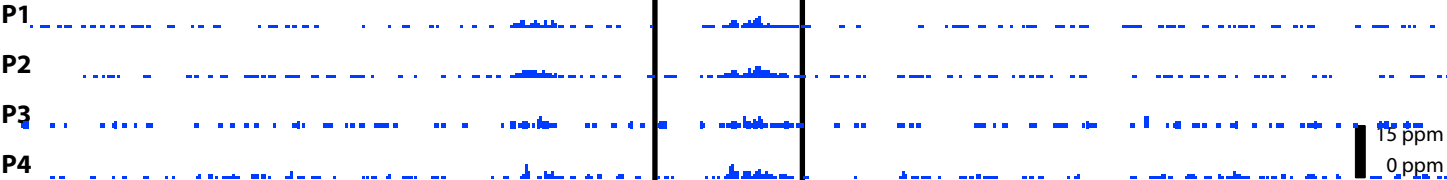

*Known EST*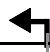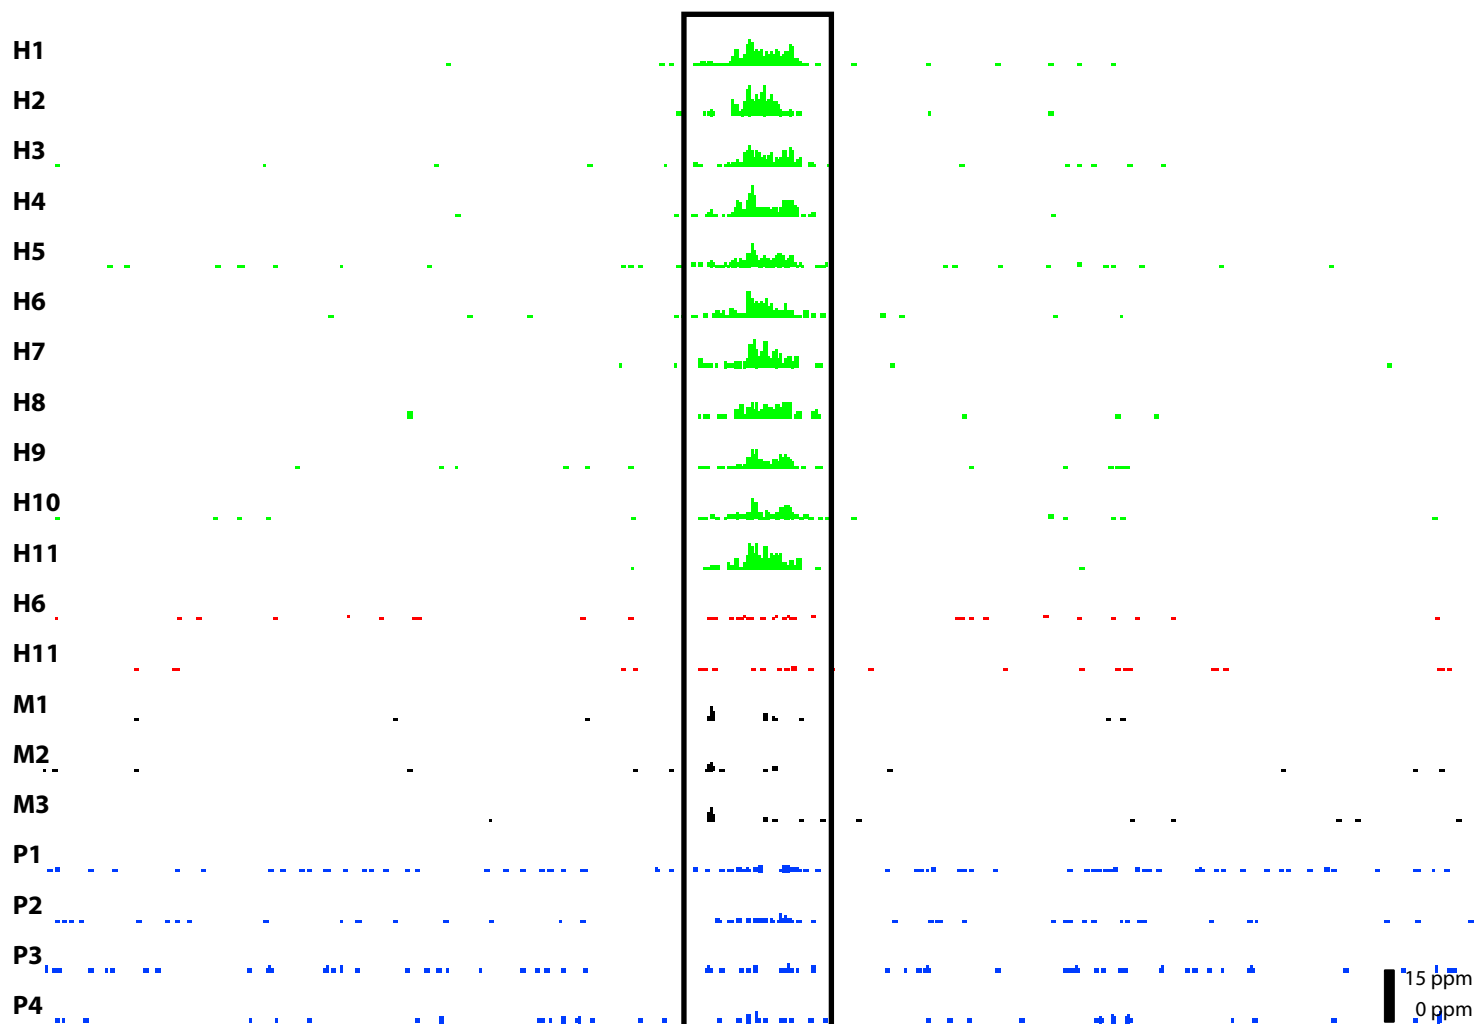

Mapped to RM2

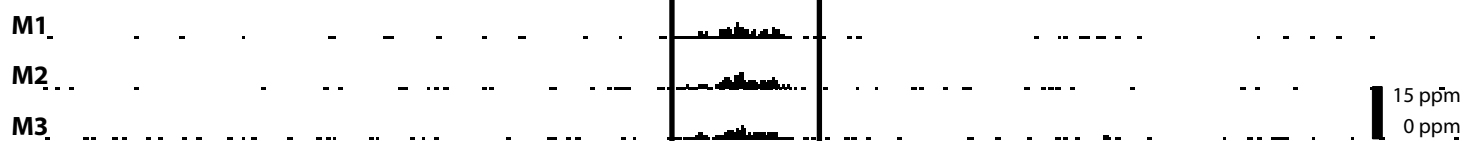

Mapped to PT2

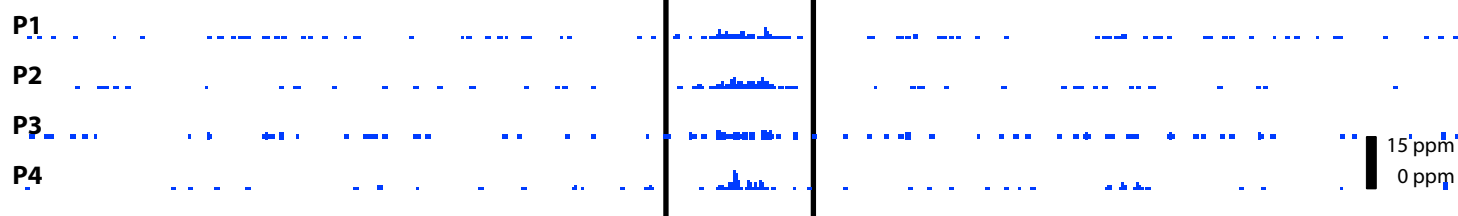

Chr11 850000

870000

*TSPAN4**CHD1*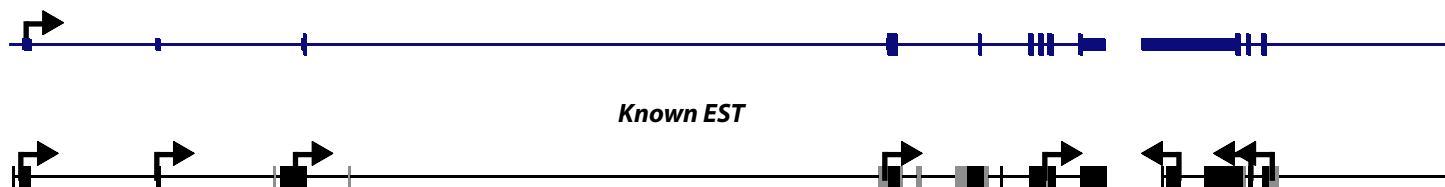

Mapped to HG19

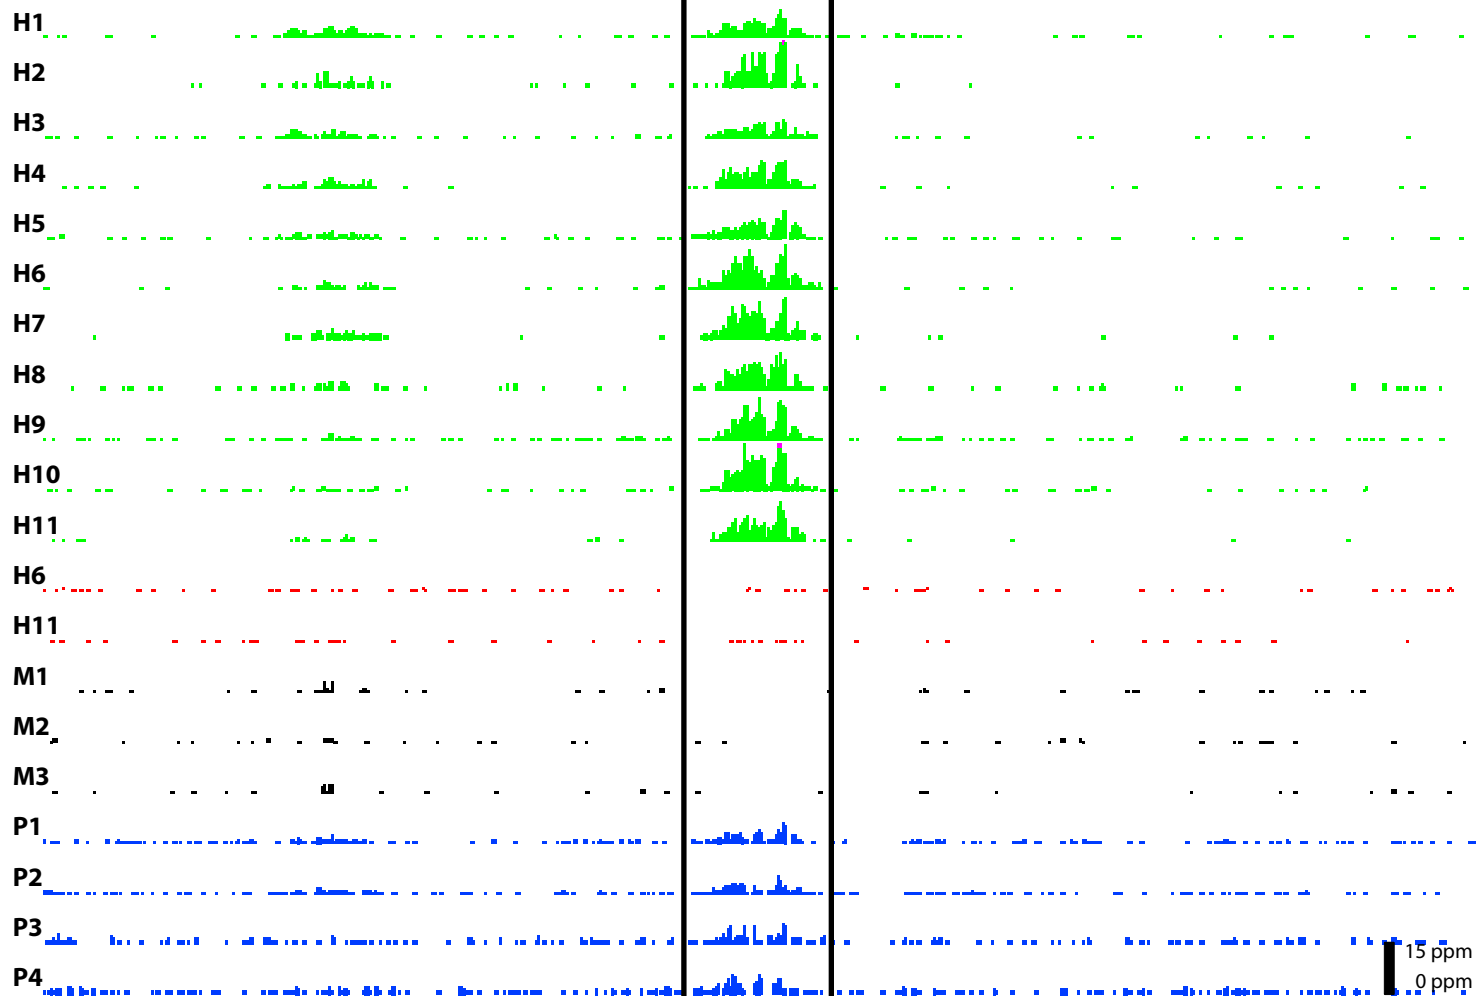

Mapped to RM2

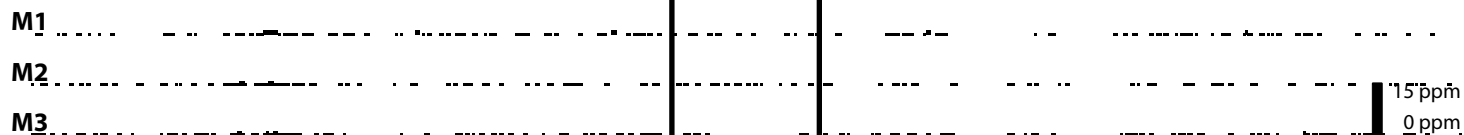

Mapped to PT2

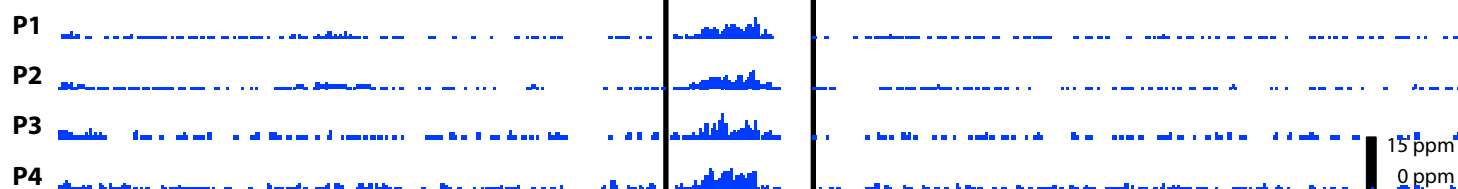

Known EST

Mapped to HG19

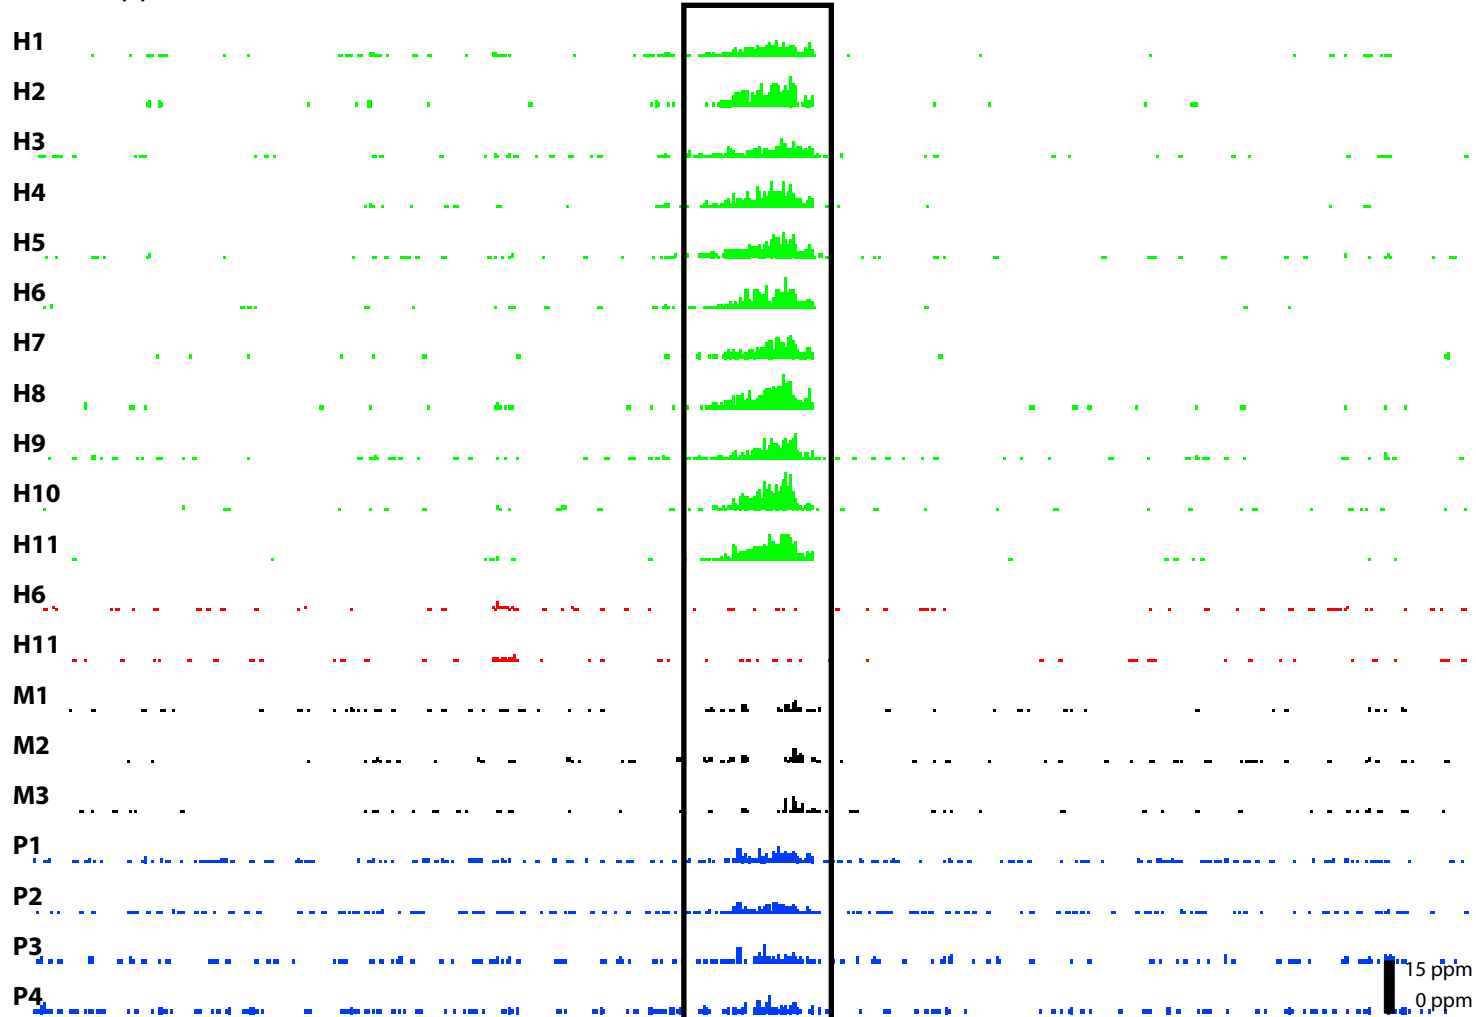

Mapped to RM2

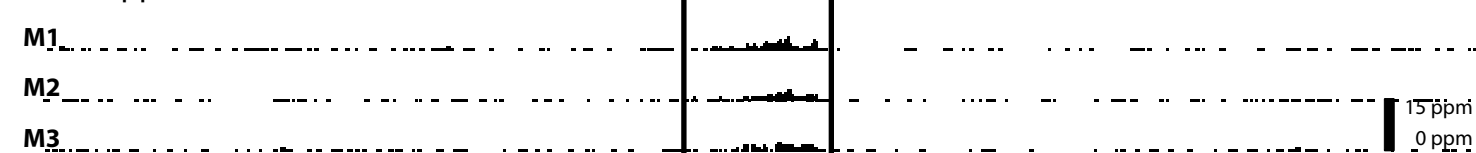

Mapped to PT2

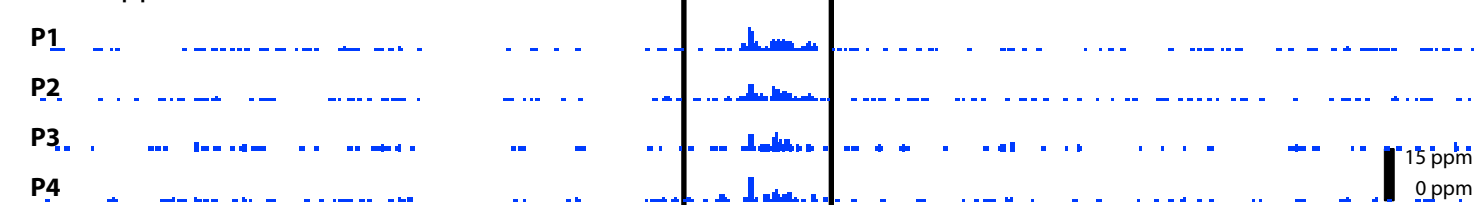

*Known EST*

Mapped to HG19

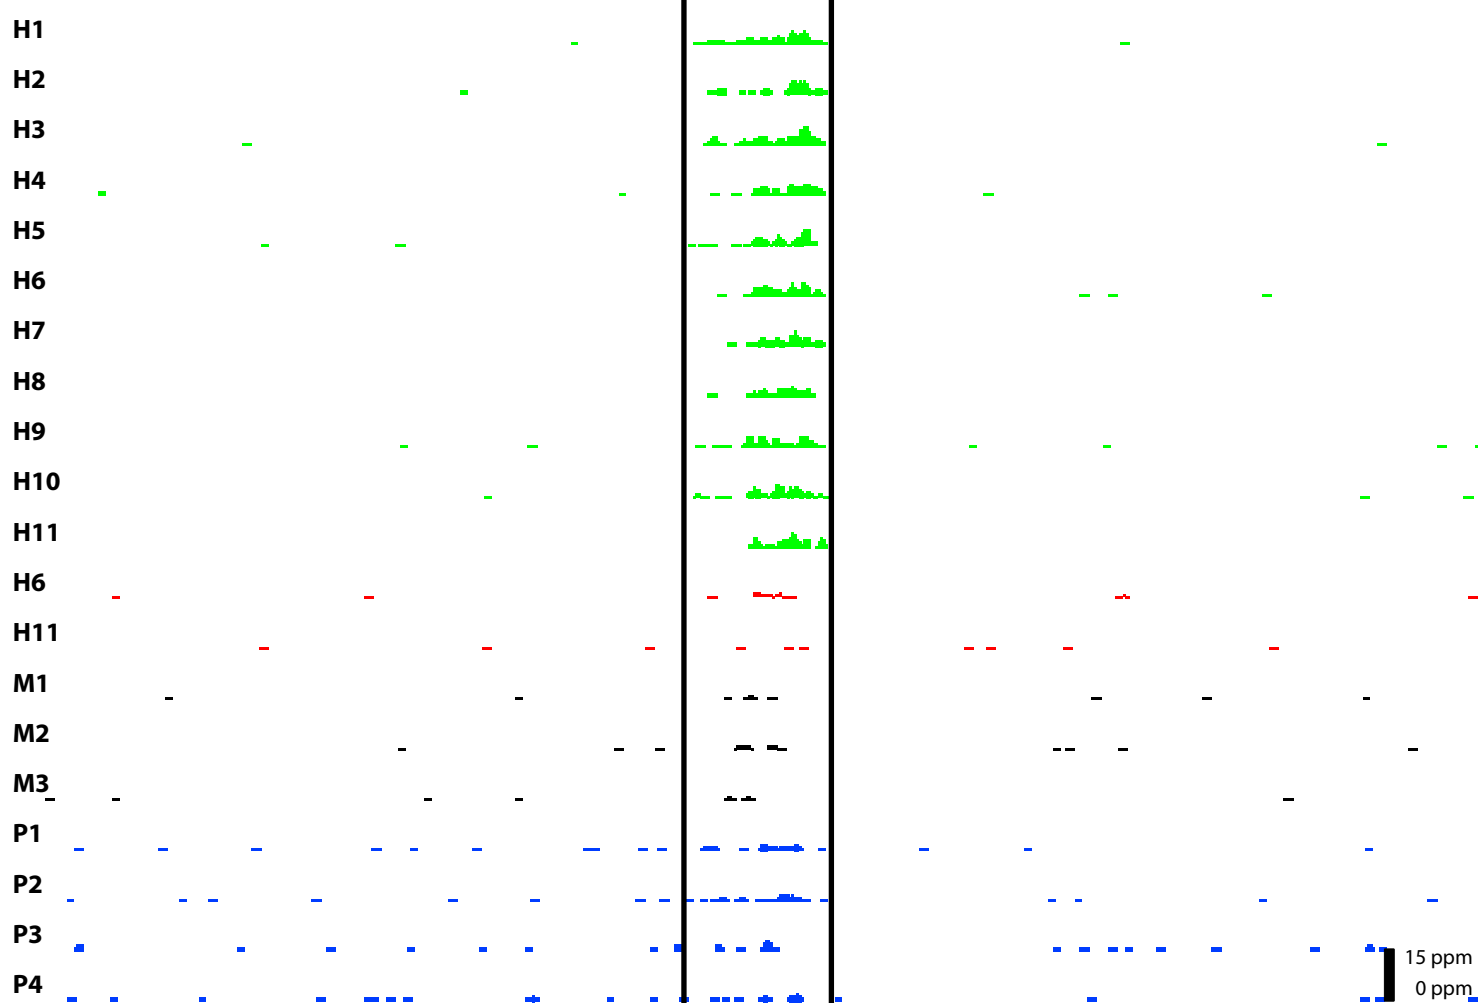

Mapped to RM2

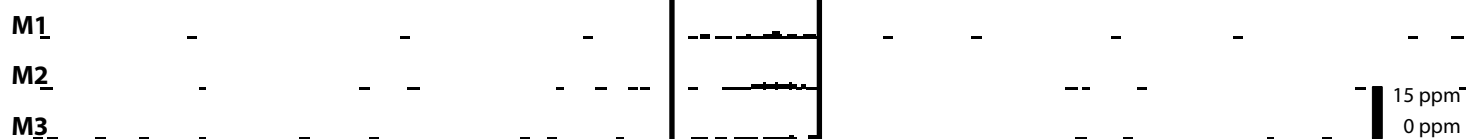

Mapped to PT2

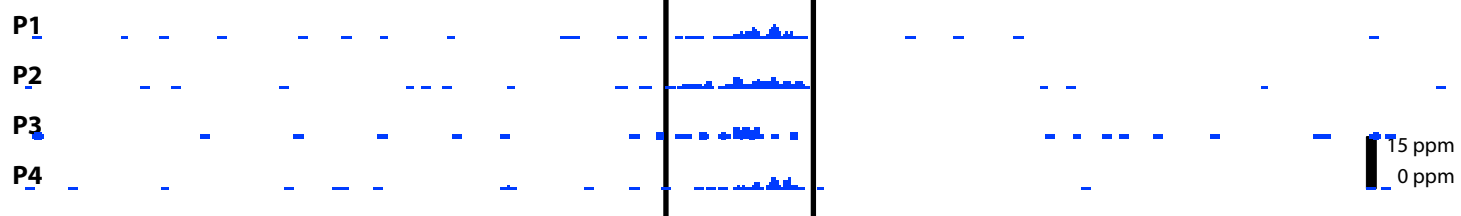

*Known EST*

Mapped to HG19

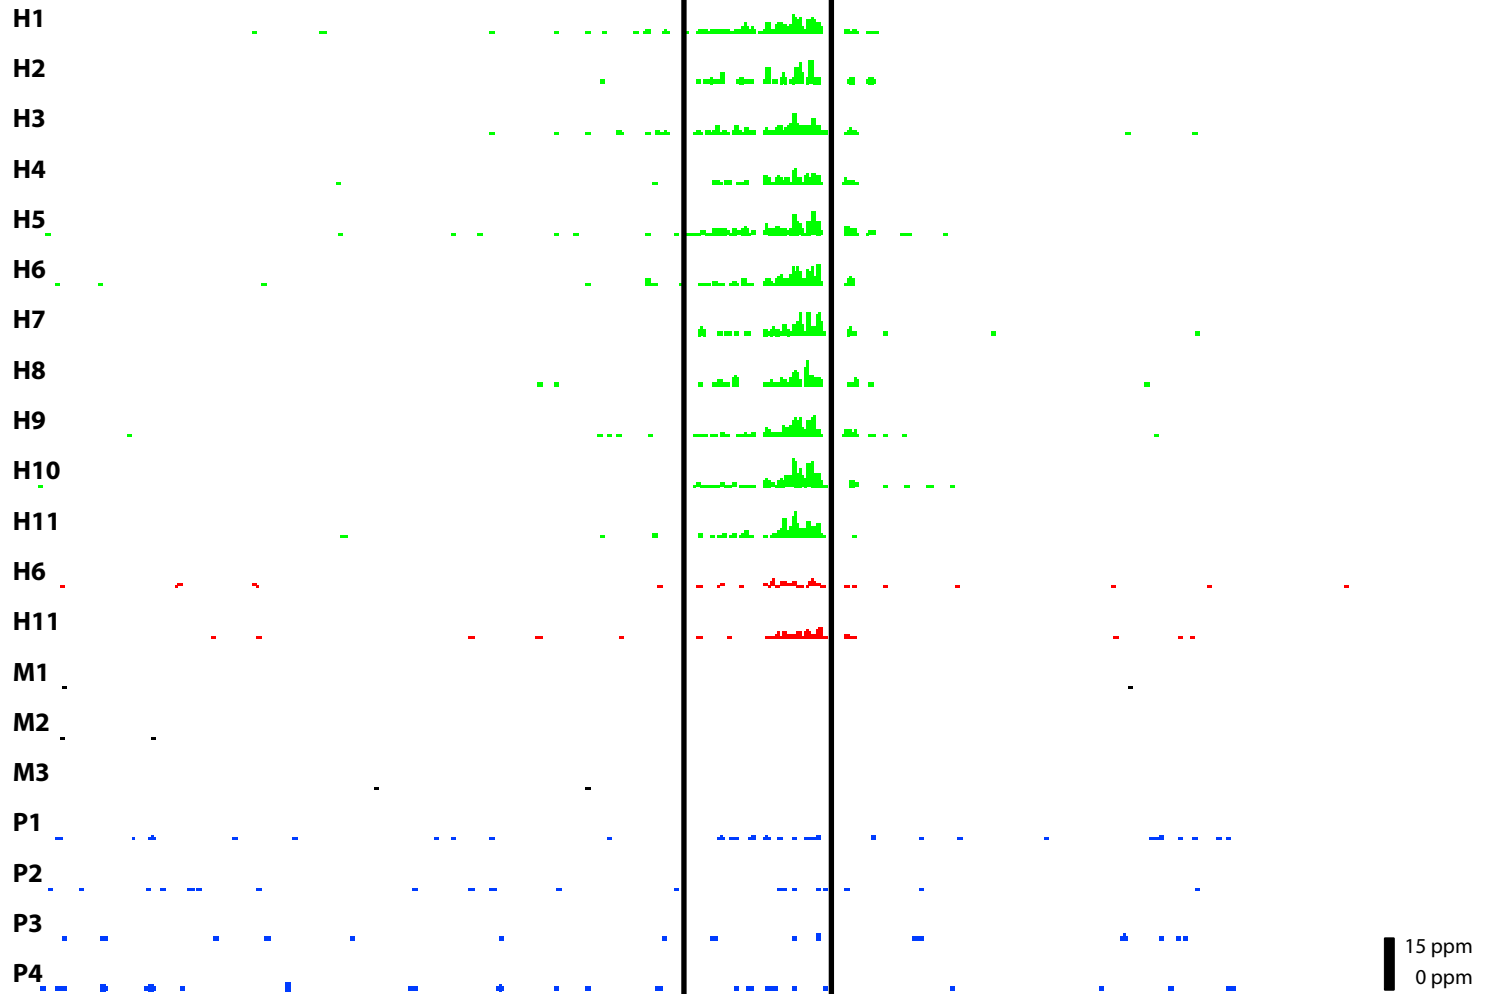

Mapped to RM2

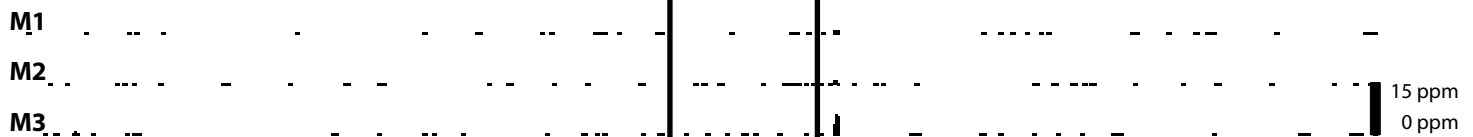

Mapped to PT2

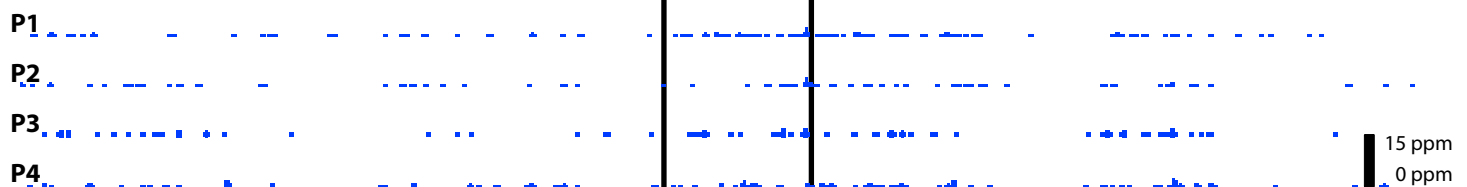

*ADCYAP1*

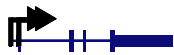

*Known EST*

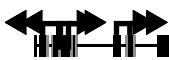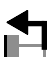

Mapped to HG19

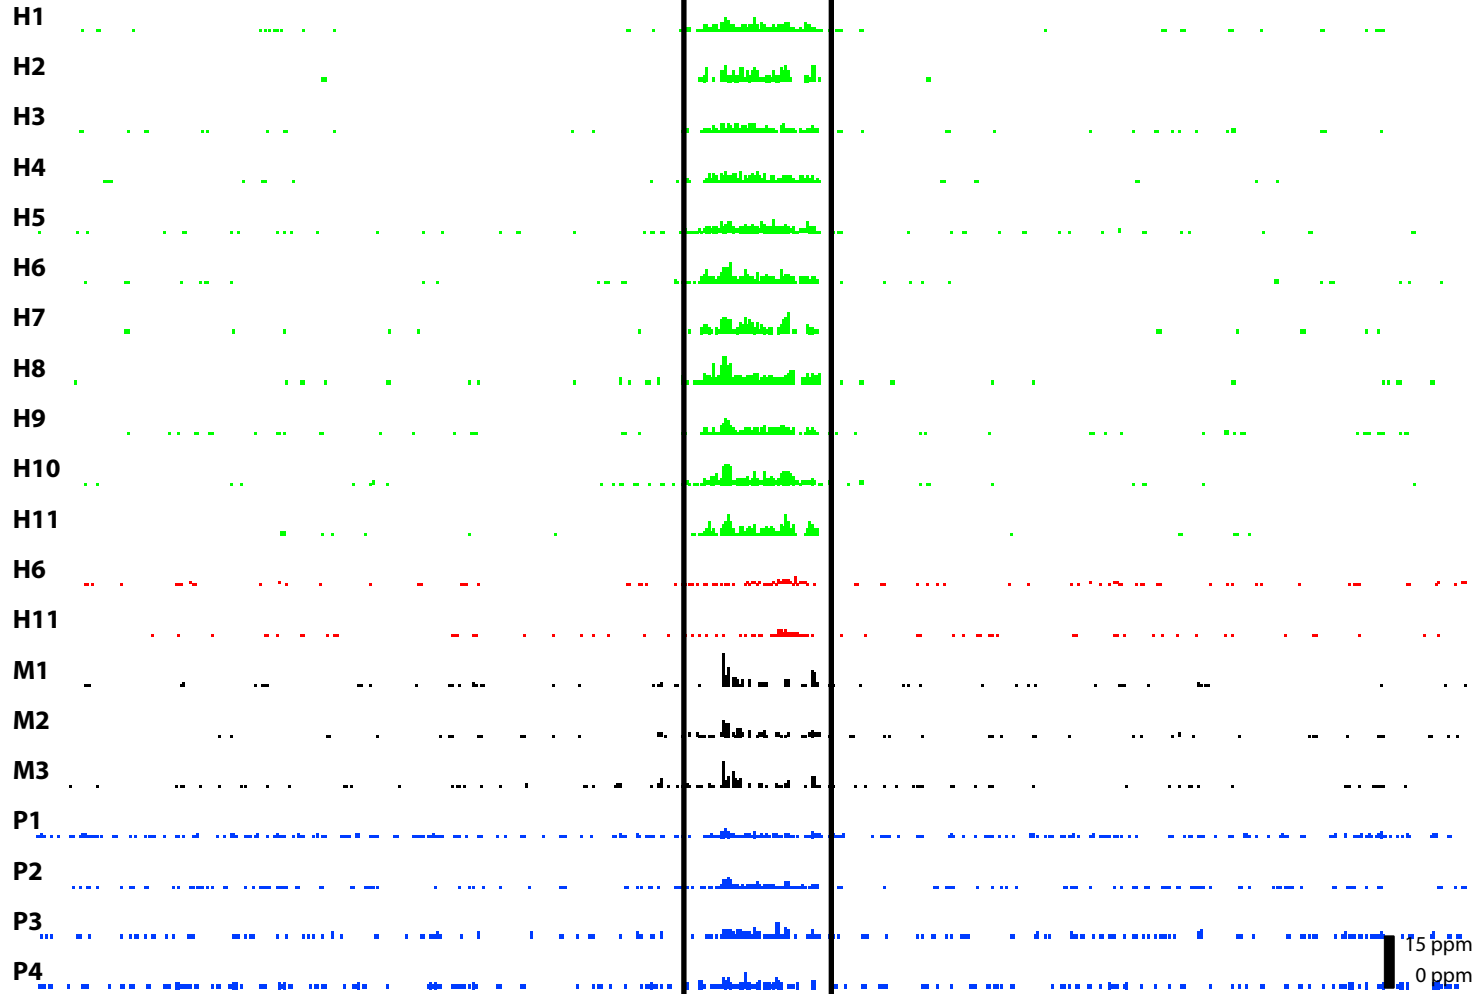

Mapped to RM2

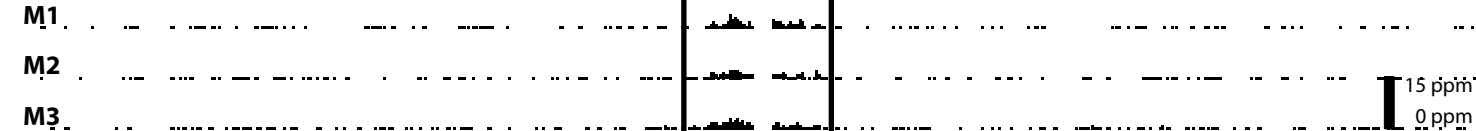

Mapped to PT2

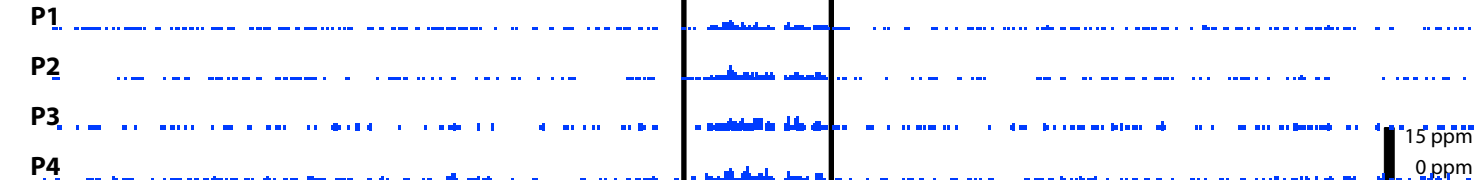

*Known EST*

Mapped to HG19

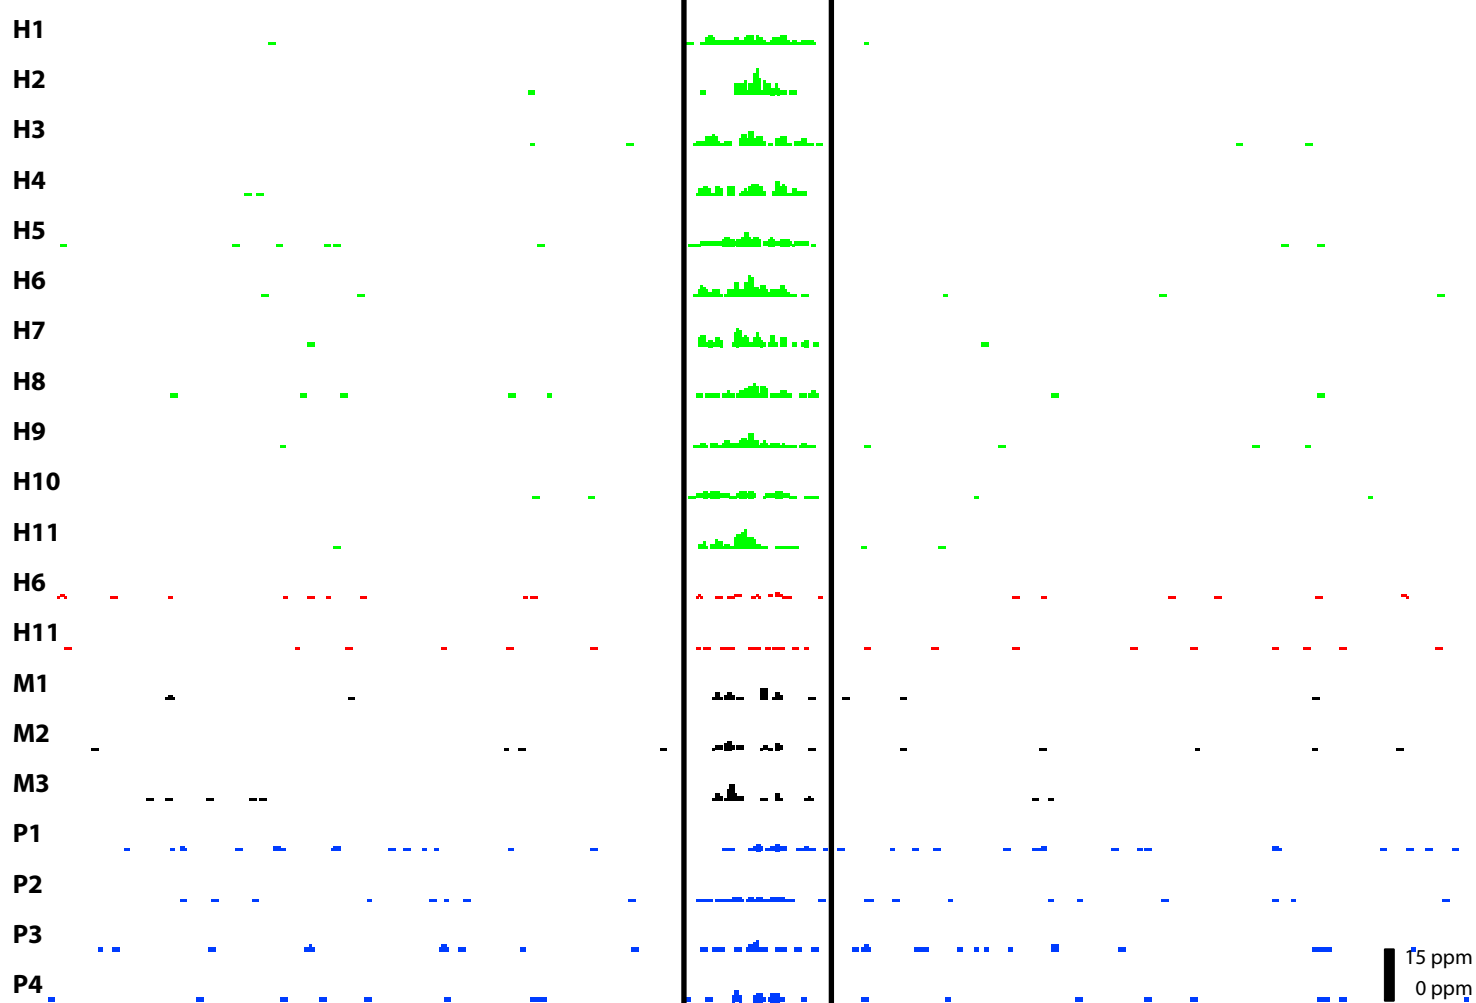

Mapped to RM2

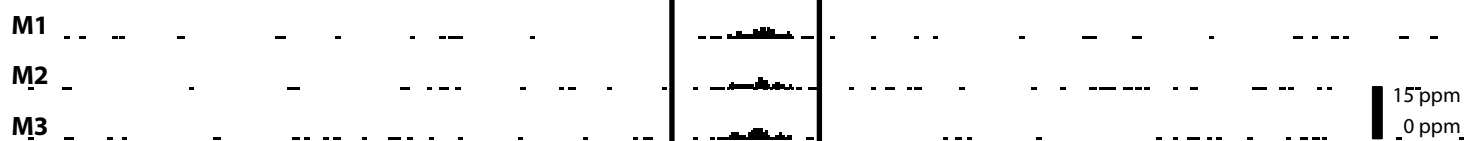

Mapped to PT2

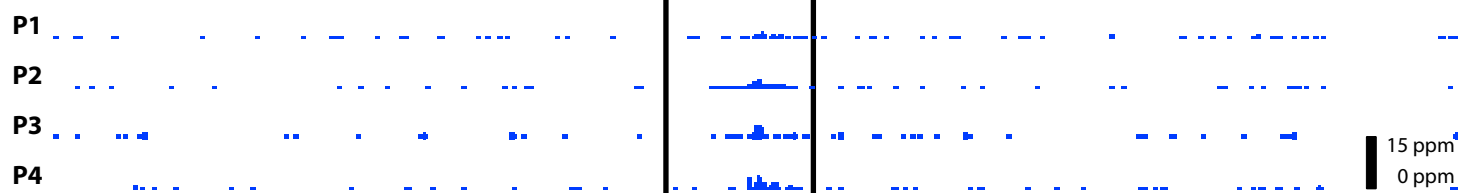

MBP

Known EST

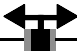

Mapped to HG19

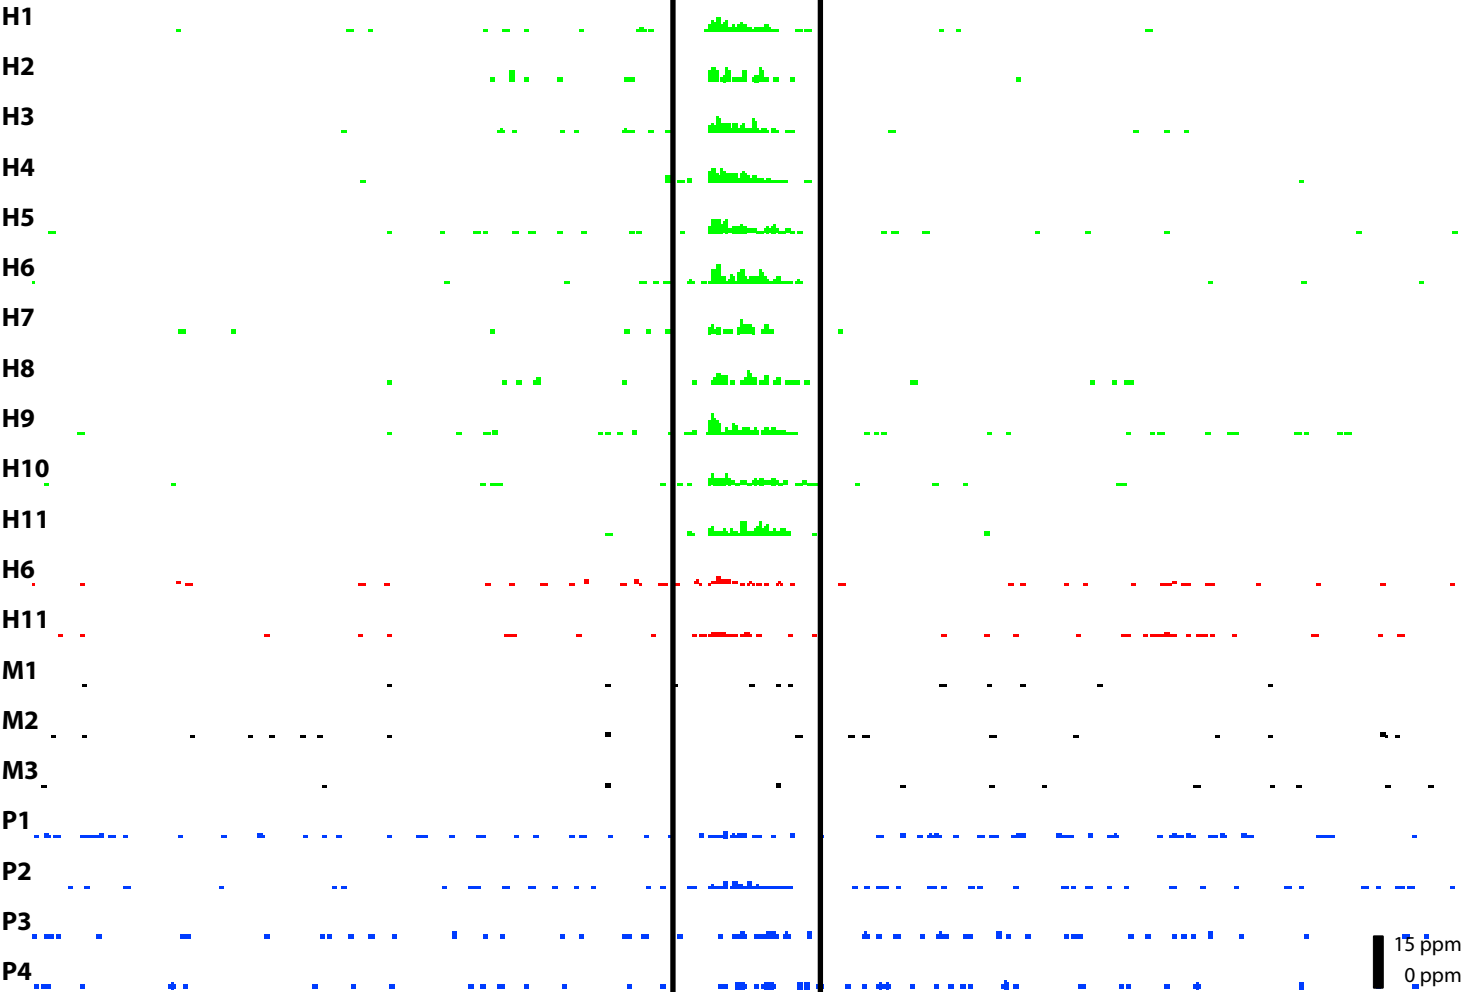

Mapped to RM2

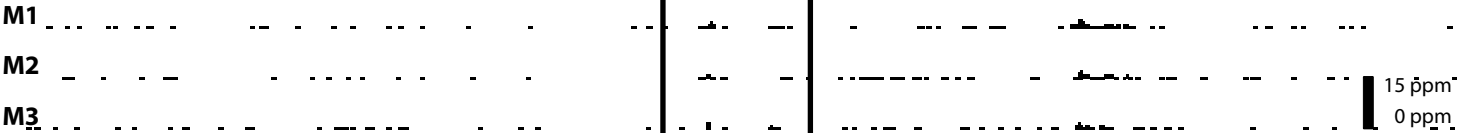

Mapped to PT2

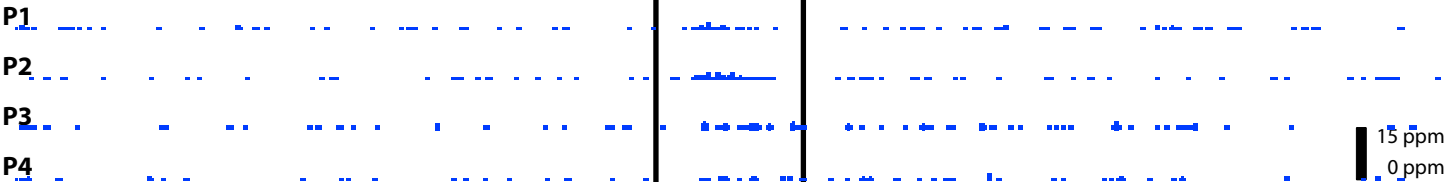

TMEM221

Known EST

Mapped to HG19

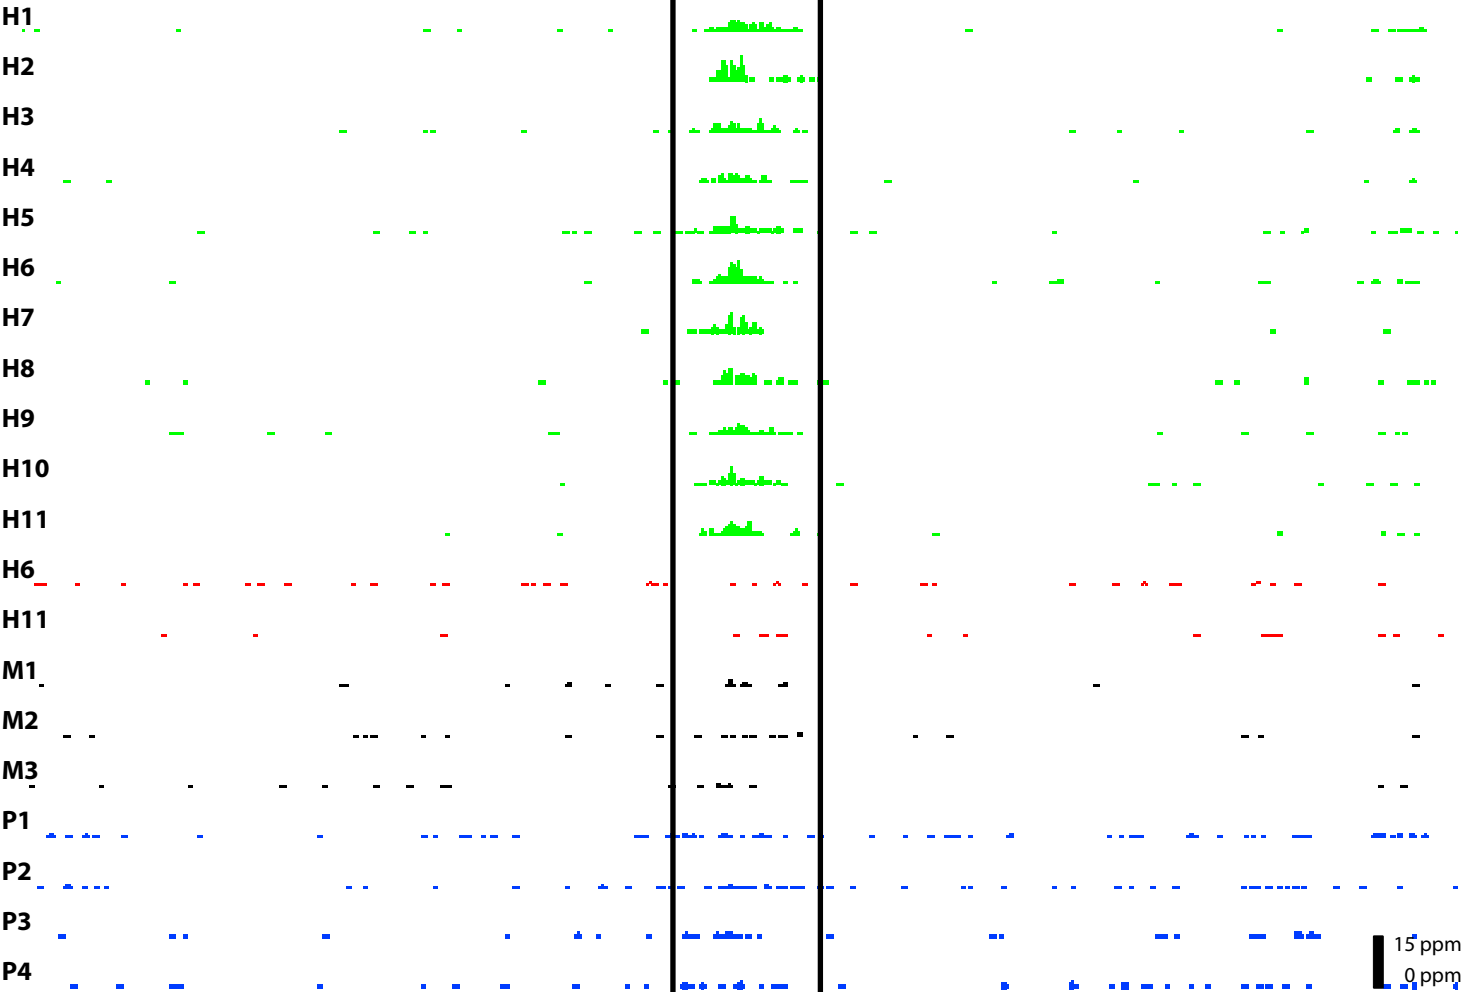

Mapped to RM2

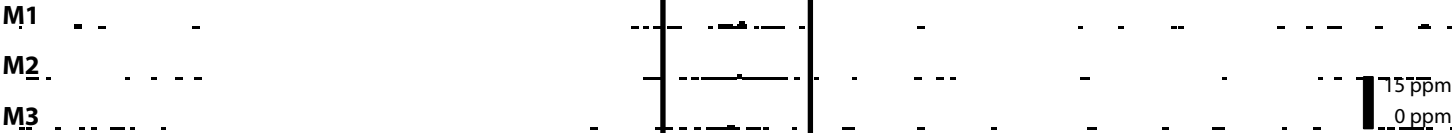

Mapped to PT2

Chr19 51010000

51025000

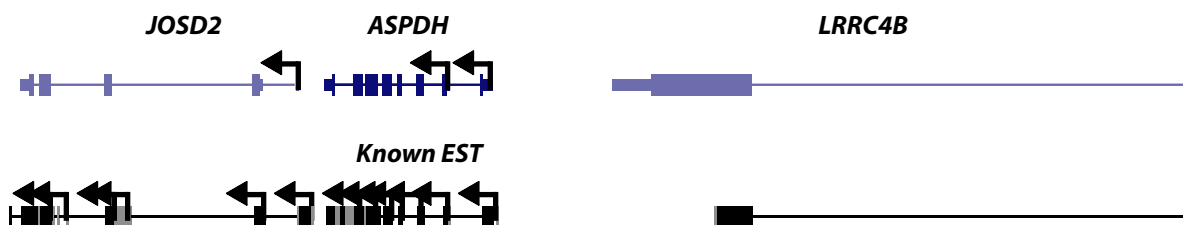

Mapped to HG19

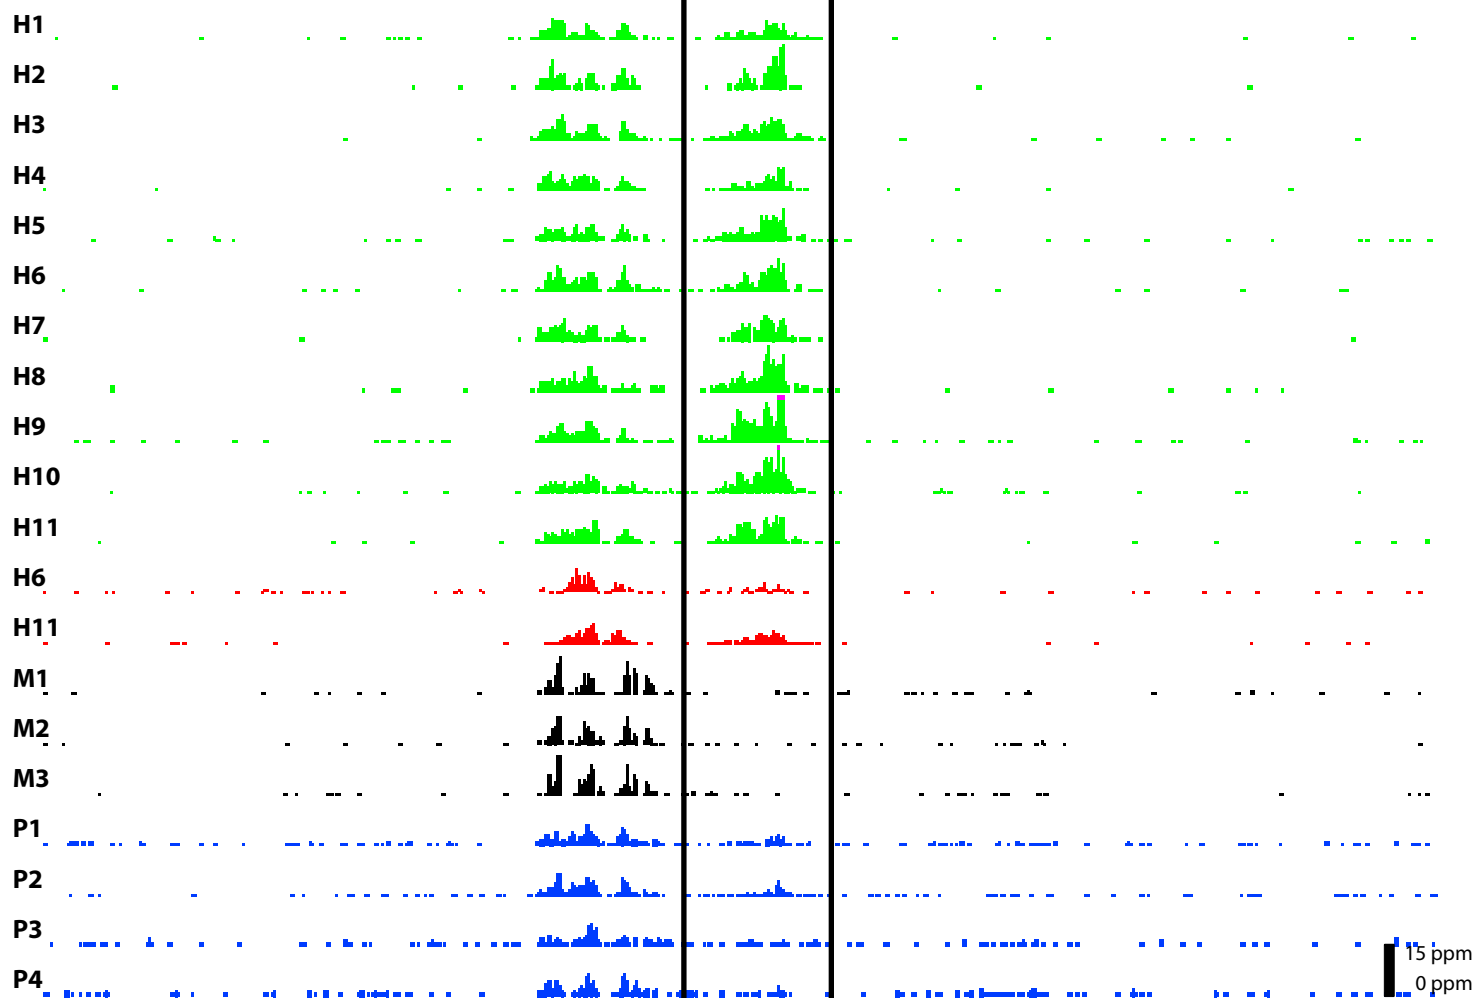

Mapped to RM2

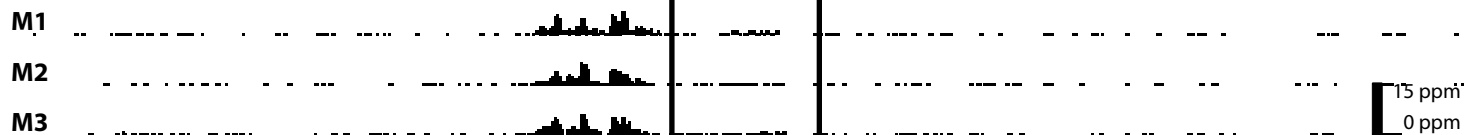

Mapped to PT2

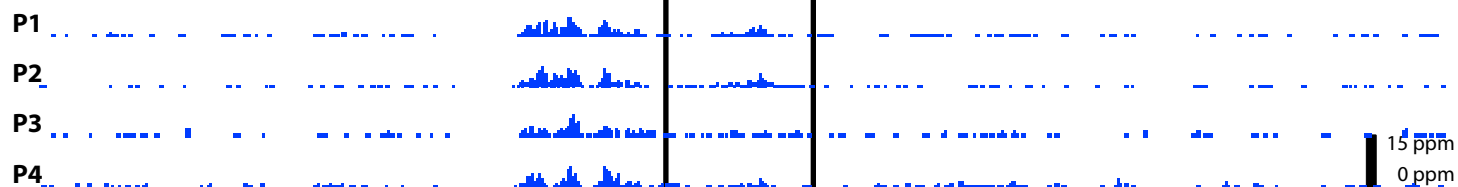

Chr20 325000

335000

*NRSN2*

Known EST

Mapped to HG19

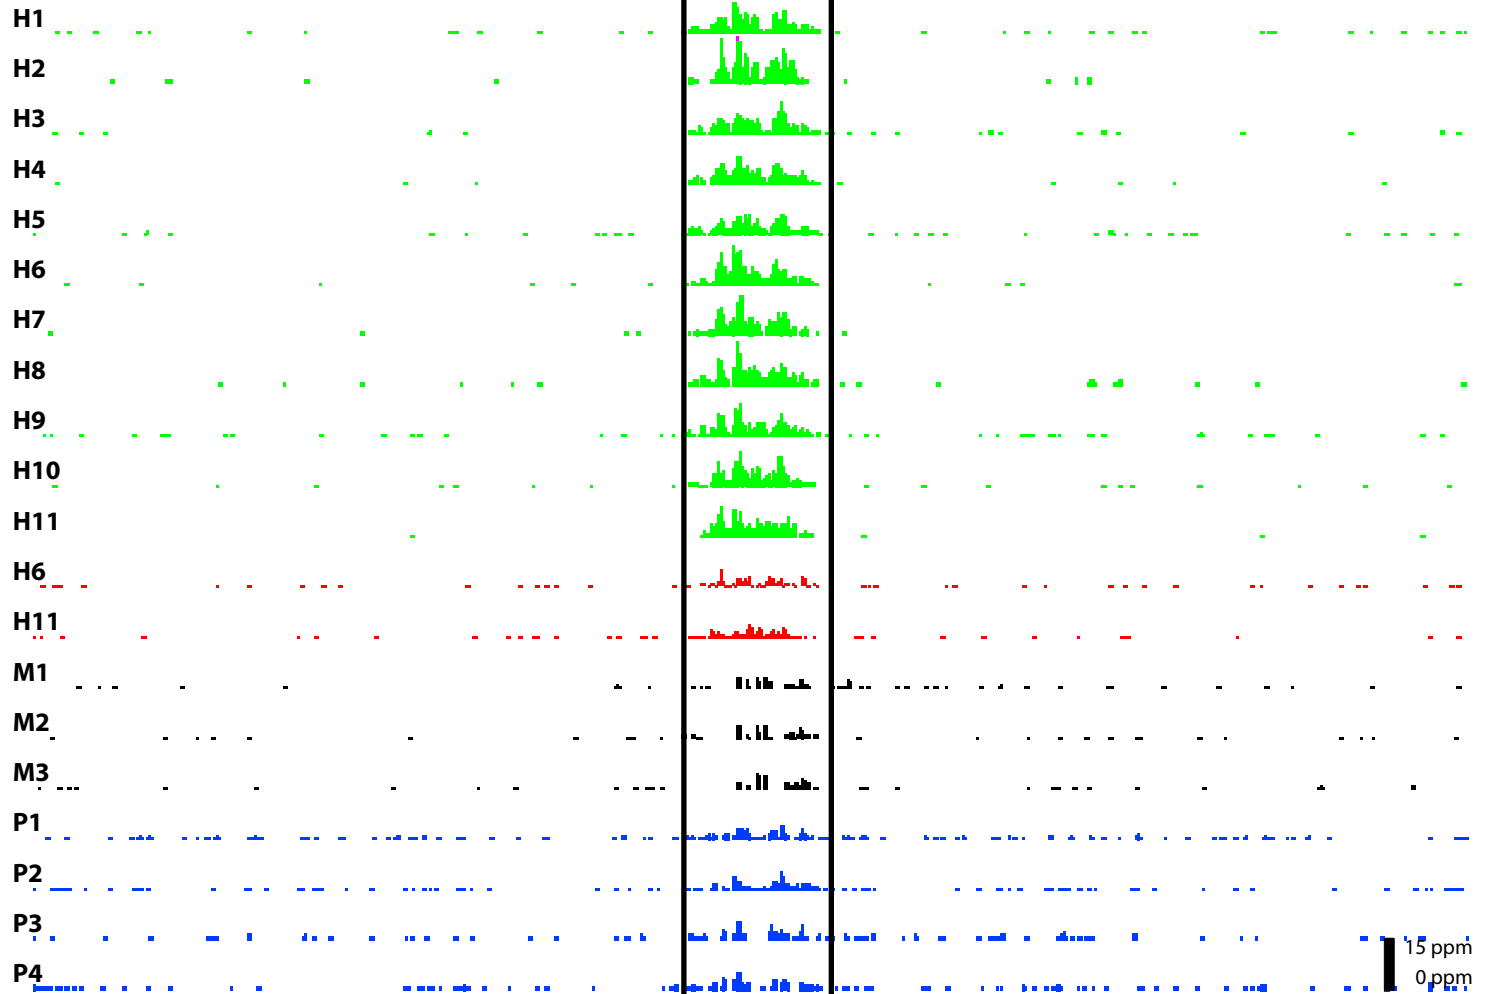

Mapped to RM2

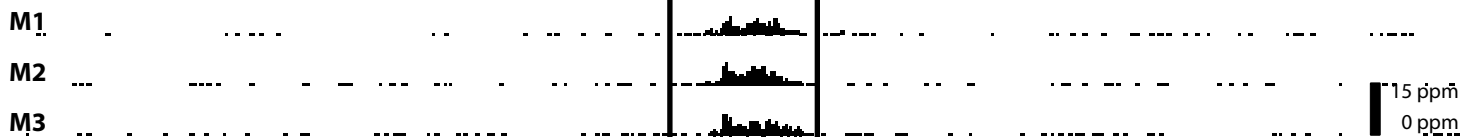

Mapped to PT2

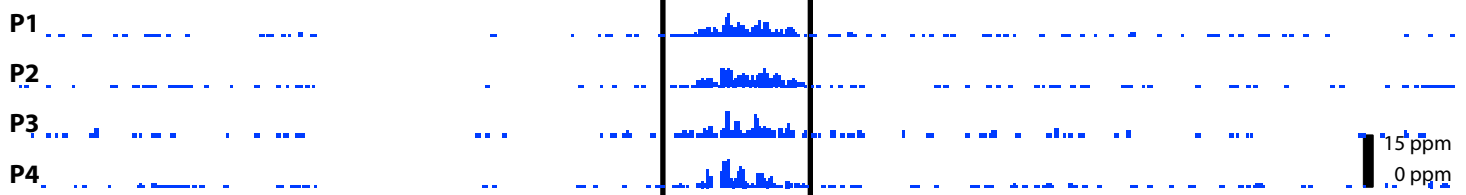

Chr20 360000

370000

*TRIB3*

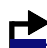

*Known EST*

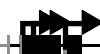

Mapped to HG19

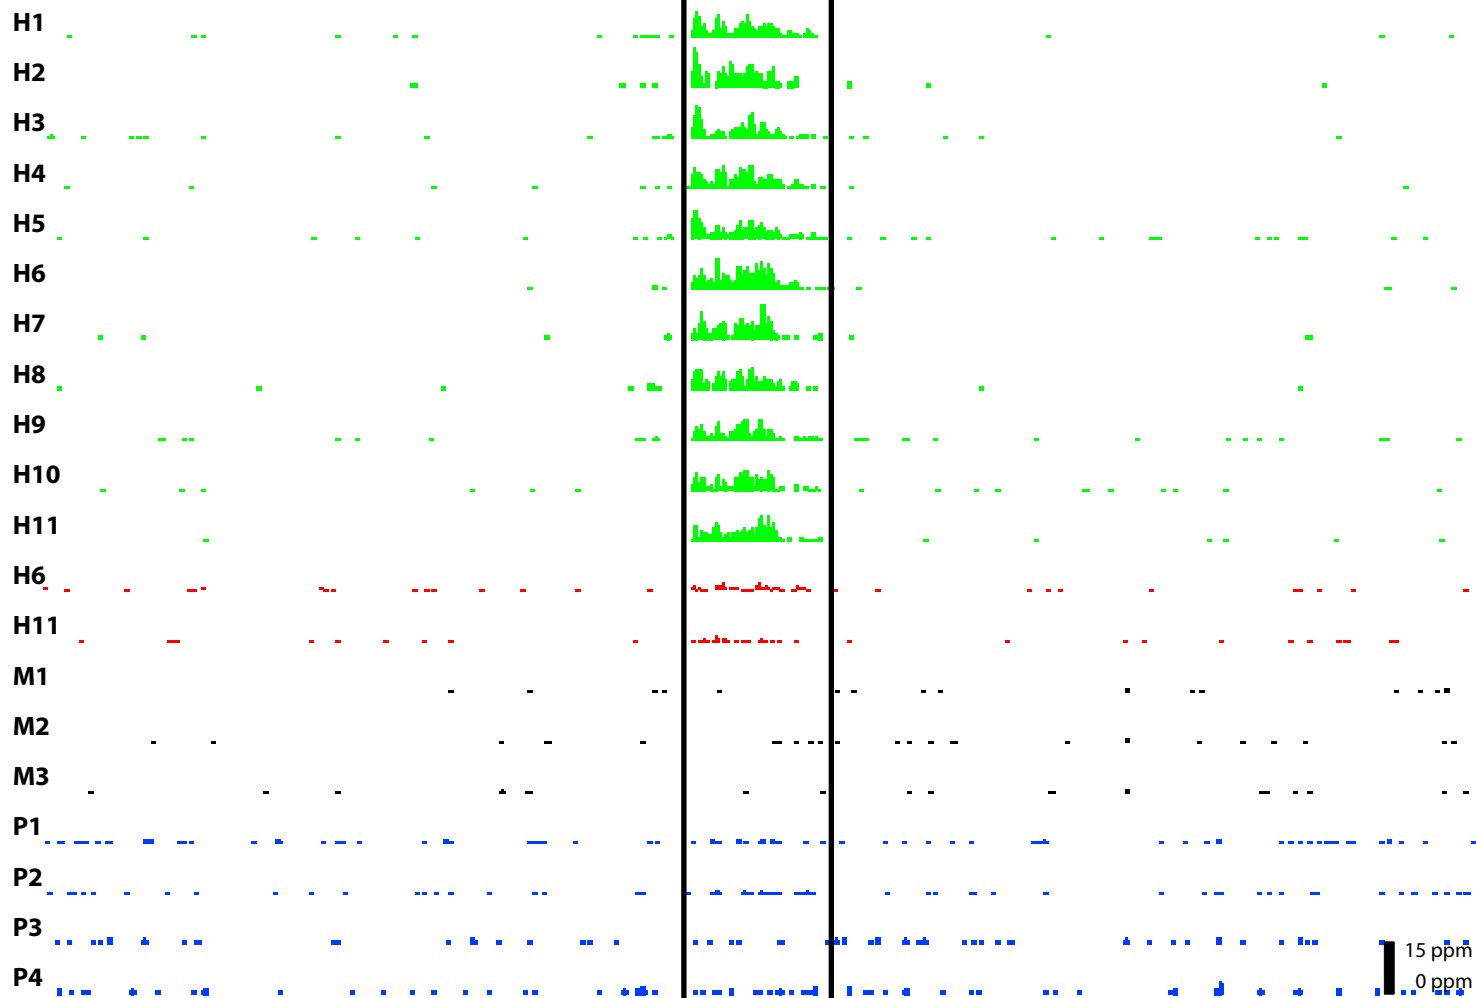

Mapped to RM2

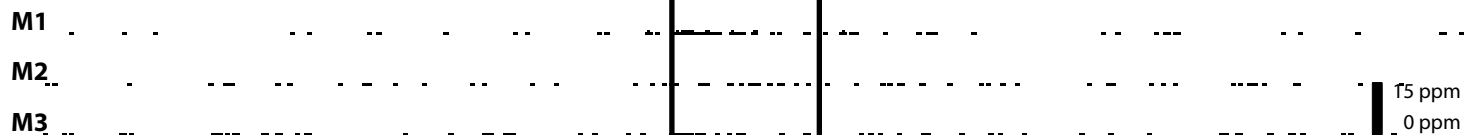

Mapped to PT2

*Known EST*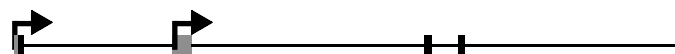

Mapped to HG19

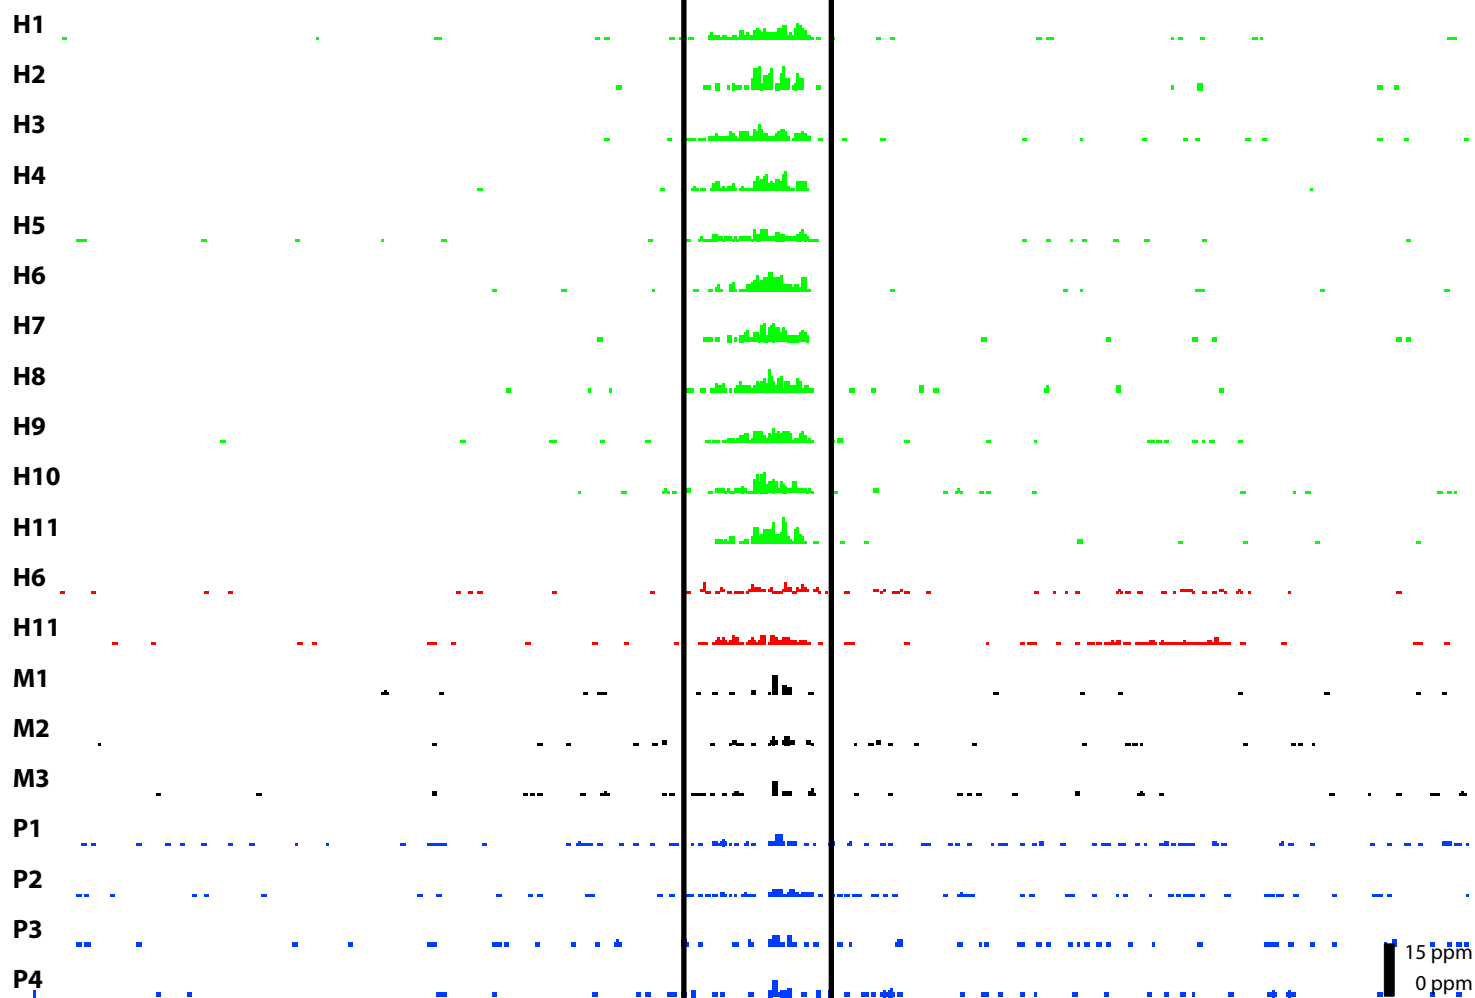

Mapped to RM2

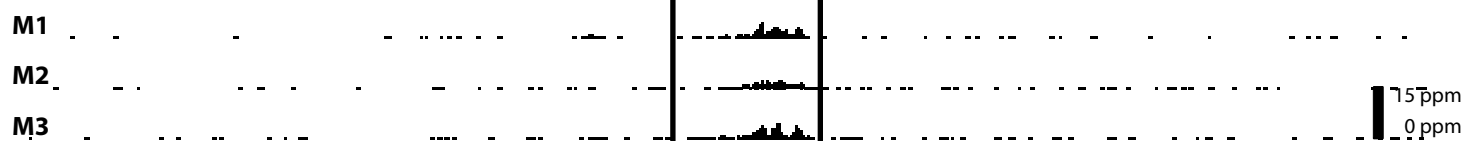

Mapped to PT2

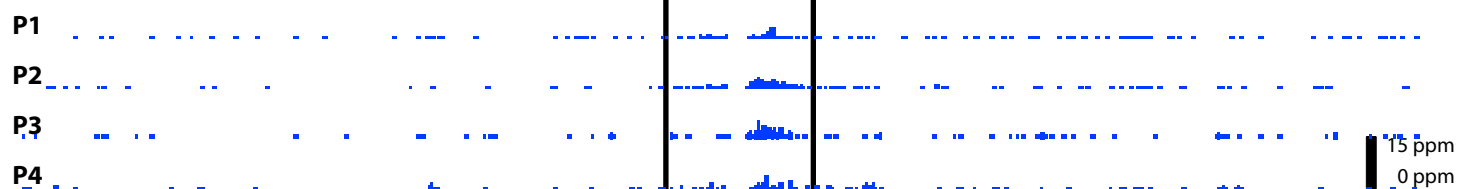

Chr20 5483000

5488000

*LOC149837*

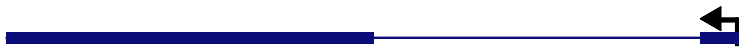

*Known EST*

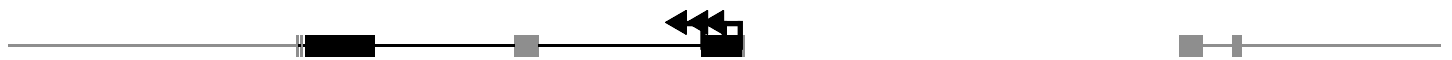

Mapped to HG19

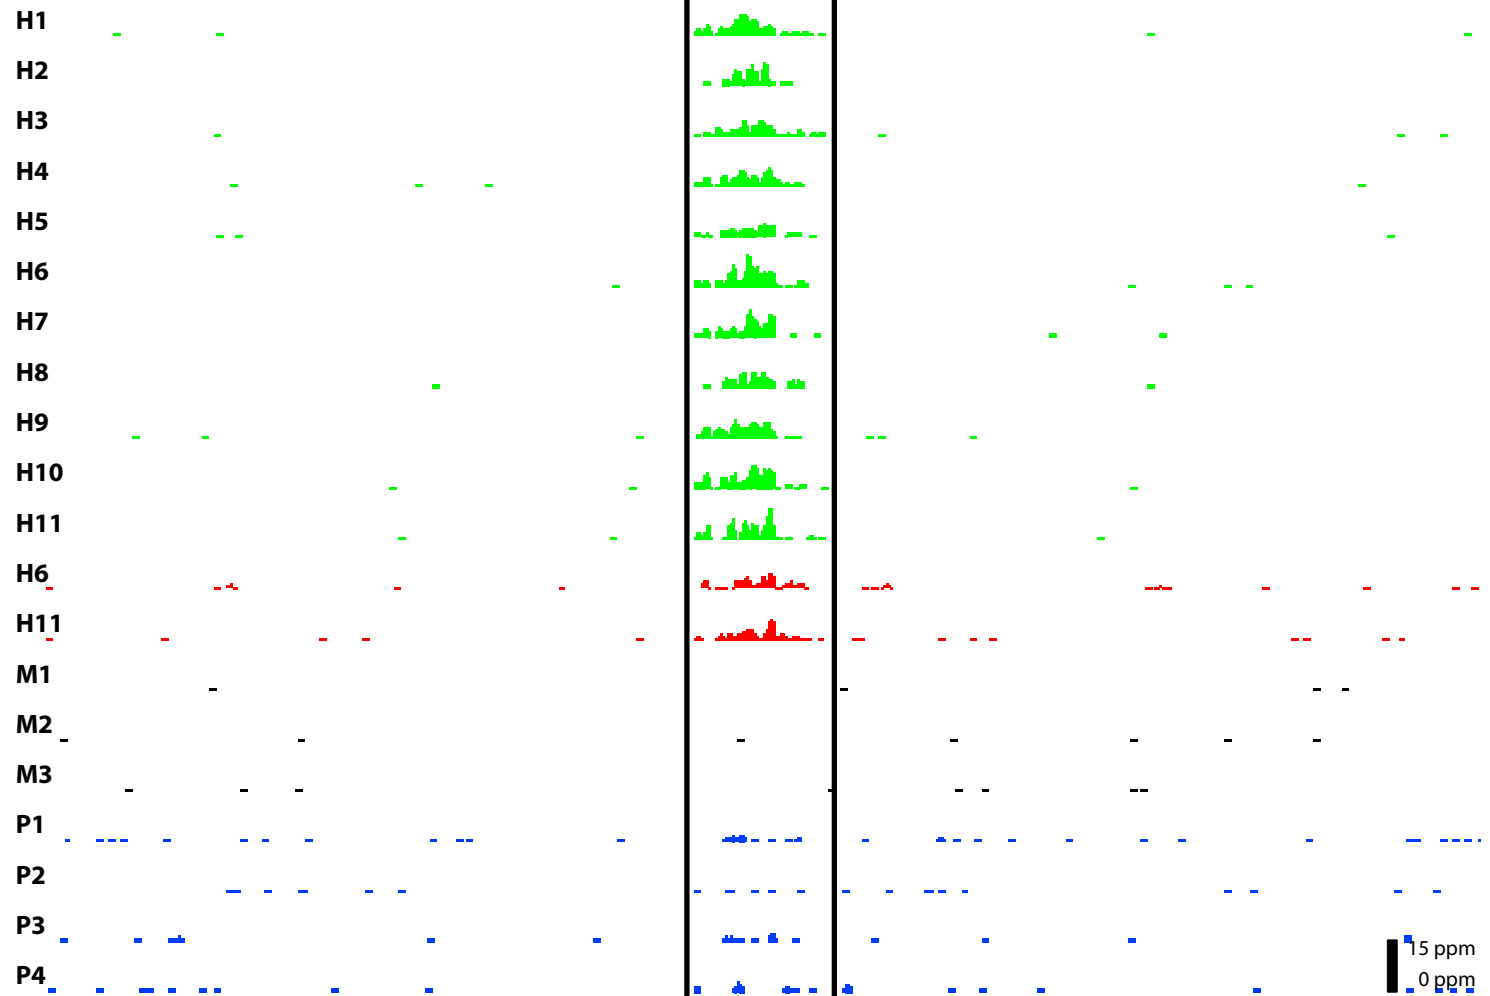

Mapped to RM2

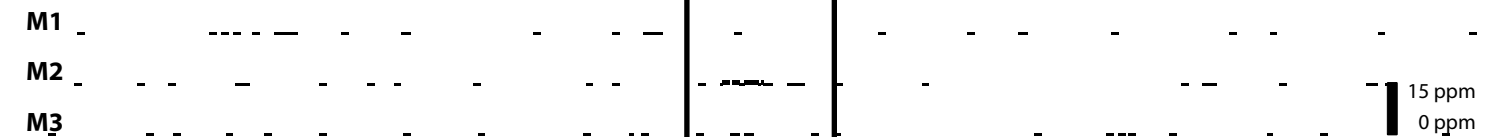

Mapped to PT2

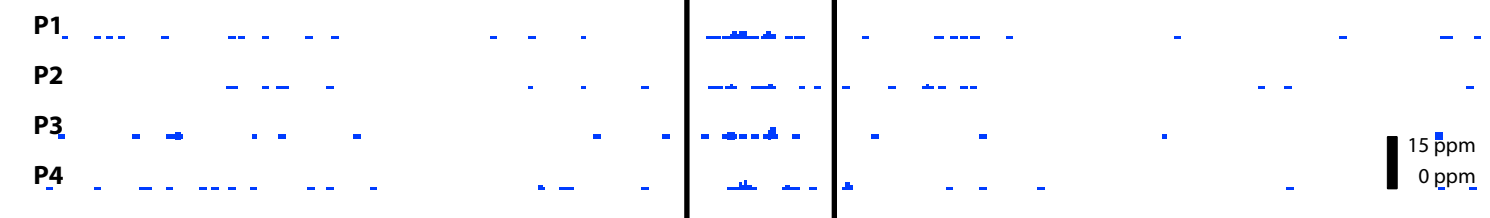

Chr22 27035000

27050000

*CRYBA4*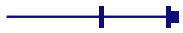*MIAT*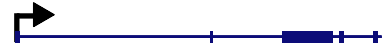

Known EST

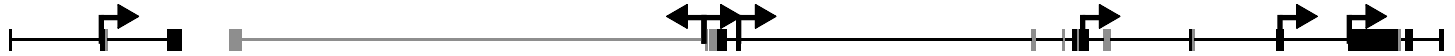

Mapped to HG19

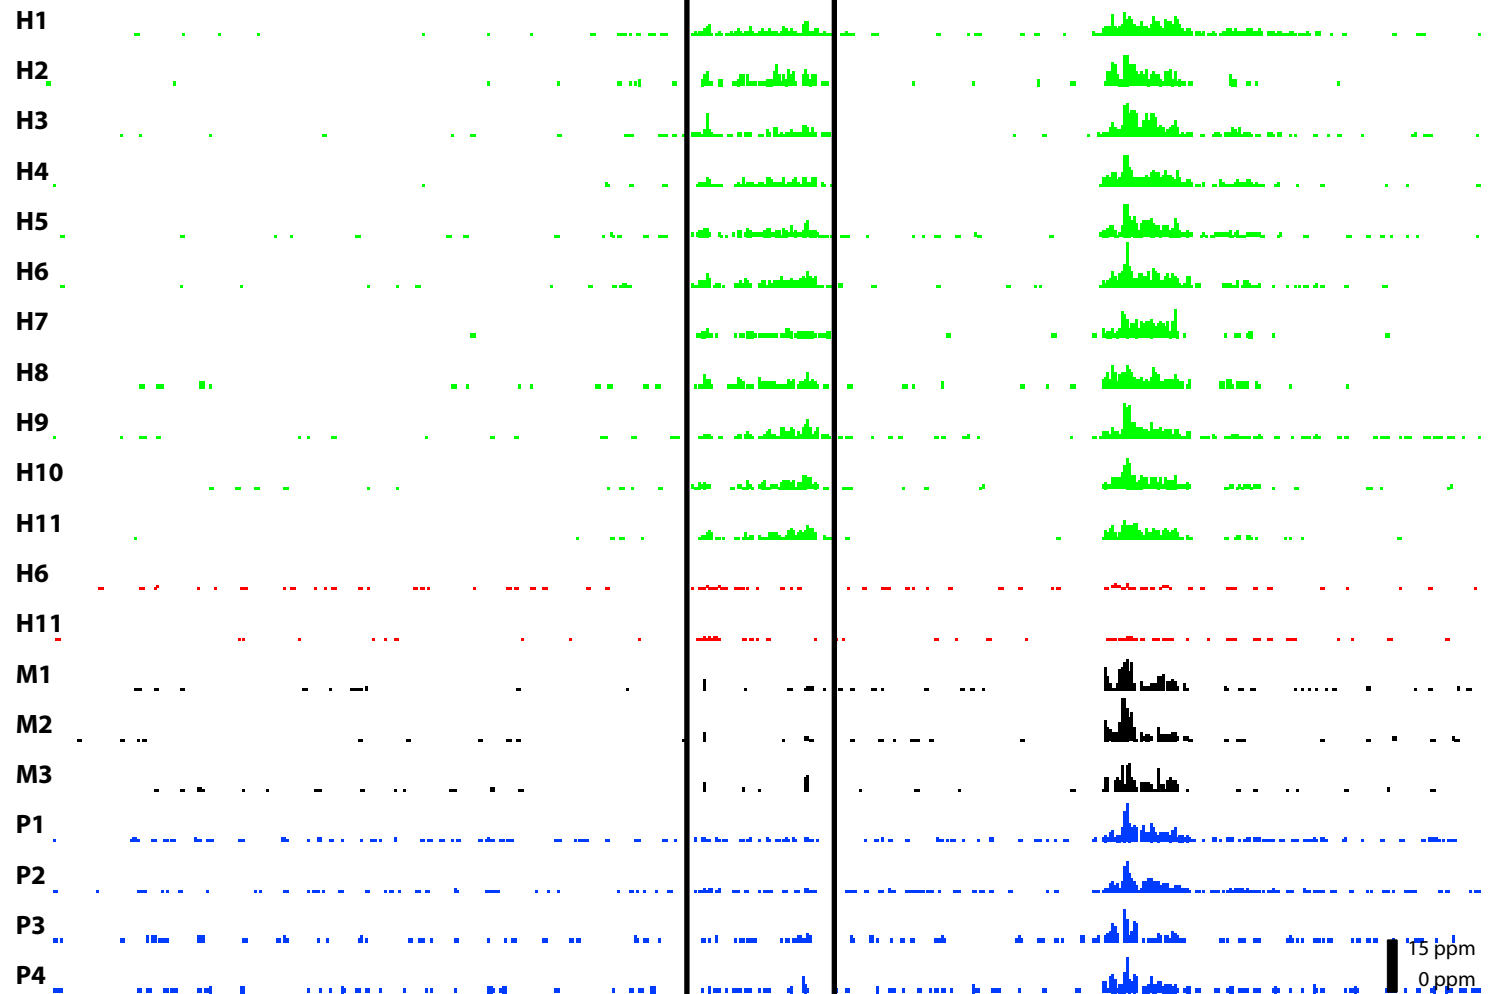

Mapped to RM2

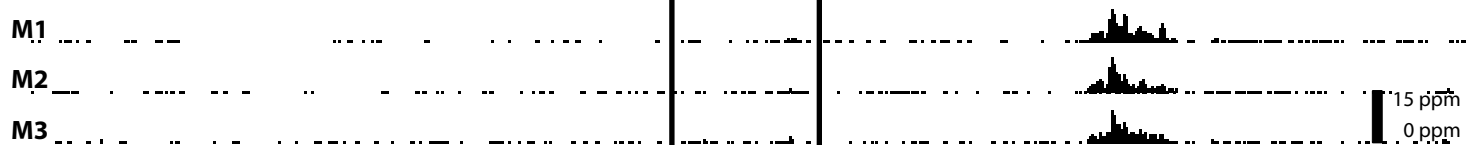

Mapped to PT2

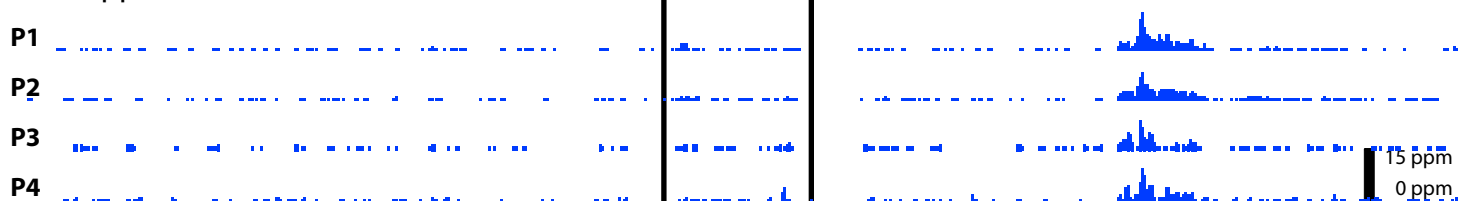

TBC1D22A

Known EST

Mapped to HG19

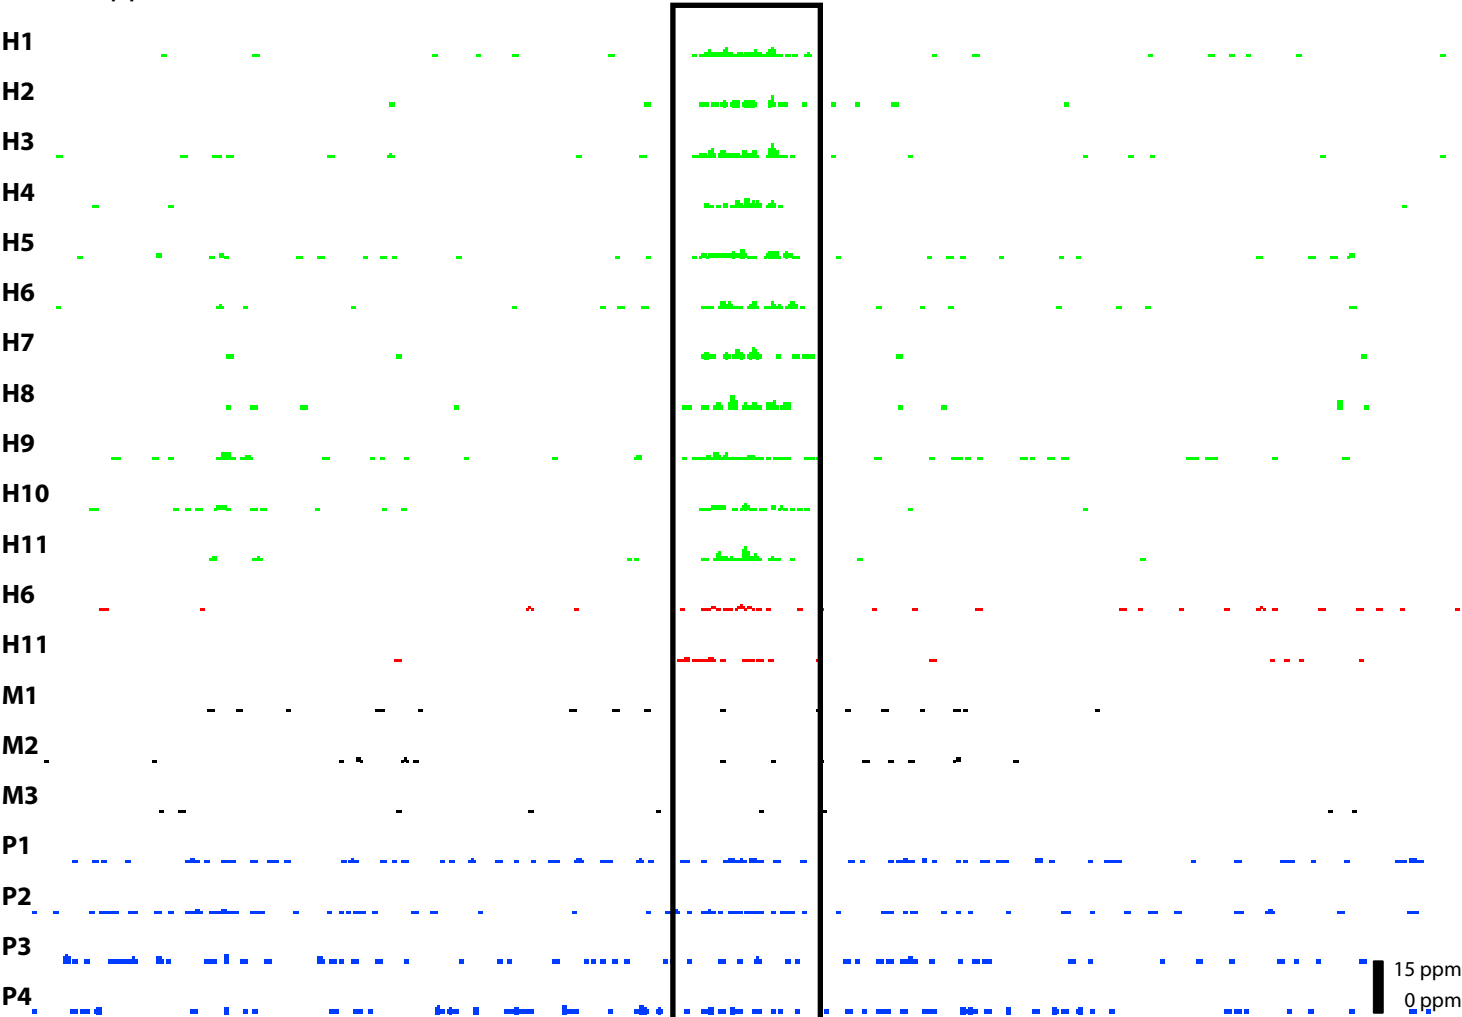

Mapped to RM2

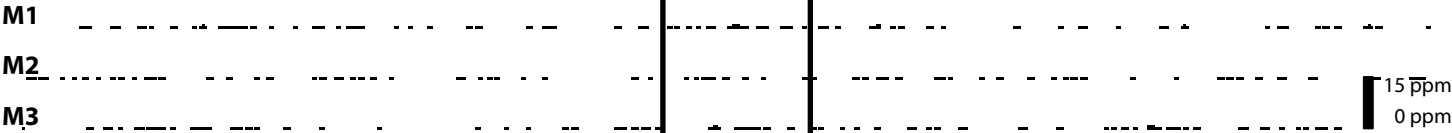

Mapped to PT2

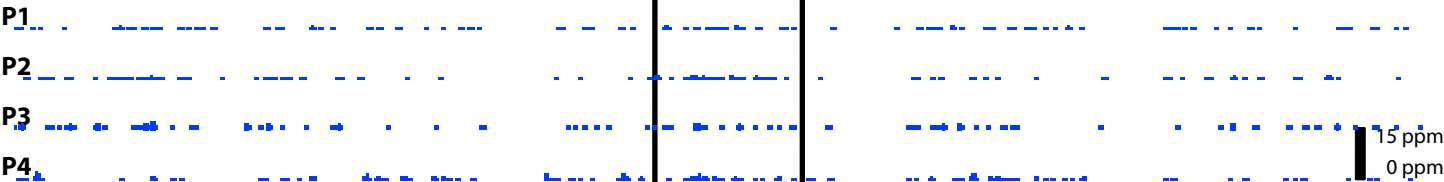

Supplement: Figure S1 — H3K4me3 ChIP-seq browser tracks (UCSC) for neuHP peaks with >2-fold gain in human PFC, compared to chimpanzee and macaque. y-Axis represents normalized tag densities (0–15, ppm) after annotation to the three reference genomes (HG19, rheMac2 = RM2, panTro2 = PT2). (PDF) [file pbio.1001427.s001.pdf]
