# Supplementary material for: Human-Specific Histone Methylation Signatures at Transcription Start Sites in Prefrontal Neurons
Source: PubMed Central journal article supplement (PMC3502543; doi:10.1371/journal.pbio.1001427), 2012-11-20

**Supplementary Figure 2 (Shulha et al):**

UCSC genome browser tracks showing RNA sequence tags in human (orange), macaque (green) and chimpanzee (brown) prefrontal cortex in region surrounding the human-specific H3K4me3 peak (shown as black bar, top). Human tracks represent original data, data for macaque (chimpanzee) RNA expression from GSE24538 (GSE30352).

HUMAN 10x around H3K4me3 peak

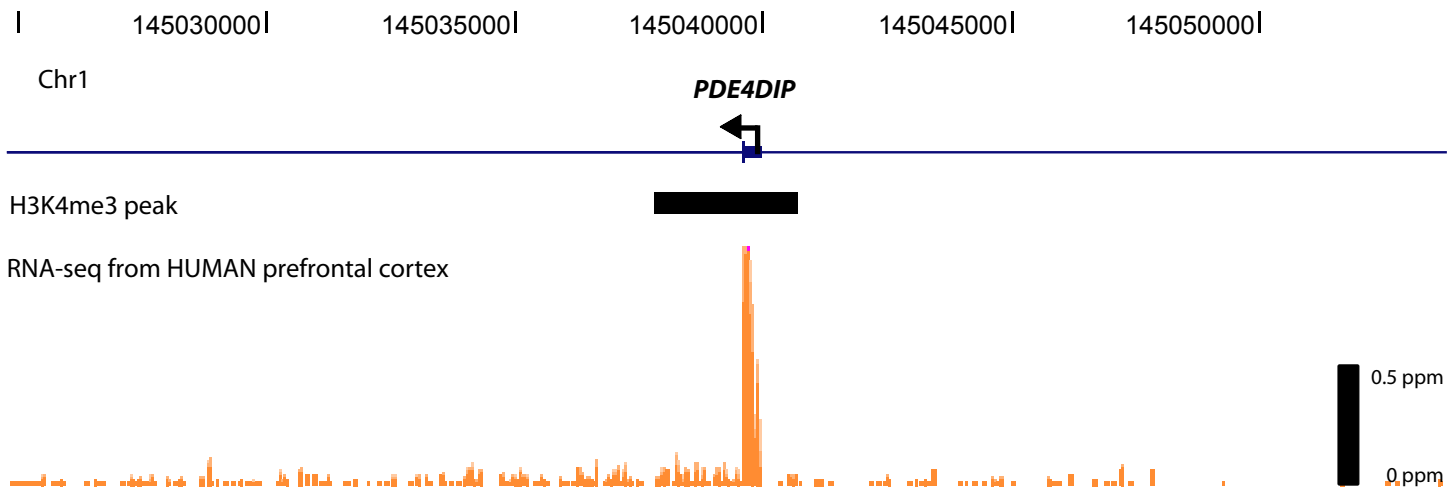

MACAQUE 10x lifted-over around H3K4me3 peak

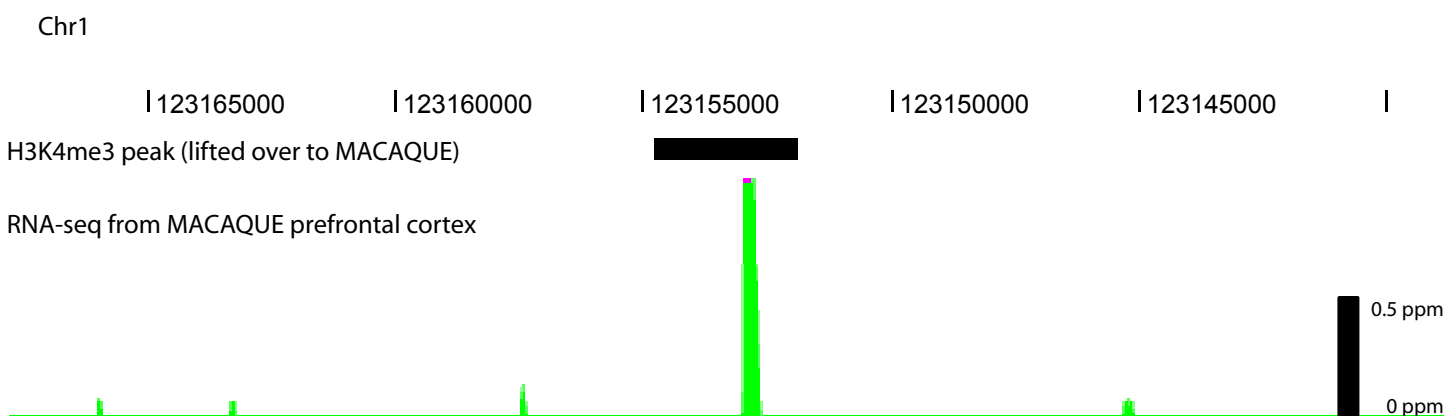

CHIMPANZEE 10x lifted-over around H3K4me3 peak

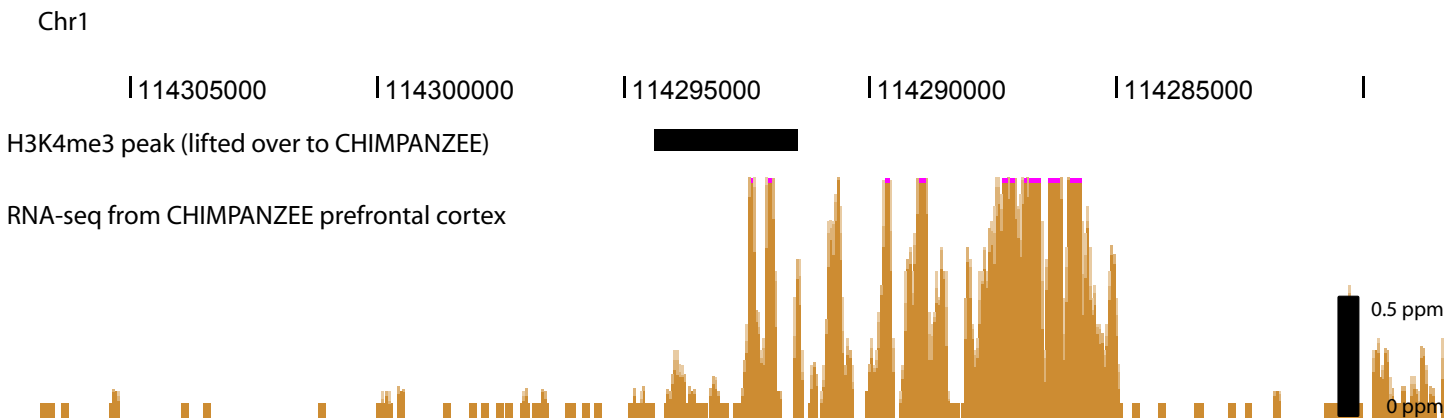

HUMAN 10x around H3K4me3 peak

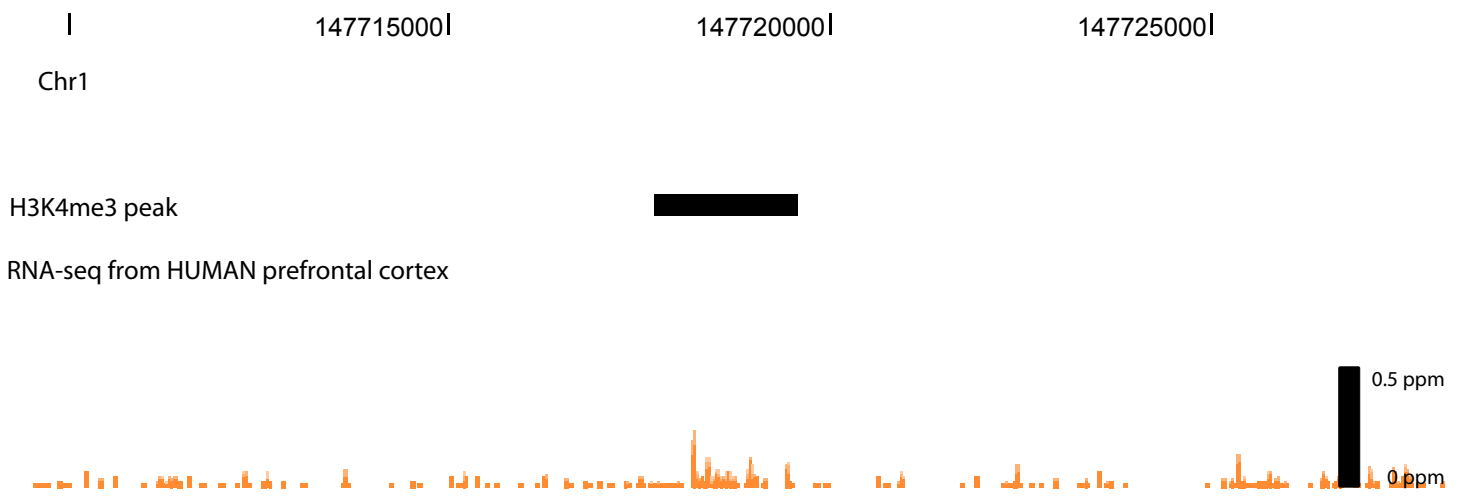

MACAQUE 10x lifted-over around H3K4me3 peak

H3K4me3 peak (lifted over to MACAQUE)

RNA-seq from MACAQUE prefrontal cortex

CHIMPANZEE 10x lifted-over around H3K4me3 peak

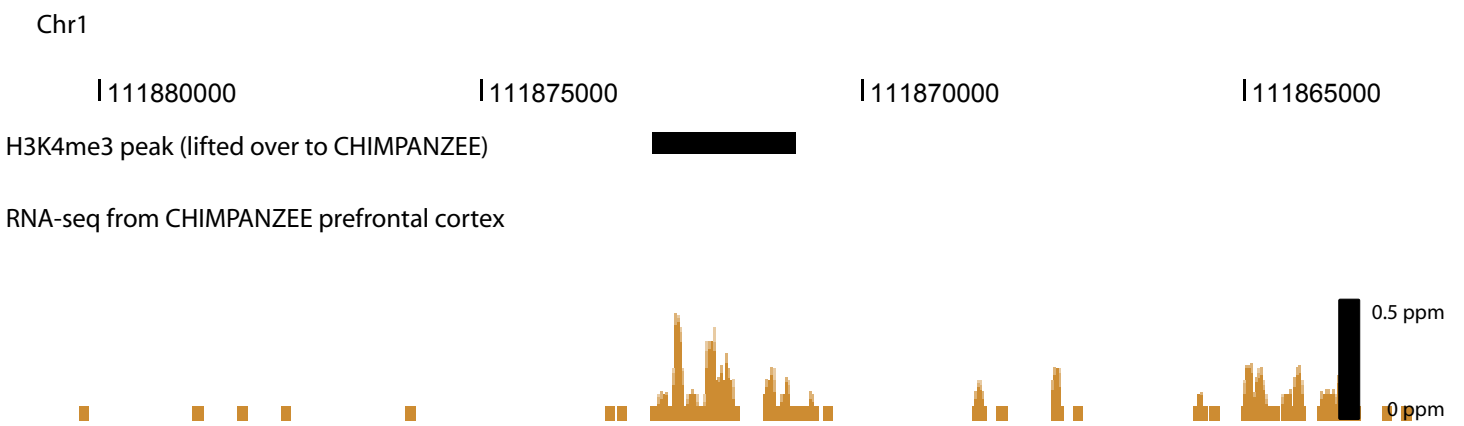

HUMAN 10x around H3K4me3 peak

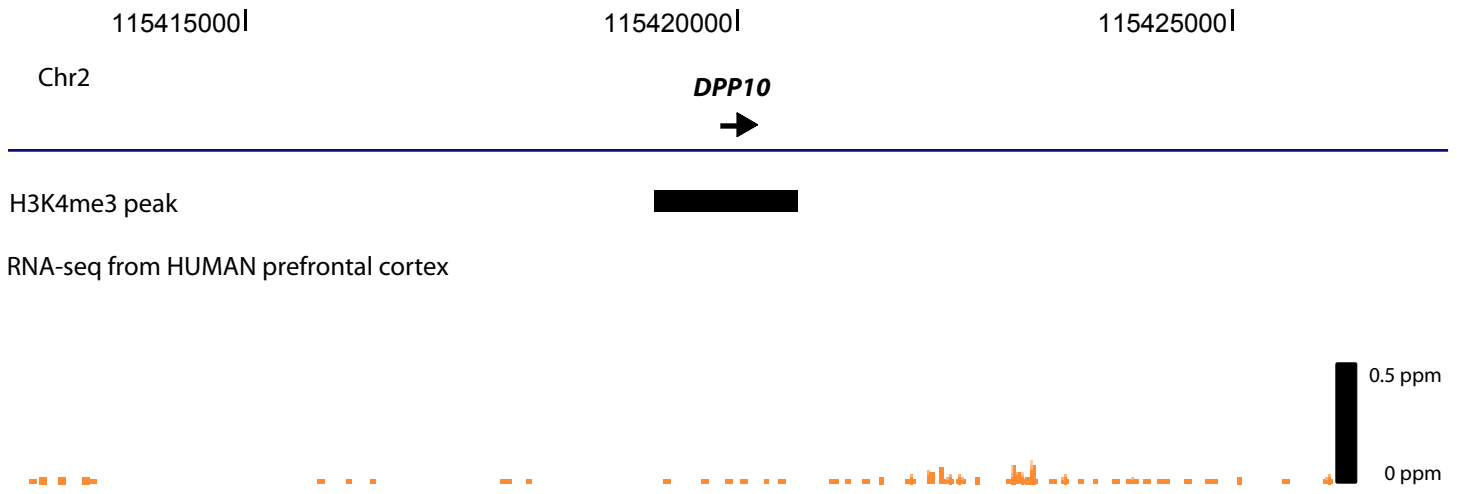

MACAQUE 10x lifted-over around H3K4me3 peak

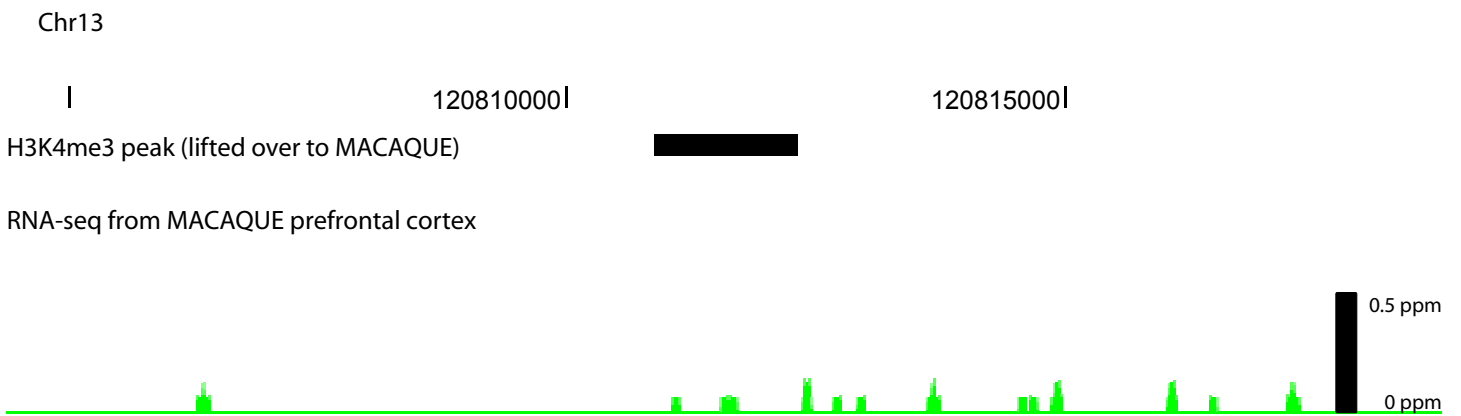

CHIMPANZEE 10x lifted-over around H3K4me3 peak

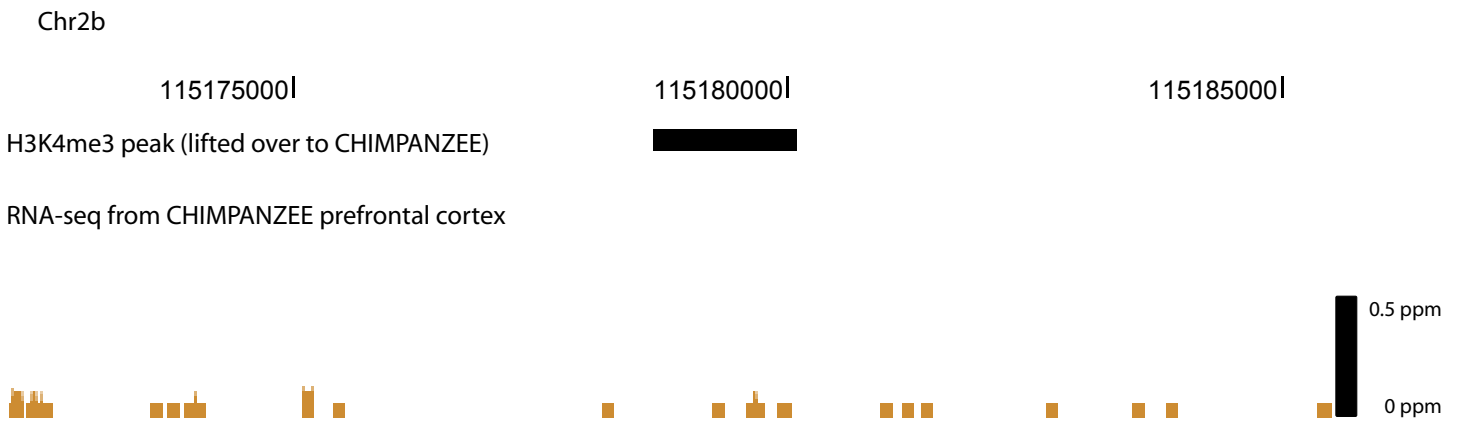

HUMAN 10x around H3K4me3 peak

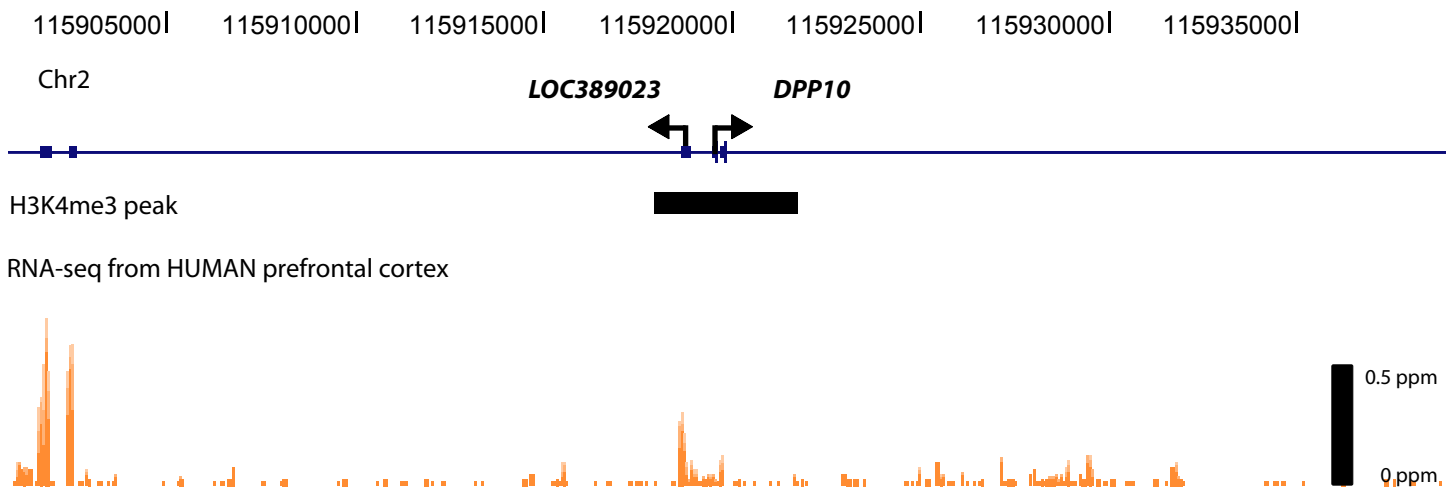

MACAQUE 10x lifted-over around H3K4me3 peak

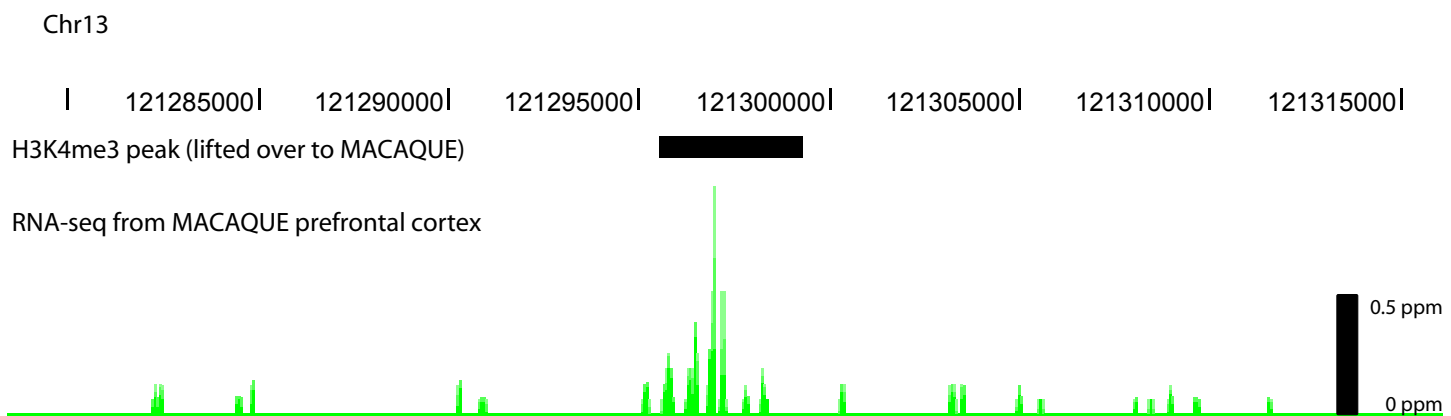

CHIMPANZEE 10x lifted-over around H3K4me3 peak

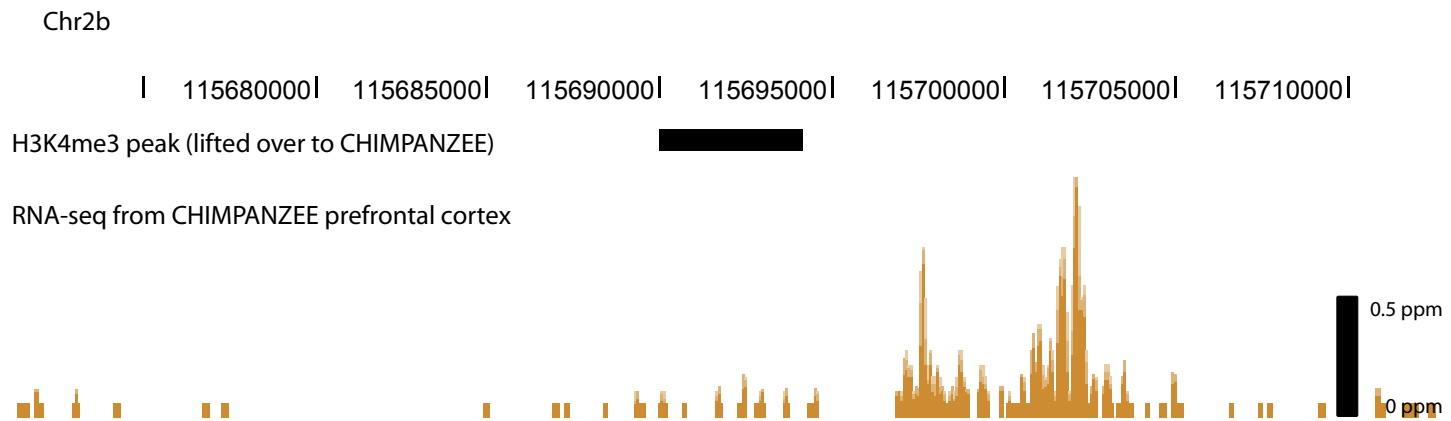

HUMAN 10x around H3K4me3 peak

132790000|

132795000|

132800000|

Chr2

H3K4me3 peak

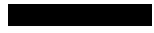

RNA-seq from HUMAN prefrontal cortex

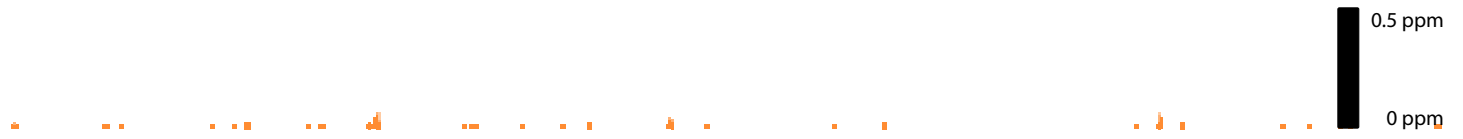

MACAQUE 10x lifted-over around H3K4me3 peak

H3K4me3 peak (lifted over to MACAQUE)

RNA-seq from MACAQUE prefrontal cortex

CHIMPANZEE 10x lifted-over around H3K4me3 peak

H3K4me3 peak (lifted over to CHIMPANZEE)

RNA-seq from CHIMPANZEE prefrontal cortex

HUMAN 10x around H3K4me3 peak

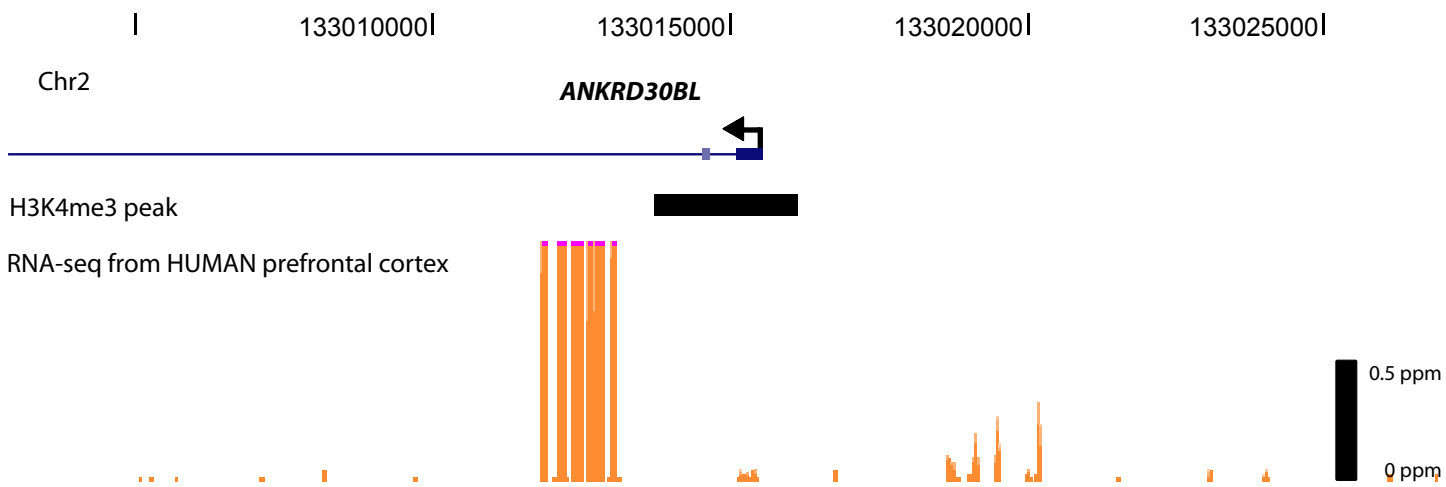

MACAQUE 10x lifted-over around H3K4me3 peak

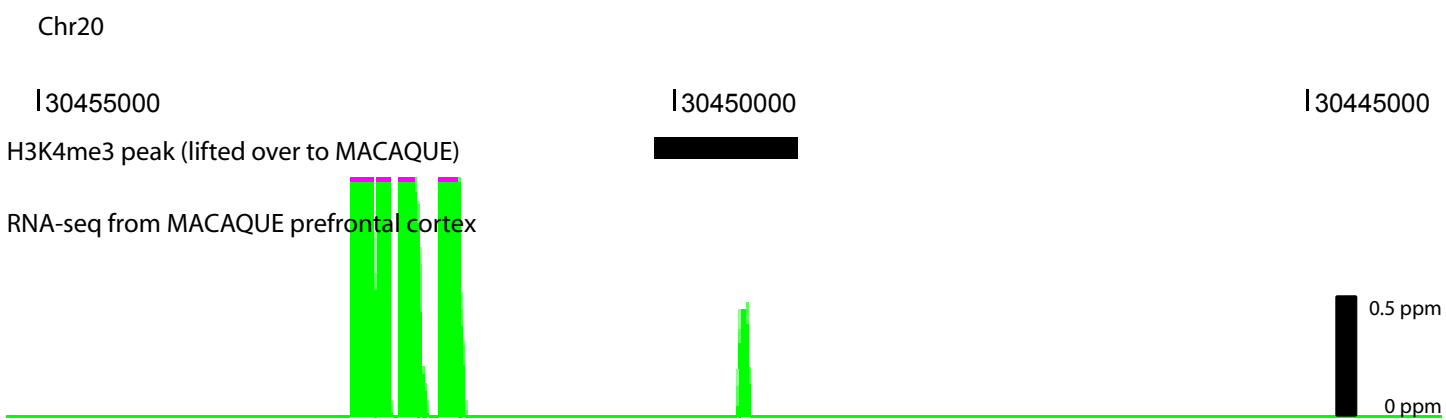

CHIMPANZEE 10x lifted-over around H3K4me3 peak

H3K4me3 peak (lifted over to CHIMPANZEE)

RNA-seq from CHIMPANZEE prefrontal cortex

HUMAN 10x around H3K4me3 peak

220000| 225000| 230000| 235000| 240000| 245000| 250000| 255000| 260000|

Chr3

*CHL1*

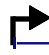

H3K4me3 peak

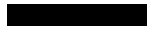

RNA-seq from HUMAN prefrontal cortex

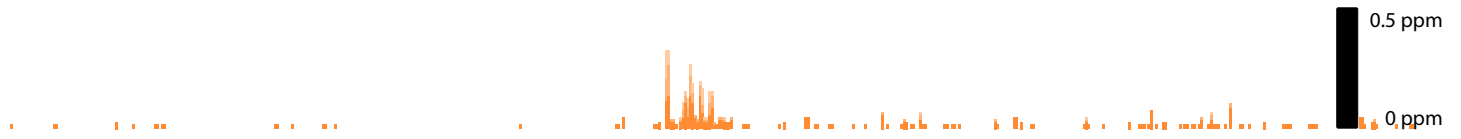

MACAQUE 10x lifted-over around H3K4me3 peak

Chr2

160860000 | 160855000 | 160850000 | 160845000 | 160840000 | 160835000 | 160830000 | 160825000 | 160820000 |

H3K4me3 peak (lifted over to MACAQUE)

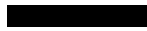

RNA-seq from MACAQUE prefrontal cortex

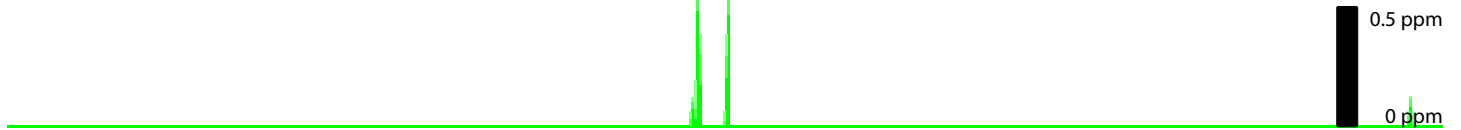

CHIMPANZEE 10x lifted-over around H3K4me3 peak

Chr3

230000| 235000| 240000| 245000| 250000| 255000| 260000| 265000| 270000| 275000| 280000|

H3K4me3 peak (lifted over to CHIMPANZEE)

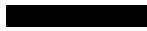

RNA-seq from CHIMPANZEE prefrontal cortex

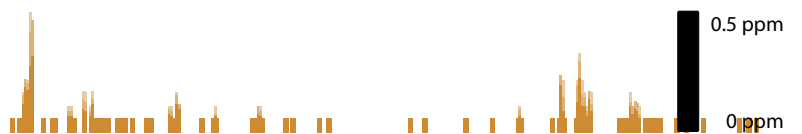



HUMAN 10x around H3K4me3 peak

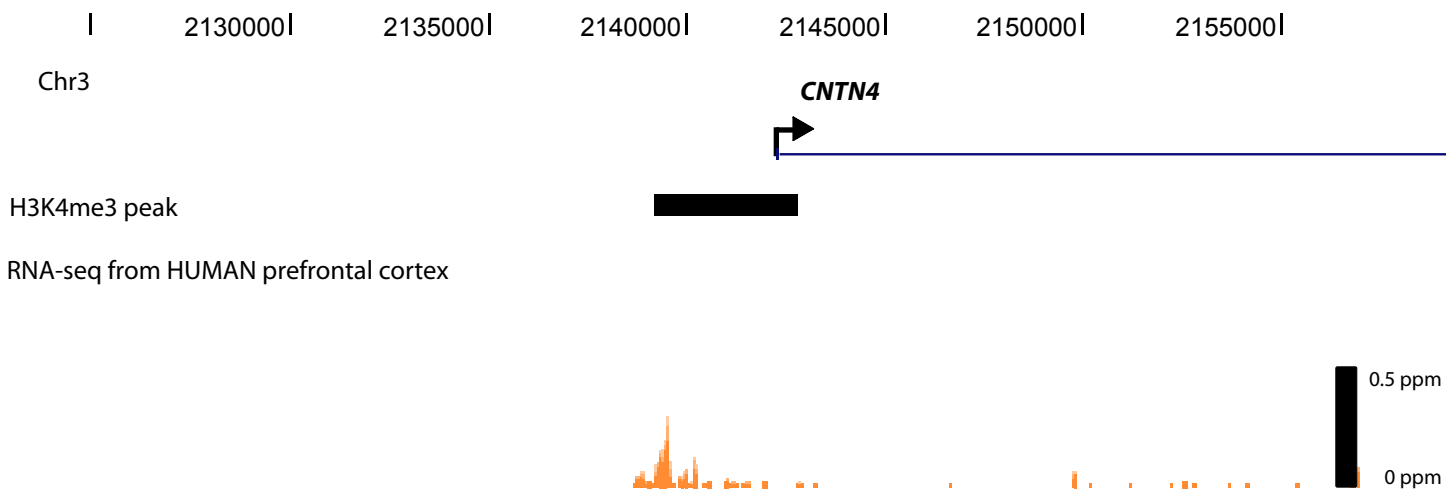

MACAQUE 10x lifted-over around H3K4me3 peak

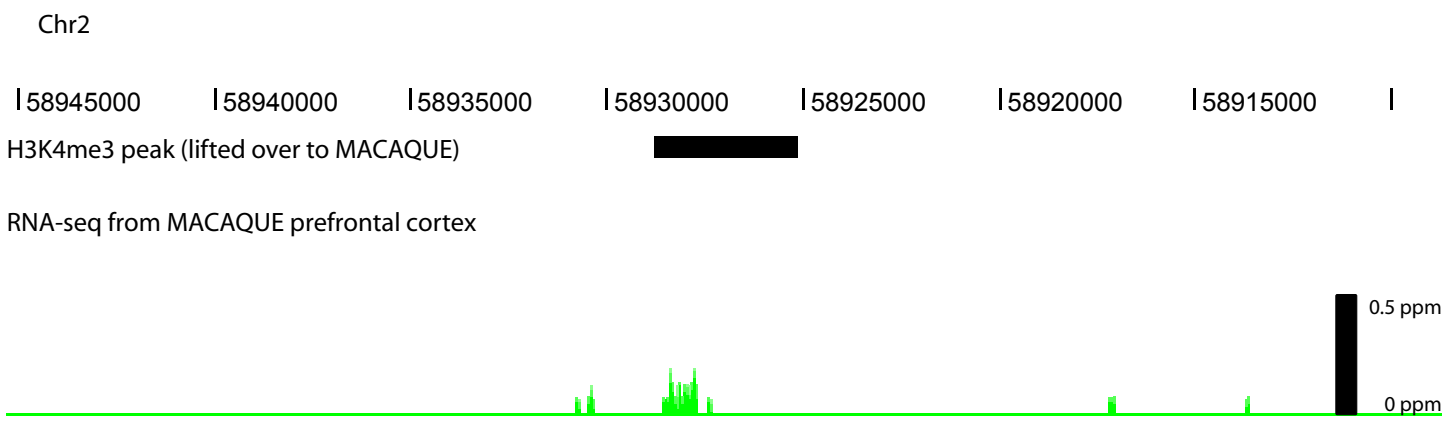

CHIMPANZEE 10x lifted-over around H3K4me3 peak

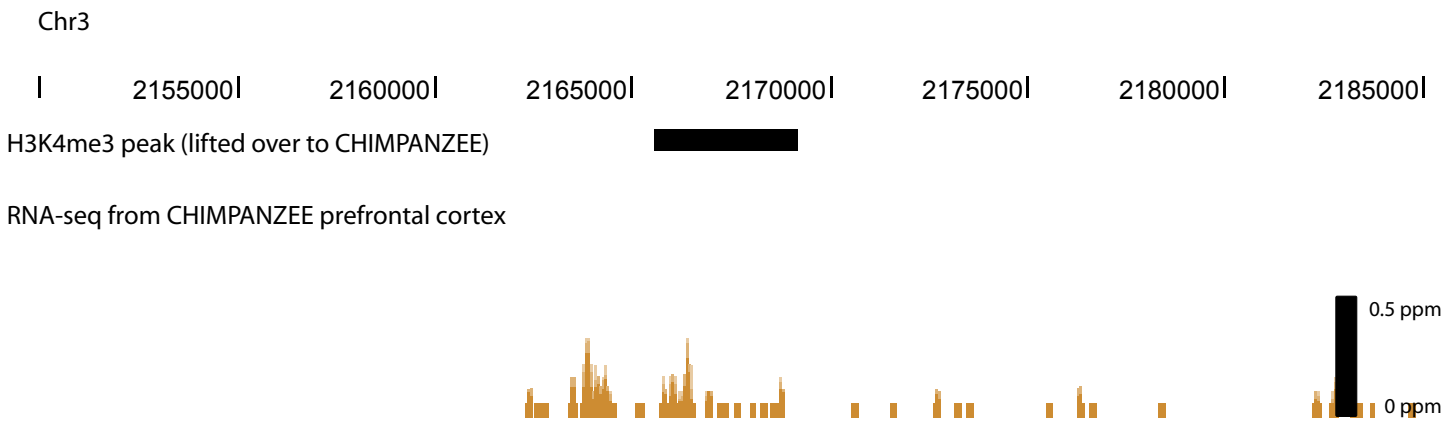

HUMAN 10x around H3K4me3 peak

87135000|

87140000|

87145000|

Chr3

H3K4me3 peak

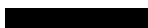

RNA-seq from HUMAN prefrontal cortex

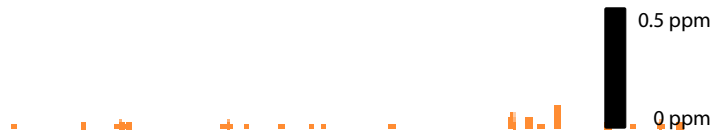

MACAQUE 10x lifted-over around H3K4me3 peak

Chr2

11330000|

11335000|

11340000|

11345000|

H3K4me3 peak (lifted over to MACAQUE)

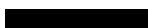

RNA-seq from MACAQUE prefrontal cortex

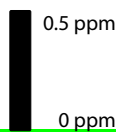

CHIMPANZEE 10x lifted-over around H3K4me3 peak

Chr3

89380000|

89385000|

89390000|

H3K4me3 peak (lifted over to CHIMPANZEE)



RNA-seq from CHIMPANZEE prefrontal cortex

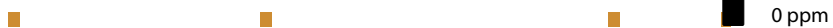

HUMAN 10x around H3K4me3 peak

146760000|

146765000|

Chr5

**STK32A**

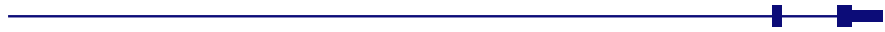

H3K4me3 peak

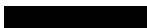

RNA-seq from HUMAN prefrontal cortex

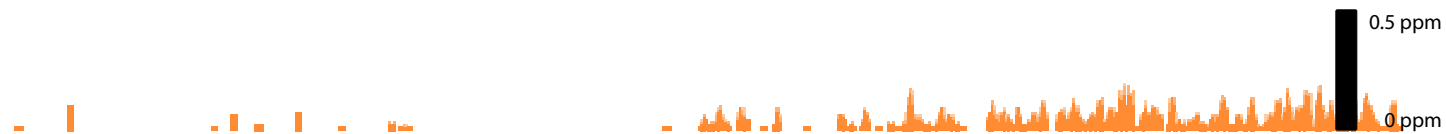

MACAQUE 10x lifted-over around H3K4me3 peak

Chr6

143840000|

143845000|

H3K4me3 peak (lifted over to MACAQUE)

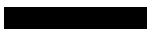

RNA-seq from MACAQUE prefrontal cortex

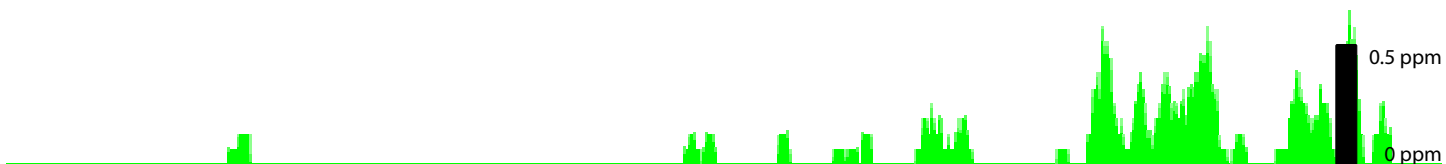

CHIMPANZEE 10x lifted-over around H3K4me3 peak

Chr5

149310000|

149315000|

H3K4me3 peak (lifted over to CHIMPANZEE)

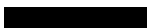

RNA-seq from CHIMPANZEE prefrontal cortex

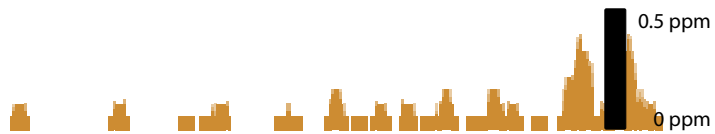

HUMAN 10x around H3K4me3 peak

151810000|

151815000|

151820000|

Chr6

*C6orf97*

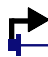

H3K4me3 peak

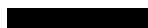

RNA-seq from HUMAN prefrontal cortex

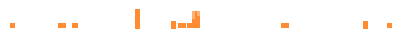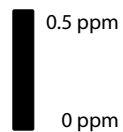

MACAQUE 10x lifted-over around H3K4me3 peak

Chr4

| 111595000

| 111590000

| 111585000

|

H3K4me3 peak (lifted over to MACAQUE)

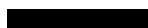

RNA-seq from MACAQUE prefrontal cortex

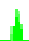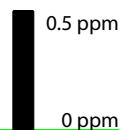

CHIMPANZEE 10x lifted-over around H3K4me3 peak

Chr6

154255000|

154260000|

154265000|

154270000|

H3K4me3 peak (lifted over to CHIMPANZEE)



RNA-seq from CHIMPANZEE prefrontal cortex

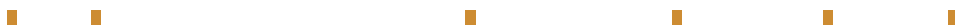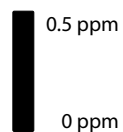

HUMAN 10x around H3K4me3 peak

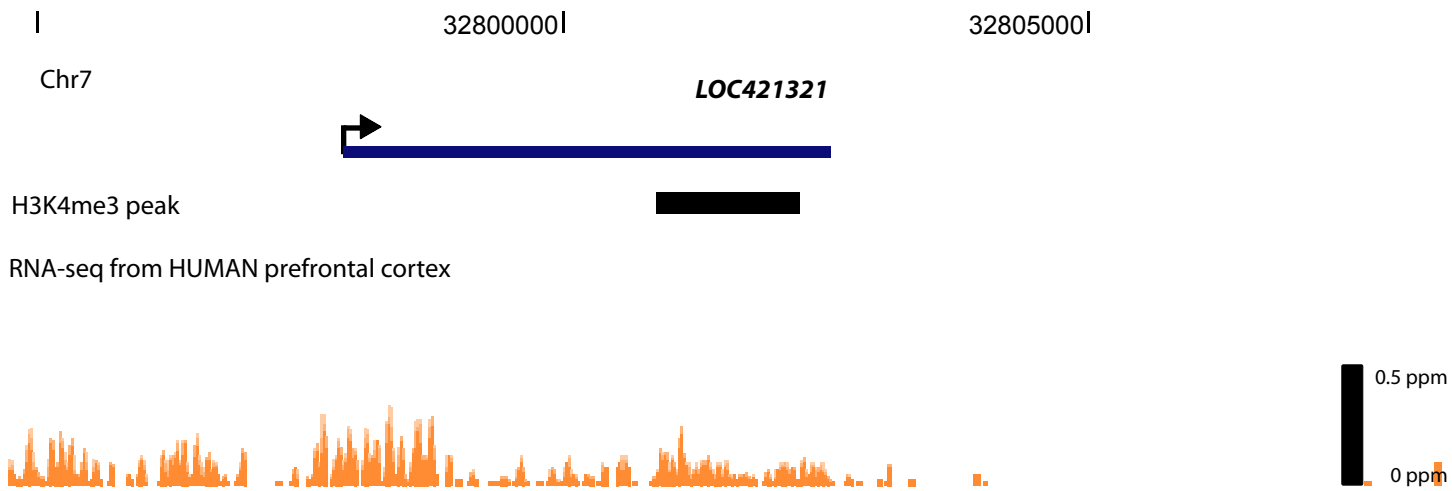

MACAQUE 10x lifted-over around H3K4me3 peak

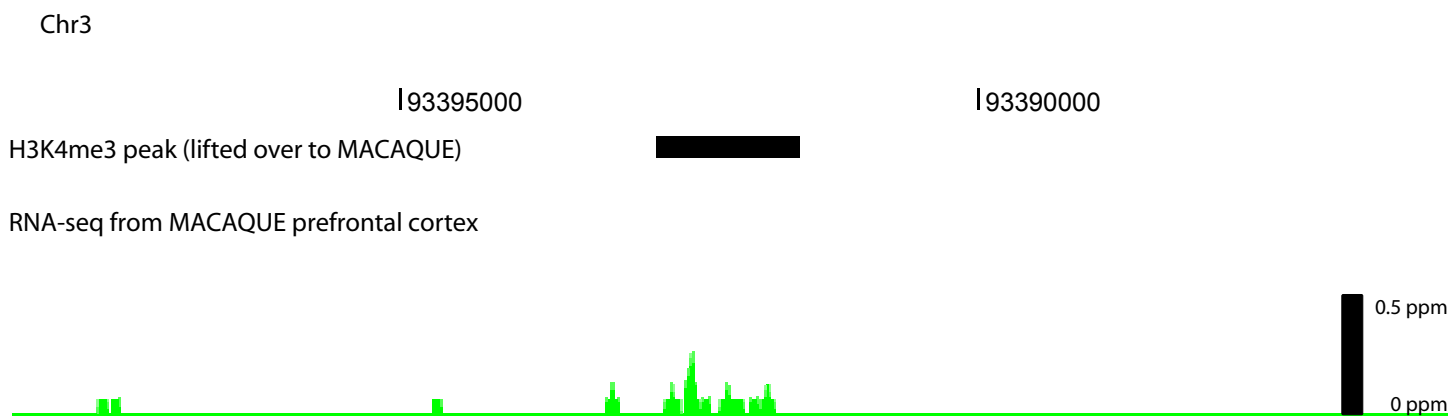

CHIMPANZEE 10x lifted-over around H3K4me3 peak

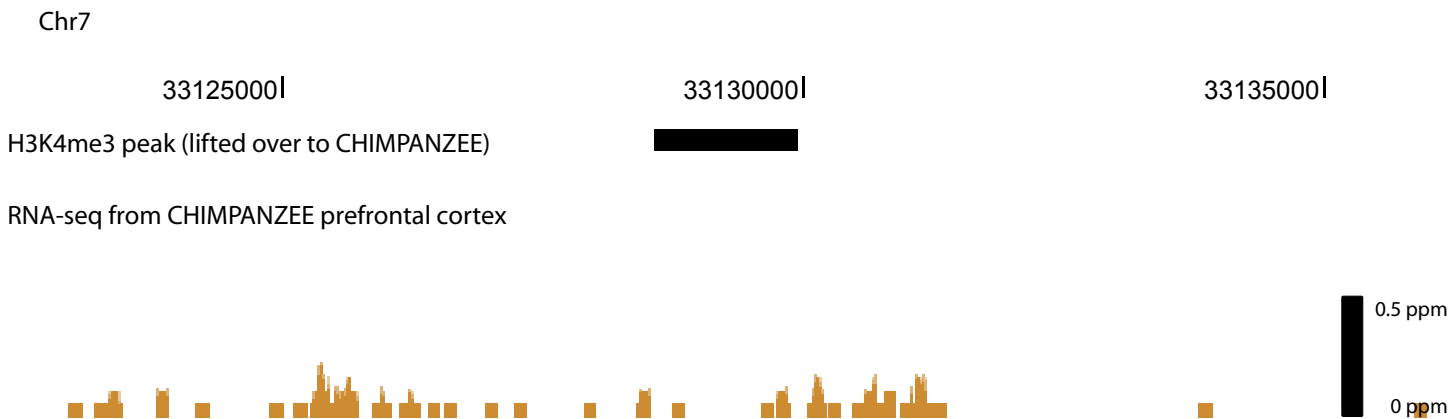

HUMAN 10x around H3K4me3 peak

51535000|

51540000|

51545000|

Chr7

H3K4me3 peak



RNA-seq from HUMAN prefrontal cortex

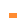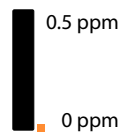

MACAQUE 10x lifted-over around H3K4me3 peak

Chr3

|74955000

|74950000

|

H3K4me3 peak (lifted over to MACAQUE)



RNA-seq from MACAQUE prefrontal cortex

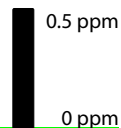

CHIMPANZEE 10x lifted-over around H3K4me3 peak

Chr7

52415000|

52420000|

52425000|

H3K4me3 peak (lifted over to CHIMPANZEE)

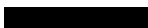

RNA-seq from CHIMPANZEE prefrontal cortex

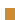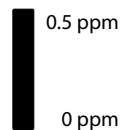

HUMAN 10x around H3K4me3 peak

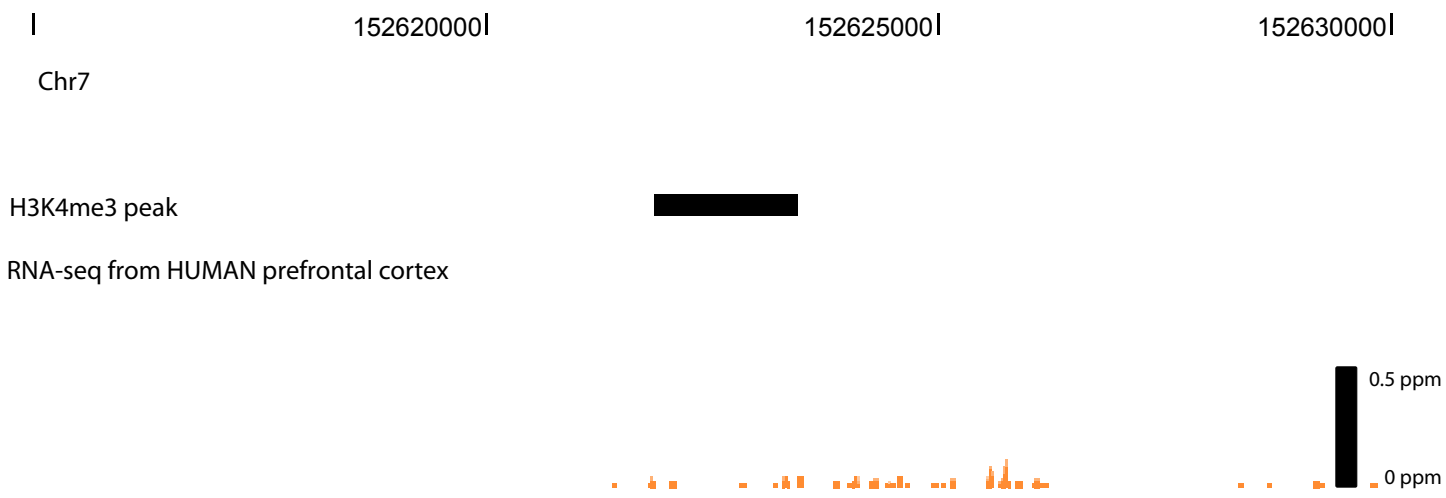

MACAQUE 10x lifted-over around H3K4me3 peak

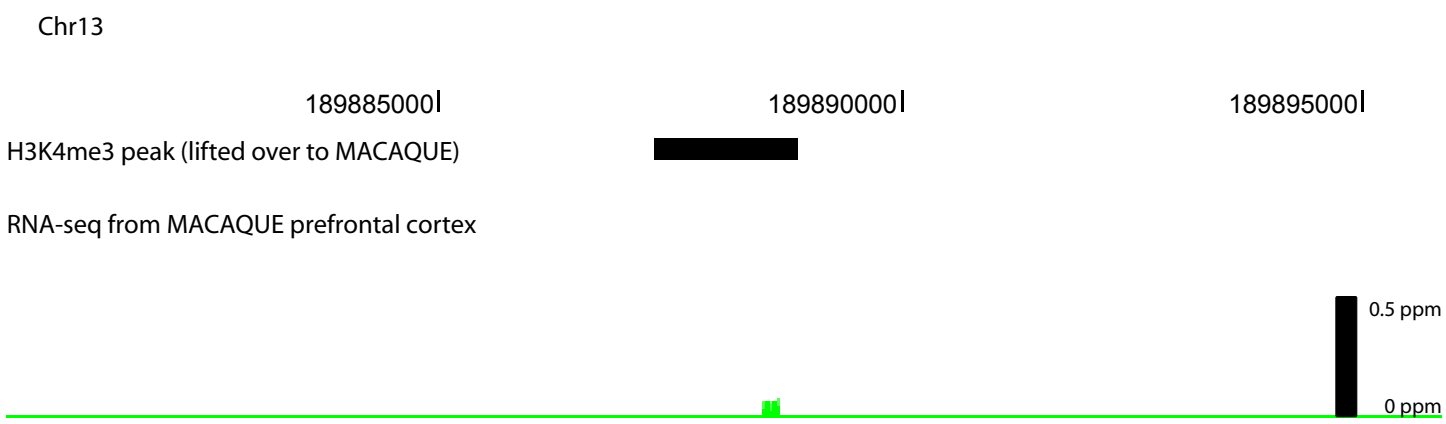

CHIMPANZEE 10x lifted-over around H3K4me3 peak

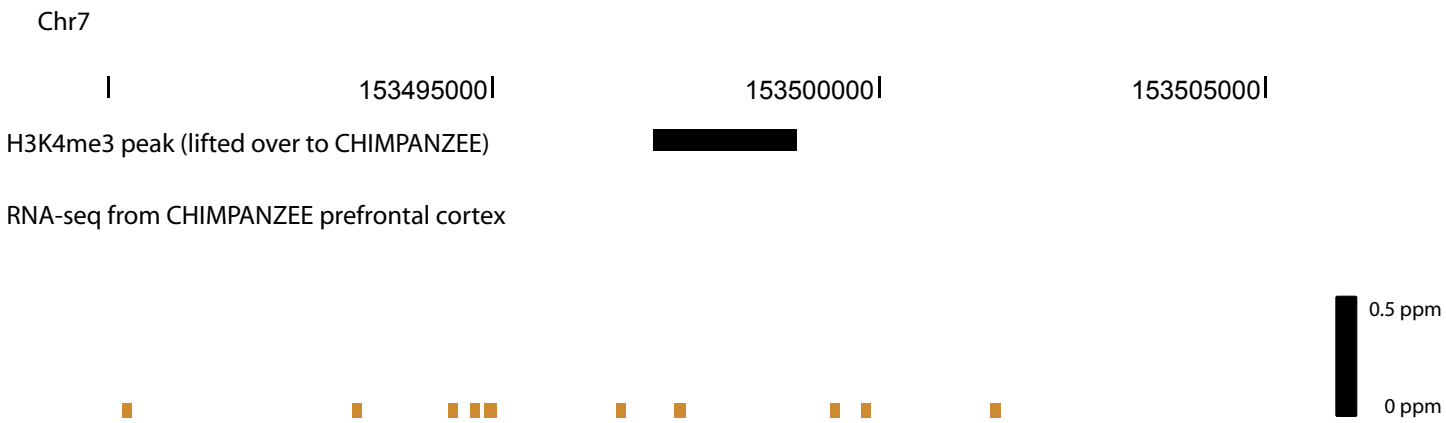

HUMAN 10x around H3K4me3 peak

826000| 827000| 828000| 829000| 830000| 831000| 832000| 833000| 834000| 835000| 836000|

Chr10

H3K4me3 peak



RNA-seq from HUMAN prefrontal cortex

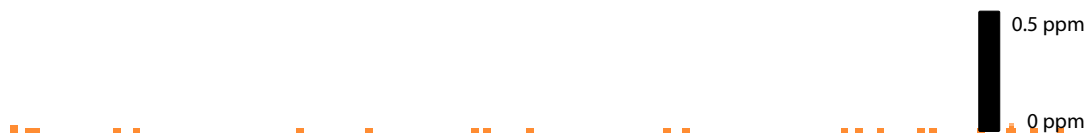

MACAQUE 10x lifted-over around H3K4me3 peak

Chr9

| 963000| 963500| 964000| 964500| 965000| 965500|

H3K4me3 peak (lifted over to MACAQUE)



RNA-seq from MACAQUE prefrontal cortex

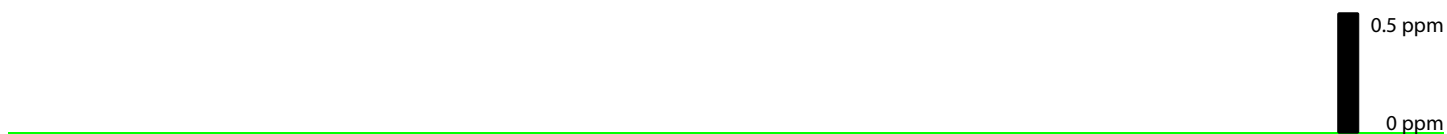

CHIMPANZEE 10x lifted-over around H3K4me3 peak

Chr10

878000| 879000| 880000| 881000| 882000| 883000| 884000| 885000| 886000| 887000|

H3K4me3 peak (lifted over to CHIMPANZEE)

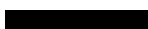

RNA-seq from CHIMPANZEE prefrontal cortex

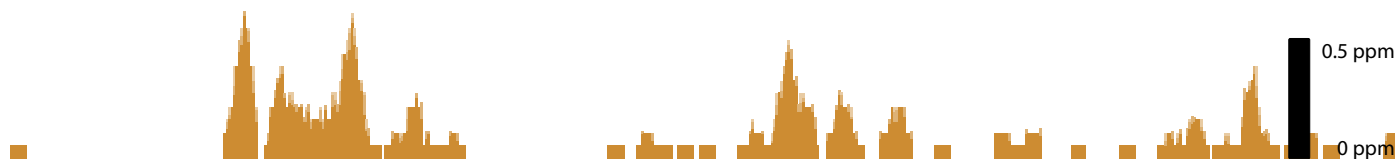



HUMAN 10x around H3K4me3 peak

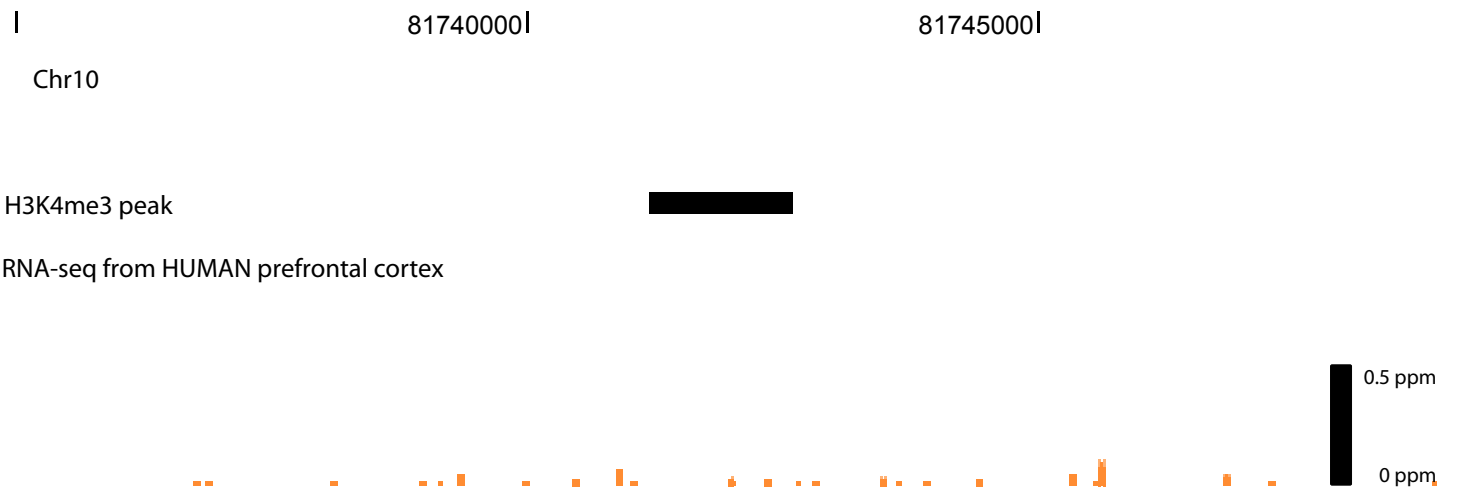

MACAQUE 10x lifted-over around H3K4me3 peak

H3K4me3 peak (lifted over to MACAQUE)

RNA-seq from MACAQUE prefrontal cortex

CHIMPANZEE 10x lifted-over around H3K4me3 peak

H3K4me3 peak (lifted over to CHIMPANZEE)

RNA-seq from CHIMPANZEE prefrontal cortex

HUMAN 10x around H3K4me3 peak

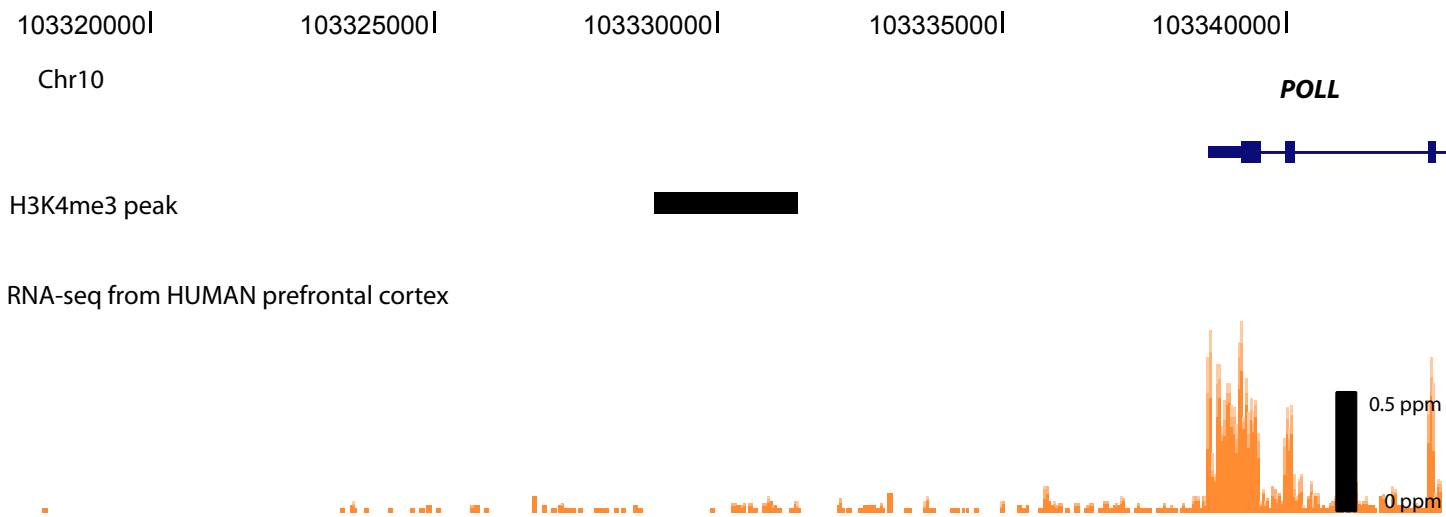

MACAQUE 10x lifted-over around H3K4me3 peak

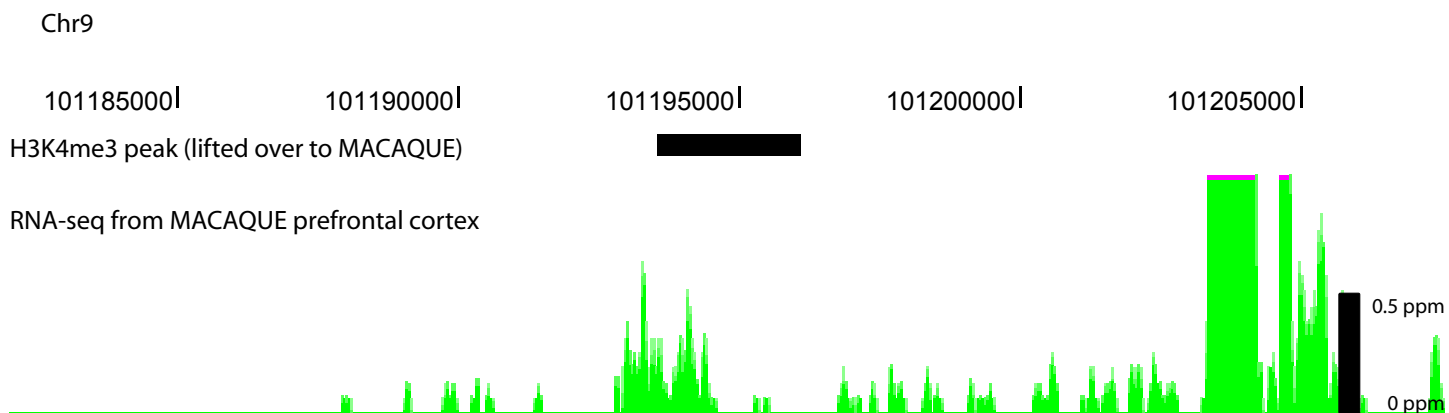

CHIMPANZEE 10x lifted-over around H3K4me3 peak

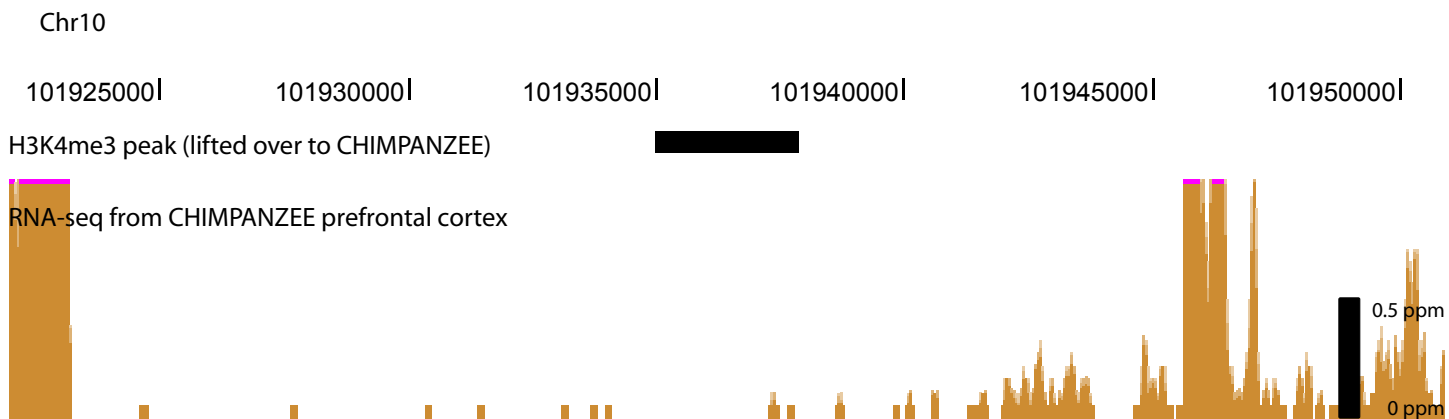

HUMAN 10x around H3K4me3 peak

109665000|

109670000|

109675000|

109680000|

109685000|

Chr10

H3K4me3 peak

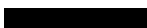

RNA-seq from HUMAN prefrontal cortex

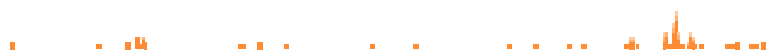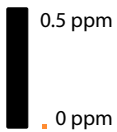

MACAQUE 10x lifted-over around H3K4me3 peak

Chr9

|

107635000|

107640000|

107645000|

107650000|

H3K4me3 peak (lifted over to MACAQUE)

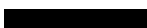

RNA-seq from MACAQUE prefrontal cortex

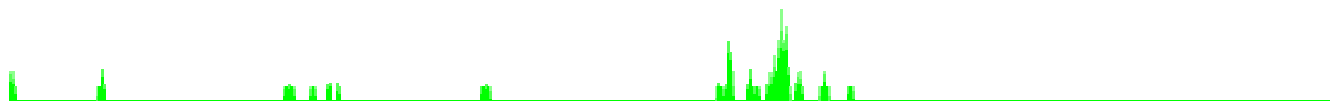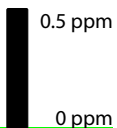

CHIMPANZEE 10x lifted-over around H3K4me3 peak

Chr10

|

108470000|

108475000|

108480000|

108485000|

H3K4me3 peak (lifted over to CHIMPANZEE)

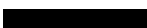

RNA-seq from CHIMPANZEE prefrontal cortex

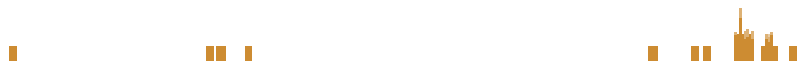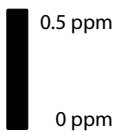

HUMAN 10x around H3K4me3 peak

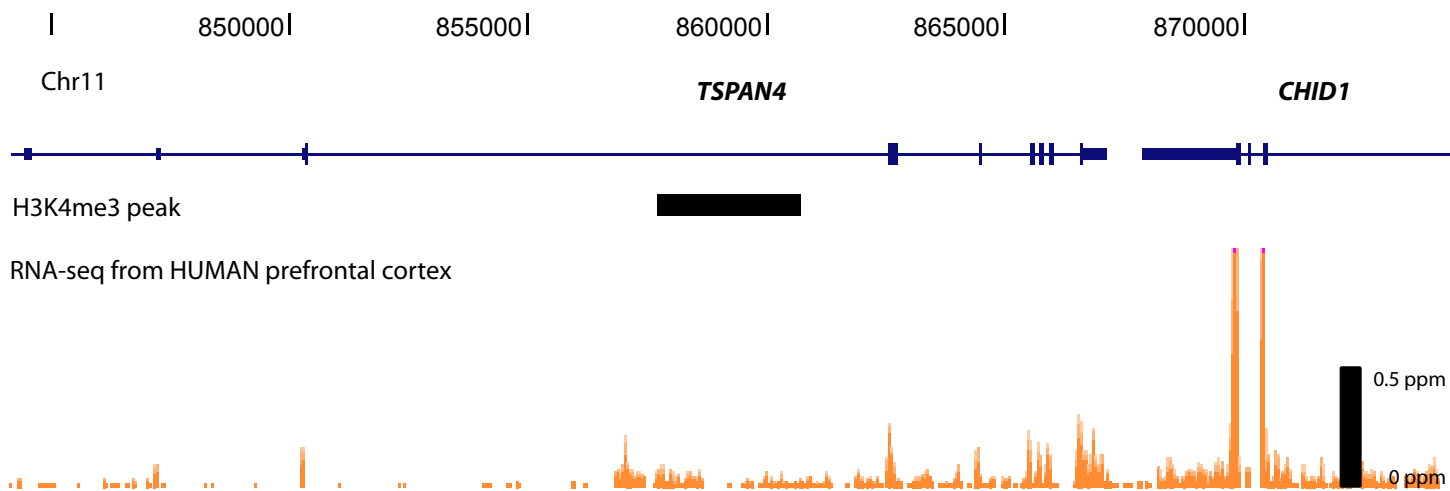

MACAQUE 10x lifted-over around H3K4me3 peak

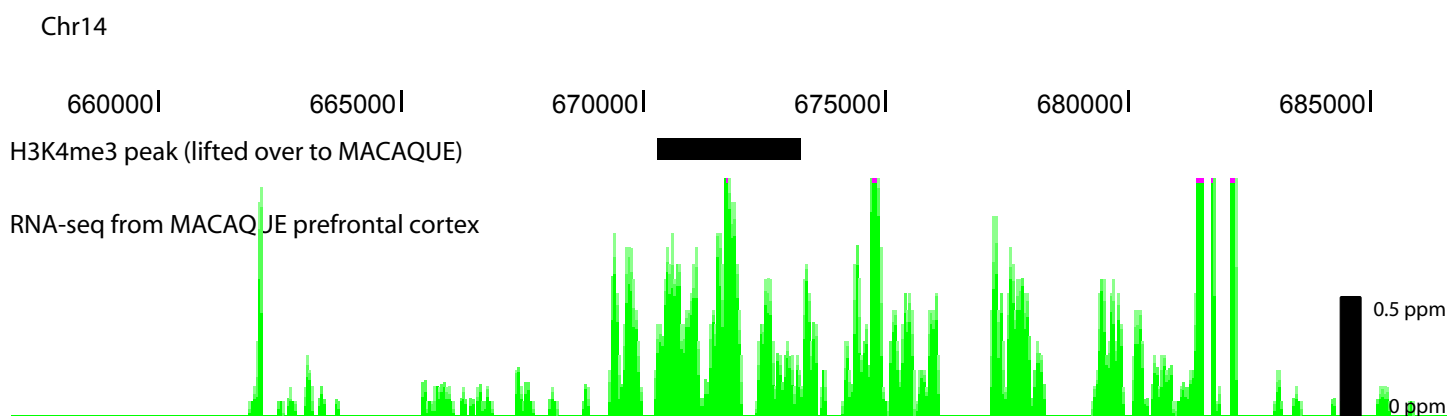

CHIMPANZEE 10x lifted-over around H3K4me3 peak

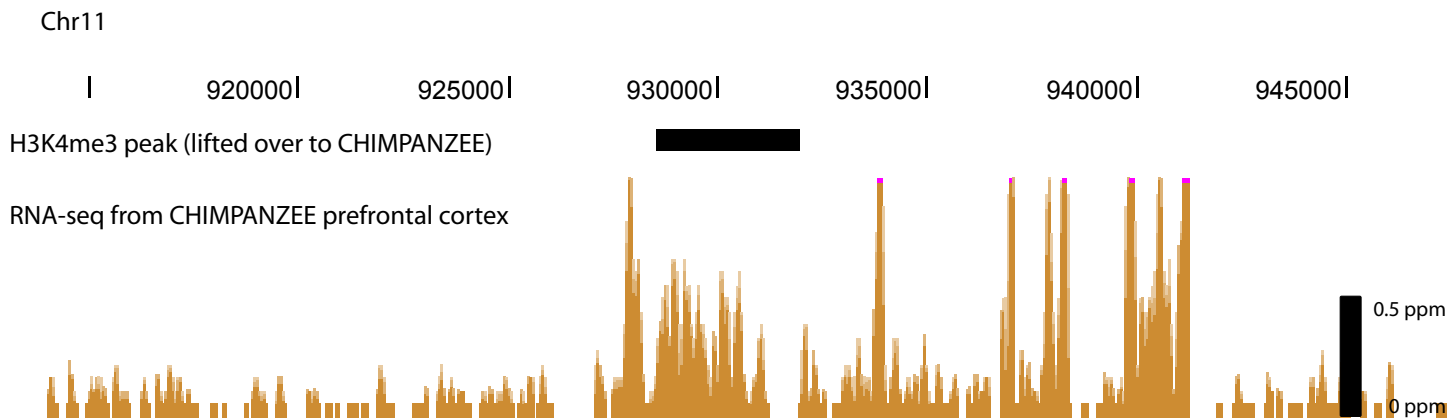

HUMAN 10x around H3K4me3 peak

31615000| 31620000| 31625000| 31630000| 31635000| 31640000| 31645000| 31650000|  
Chr13

H3K4me3 peak



RNA-seq from HUMAN prefrontal cortex

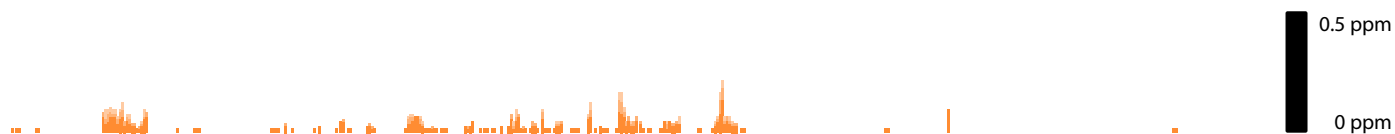

MACAQUE 10x lifted-over around H3K4me3 peak

Chr17

10460000| 10465000| 10470000| 10475000| 10480000| 10485000|

H3K4me3 peak (lifted over to MACAQUE)



RNA-seq from MACAQUE prefrontal cortex

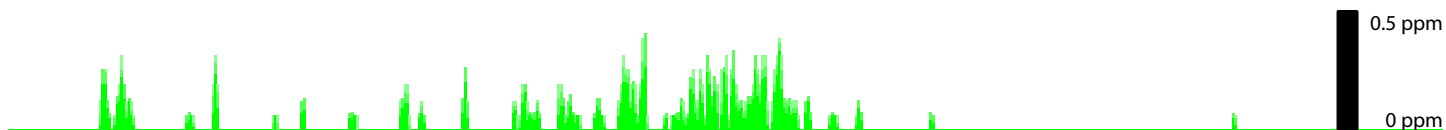

CHIMPANZEE 10x lifted-over around H3K4me3 peak

Chr13

30775000| 30780000| 30785000| 30790000| 30795000| 30800000|

H3K4me3 peak (lifted over to CHIMPANZEE)

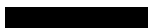

RNA-seq from CHIMPANZEE prefrontal cortex

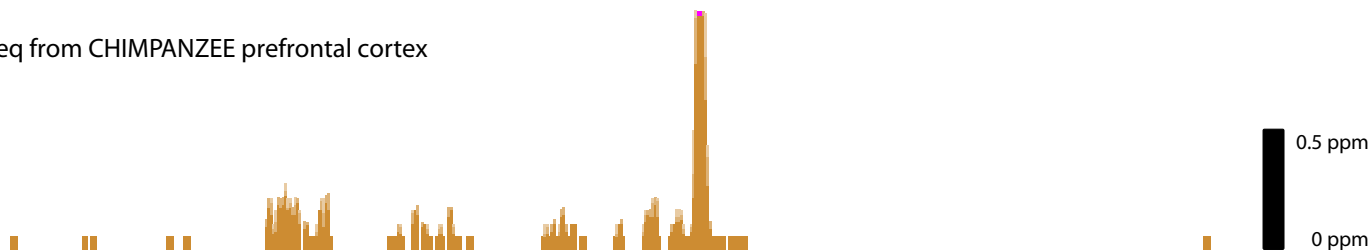

HUMAN 10x around H3K4me3 peak

98193000| 98194000| 98195000| 98196000| 98197000| 98198000| 98199000| 98200000|  
Chr15

H3K4me3 peak

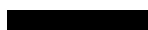

RNA-seq from HUMAN prefrontal cortex

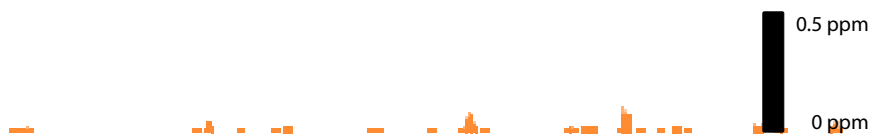

MACAQUE 10x lifted-over around H3K4me3 peak

Chr7

77611000| 77612000| 77613000| 77614000| 77615000| 77616000|

H3K4me3 peak (lifted over to MACAQUE)

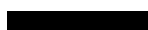

RNA-seq from MACAQUE prefrontal cortex

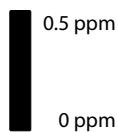

CHIMPANZEE 10x lifted-over around H3K4me3 peak

Chr15

95584000| 95585000| 95586000| 95587000| 95588000| 95589000| 95590000|

H3K4me3 peak (lifted over to CHIMPANZEE)



RNA-seq from CHIMPANZEE prefrontal cortex

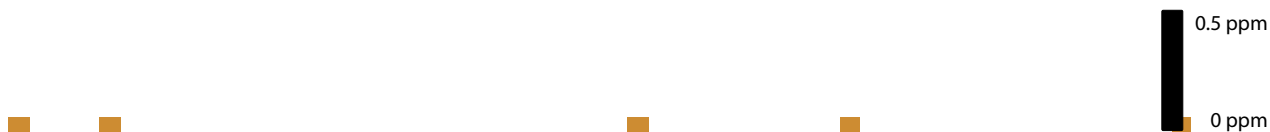

HUMAN 10x around H3K4me3 peak

21470000|

21475000|

21480000|

21485000|

Chr17

H3K4me3 peak

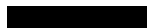

RNA-seq from HUMAN prefrontal cortex

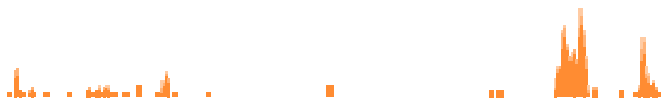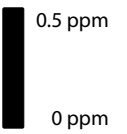

MACAQUE 10x lifted-over around H3K4me3 peak

Chr16

20735000|

20740000|

20745000|

H3K4me3 peak (lifted over to MACAQUE)

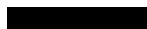

RNA-seq from MACAQUE prefrontal cortex

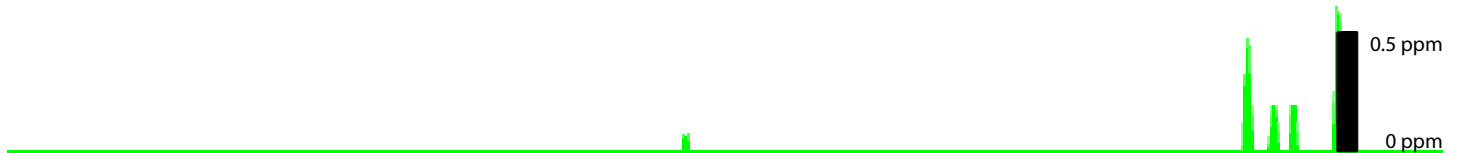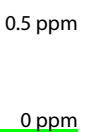

CHIMPANZEE 10x lifted-over around H3K4me3 peak

Chr17

| 34690000

| 34685000

| 34680000

|

H3K4me3 peak (lifted over to CHIMPANZEE)

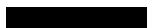

RNA-seq from CHIMPANZEE prefrontal cortex

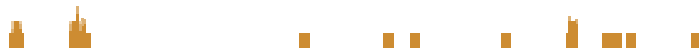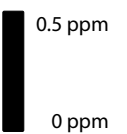

HUMAN 10x around H3K4me3 peak

| 880000| 885000| 890000| 895000| 900000| 905000| 910000| 915000| 920000| 925000| 930000| 935000|

Chr18

*ADCYAP1*

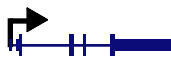

H3K4me3 peak

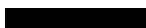

RNA-seq from HUMAN prefrontal cortex

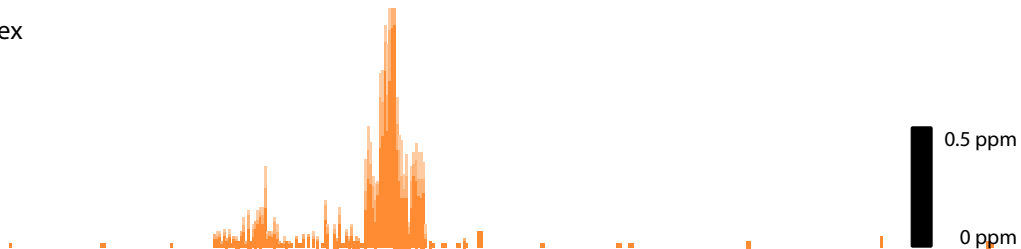

MACAQUE 10x lifted-over around H3K4me3 peak

Chr18

13170000| 13180000| 13190000| 13200000| 13210000| 13220000|

H3K4me3 peak (lifted over to MACAQUE)

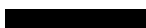

RNA-seq from MACAQUE prefrontal cortex

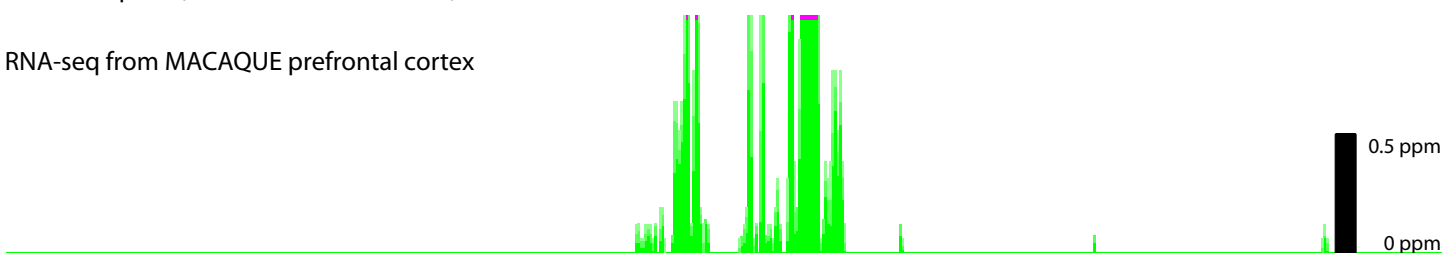

CHIMPANZEE 10x lifted-over around H3K4me3 peak

Chr18

| 15920000 | 15910000 | 15900000 | 15890000 | 15880000 | 15870000 | 15860000

H3K4me3 peak (lifted over to CHIMPANZEE)

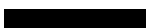

RNA-seq from CHIMPANZEE prefrontal cortex

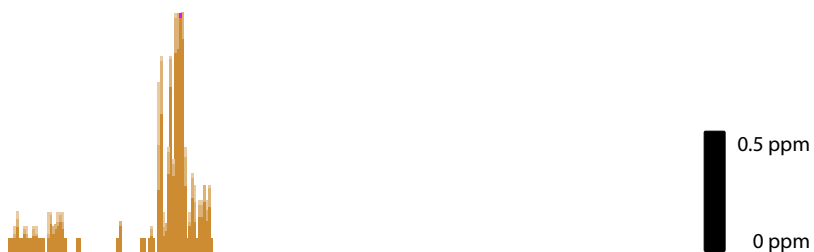



HUMAN 10x around H3K4me3 peak

73625000|

73630000|

Chr18

H3K4me3 peak



RNA-seq from HUMAN prefrontal cortex

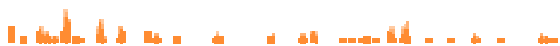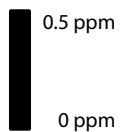

MACAQUE 10x lifted-over around H3K4me3 peak

Chr18

69375000|

69380000|

69385000|

H3K4me3 peak (lifted over to MACAQUE)



RNA-seq from MACAQUE prefrontal cortex

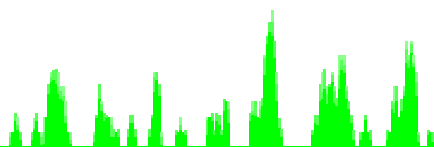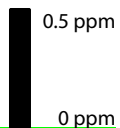

CHIMPANZEE 10x lifted-over around H3K4me3 peak

Chr18

72805000|

72810000|

72815000|

H3K4me3 peak (lifted over to CHIMPANZEE)

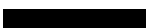

RNA-seq from CHIMPANZEE prefrontal cortex

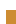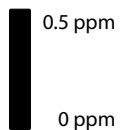

HUMAN 10x around H3K4me3 peak

74795000|

74800000|

74805000|

Chr18

*MBP*

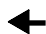

H3K4me3 peak



RNA-seq from HUMAN prefrontal cortex

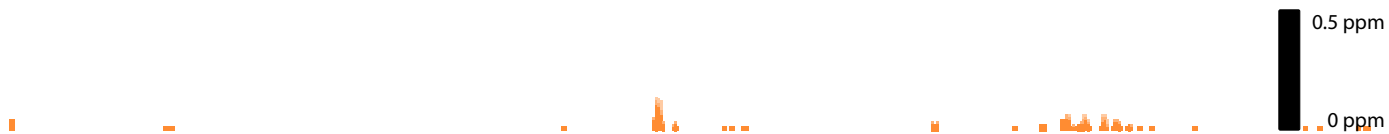

MACAQUE 10x lifted-over around H3K4me3 peak

Chr18

|70550000

|70545000

|70540000

|70535000

H3K4me3 peak (lifted over to MACAQUE)



RNA-seq from MACAQUE prefrontal cortex

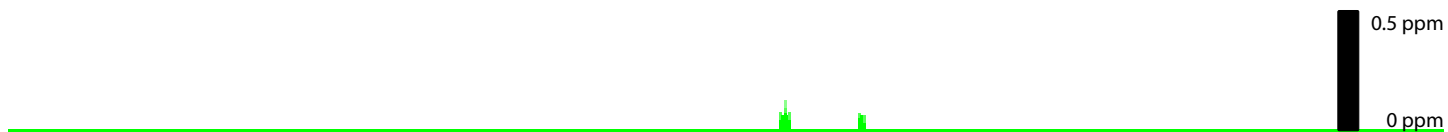

CHIMPANZEE 10x lifted-over around H3K4me3 peak

Chr18

74010000|

74015000|

74020000|

H3K4me3 peak (lifted over to CHIMPANZEE)

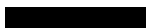

RNA-seq from CHIMPANZEE prefrontal cortex

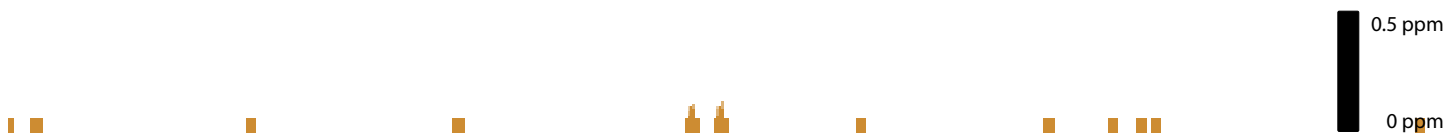

HUMAN 10x around H3K4me3 peak

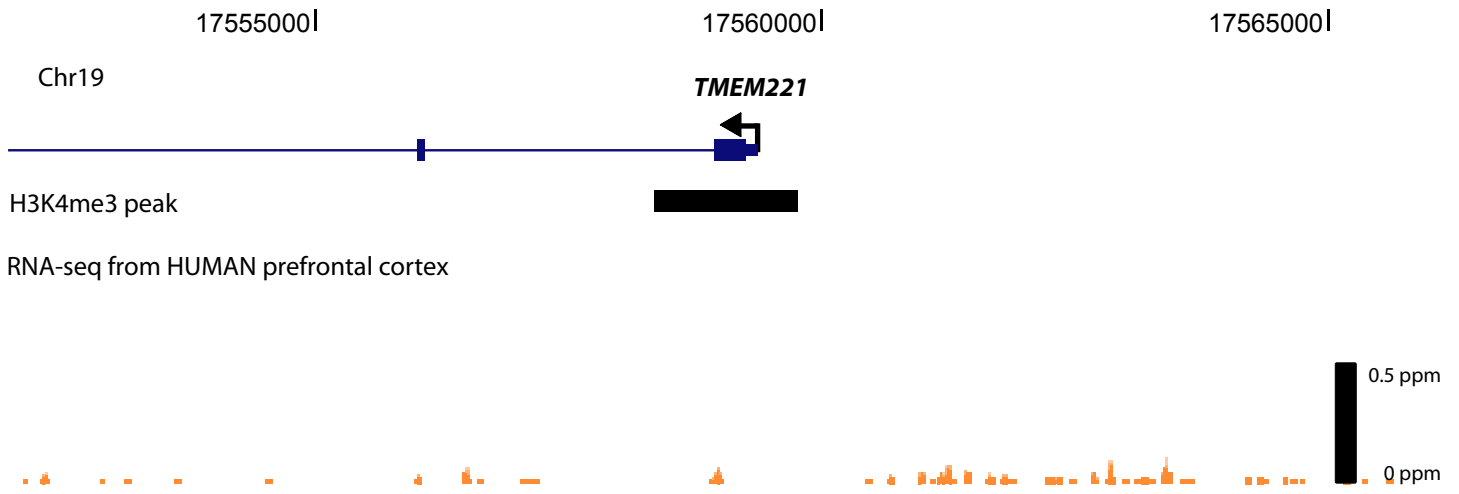

MACAQUE 10x lifted-over around H3K4me3 peak

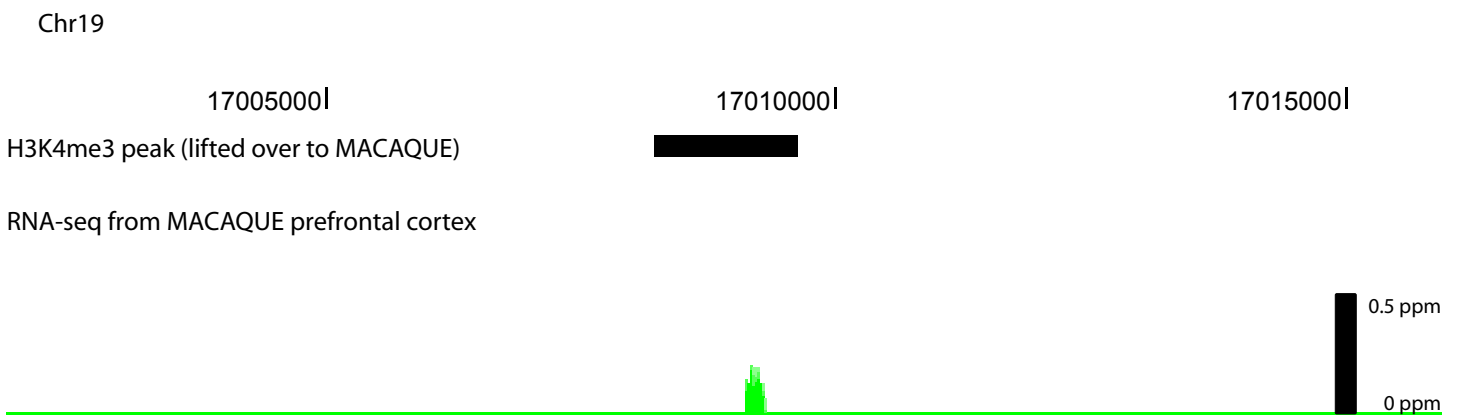

CHIMPANZEE 10x lifted-over around H3K4me3 peak

H3K4me3 peak (lifted over to CHIMPANZEE)

RNA-seq from CHIMPANZEE prefrontal cortex

HUMAN 10x around H3K4me3 peak

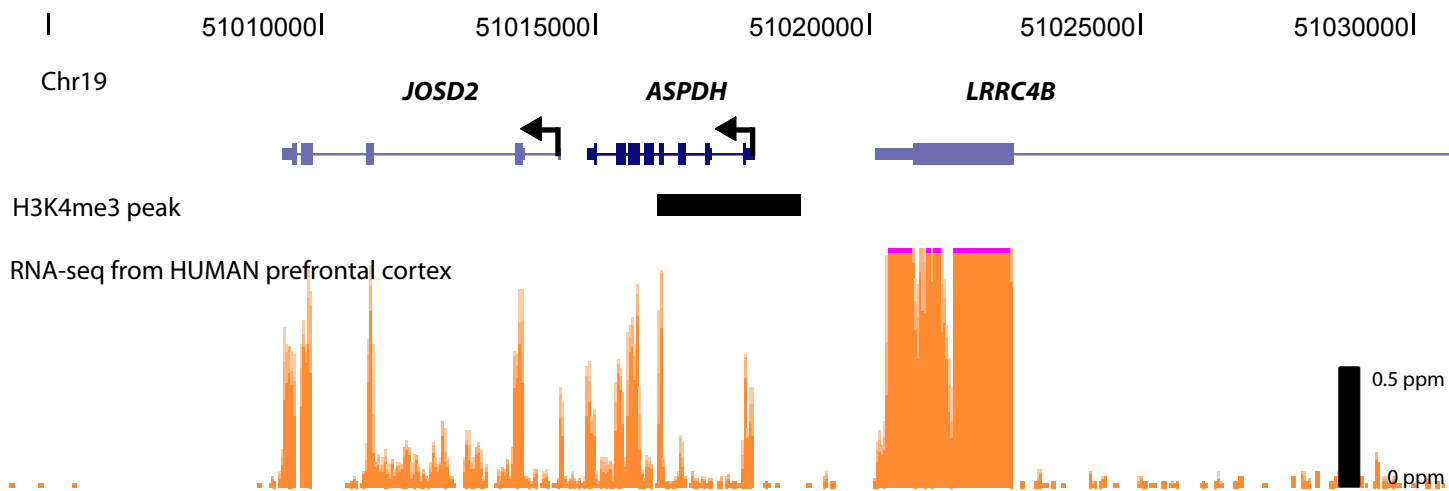

MACAQUE 10x lifted-over around H3K4me3 peak

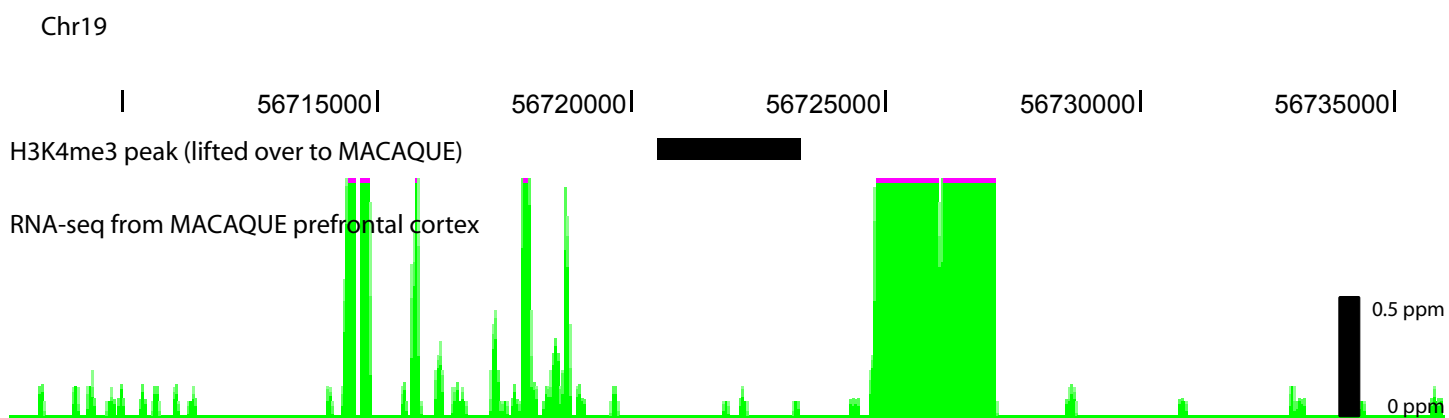

CHIMPANZEE 10x lifted-over around H3K4me3 peak

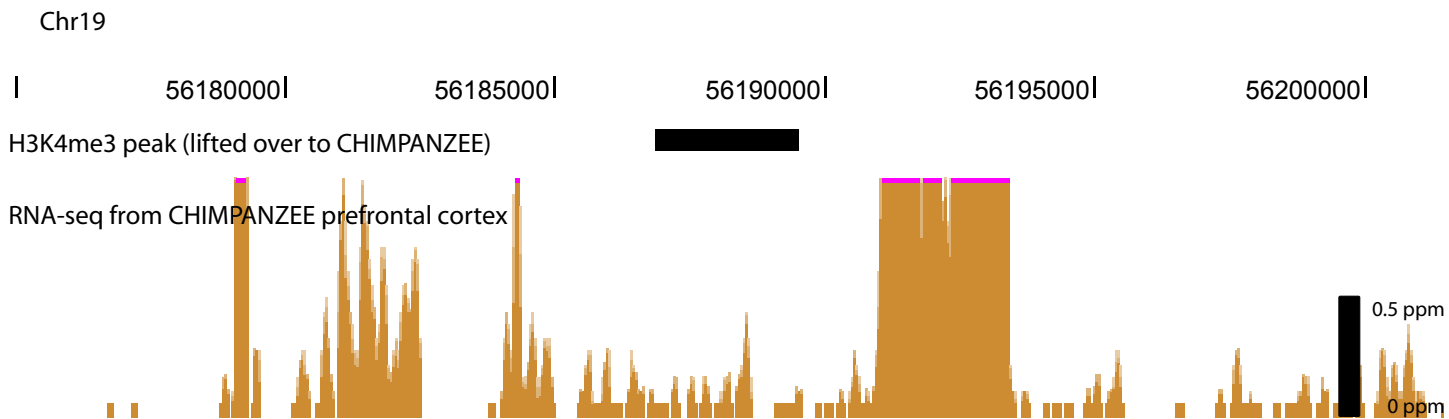

HUMAN 10x around H3K4me3 peak

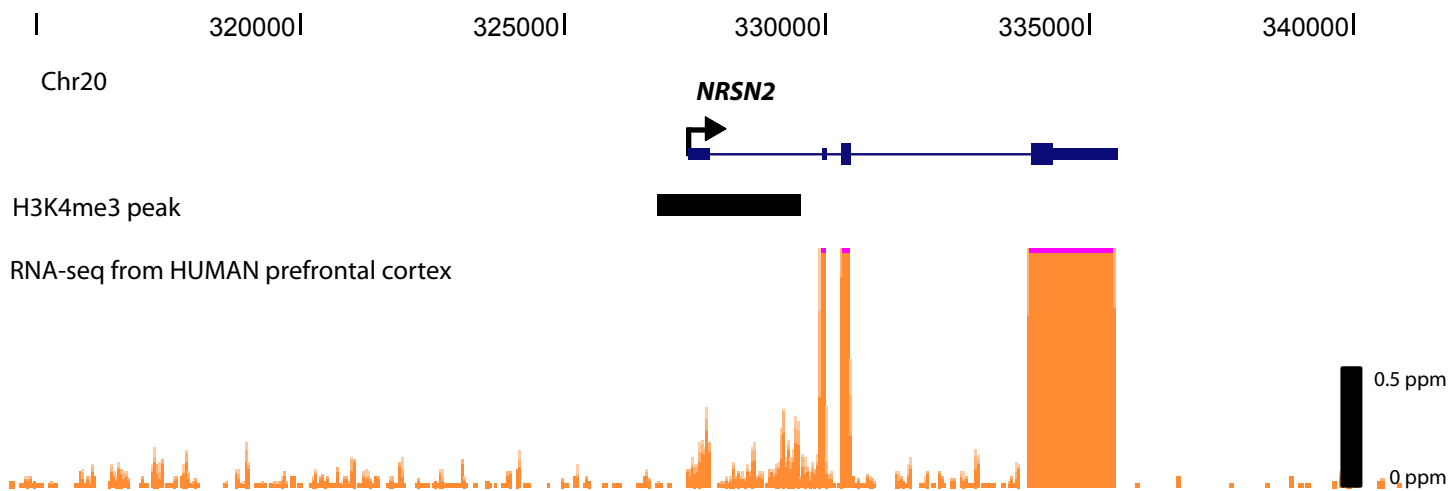

MACAQUE 10x lifted-over around H3K4me3 peak

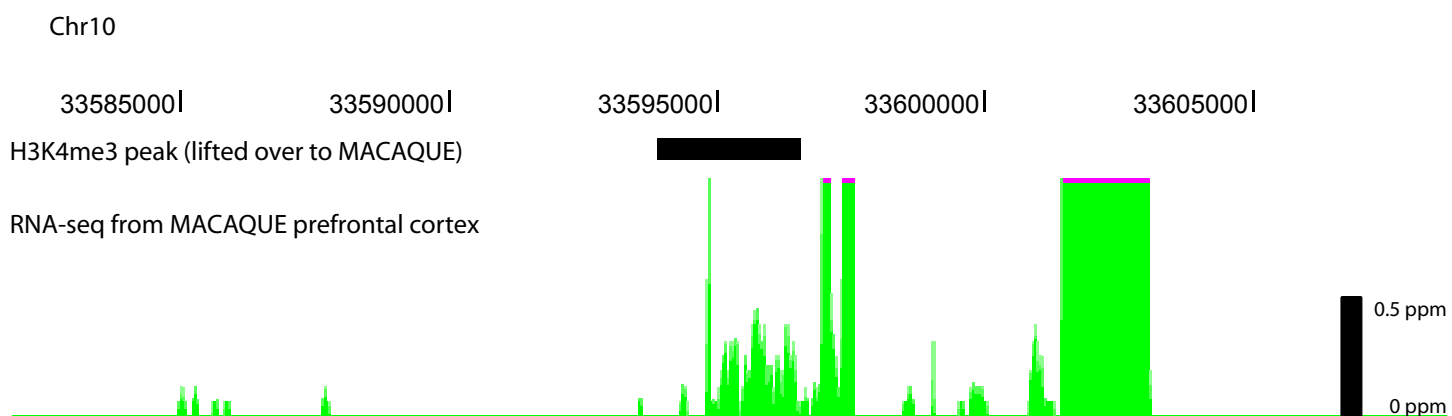

CHIMPANZEE 10x lifted-over around H3K4me3 peak

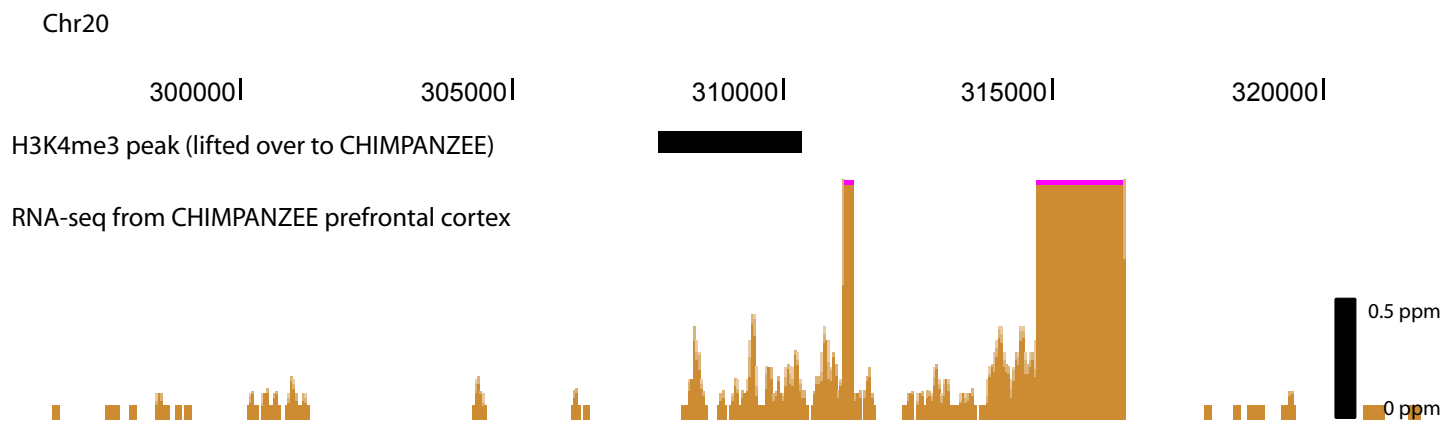

HUMAN 10x around H3K4me3 peak

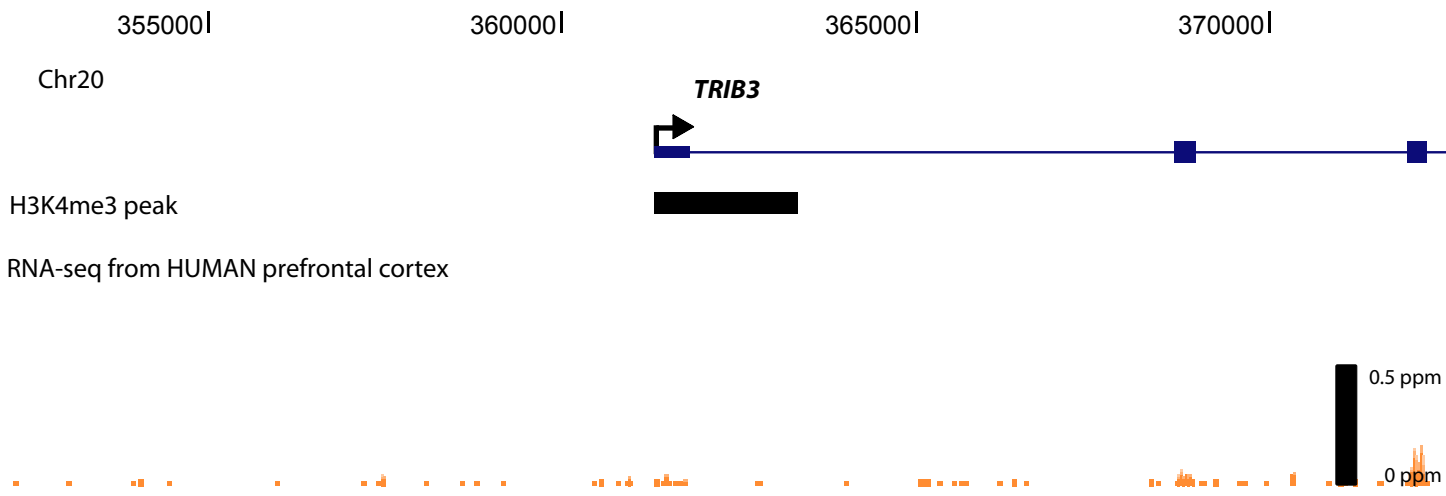

MACAQUE 10x lifted-over around H3K4me3 peak

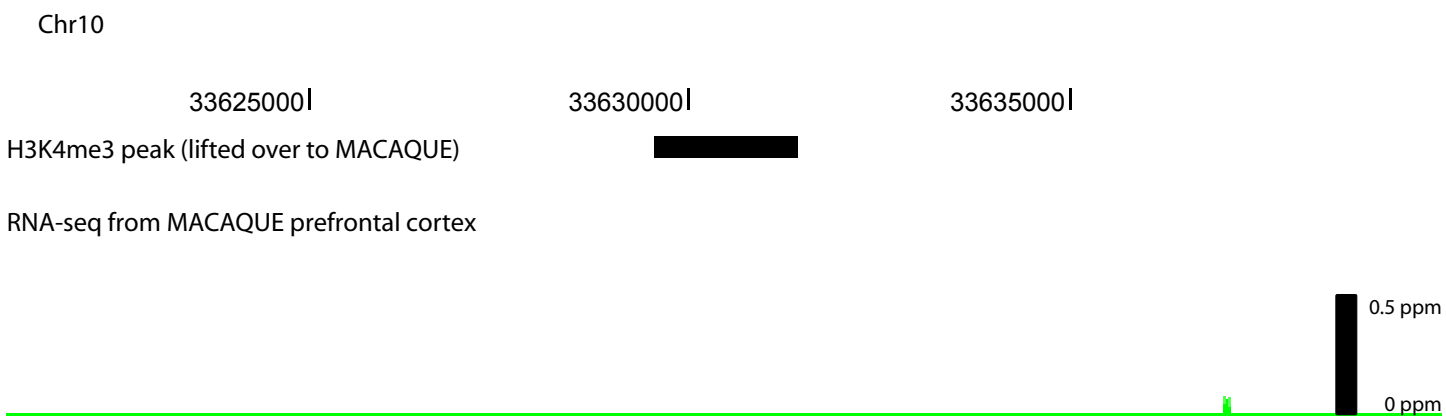

CHIMPANZEE 10x lifted-over around H3K4me3 peak

H3K4me3 peak (lifted over to CHIMPANZEE)

RNA-seq from CHIMPANZEE prefrontal cortex

HUMAN 10x around H3K4me3 peak

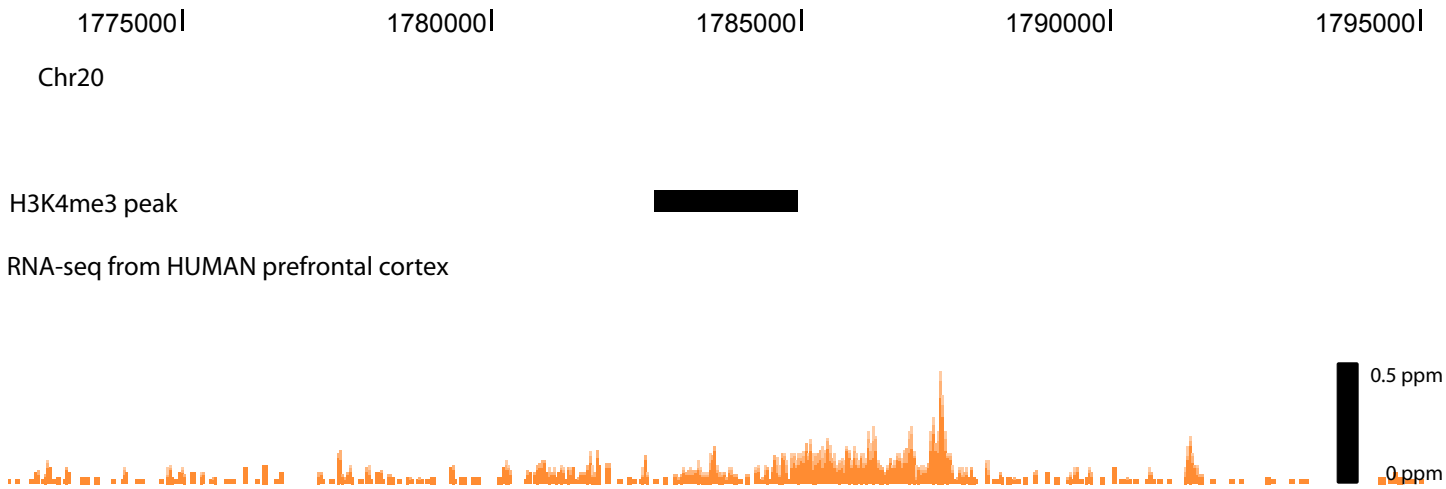

MACAQUE 10x lifted-over around H3K4me3 peak

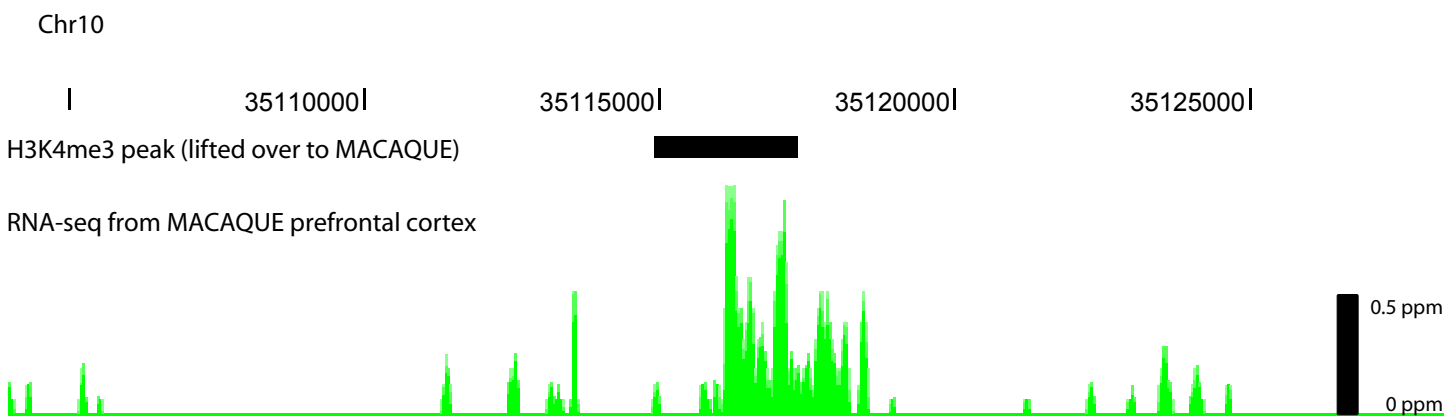

CHIMPANZEE 10x lifted-over around H3K4me3 peak

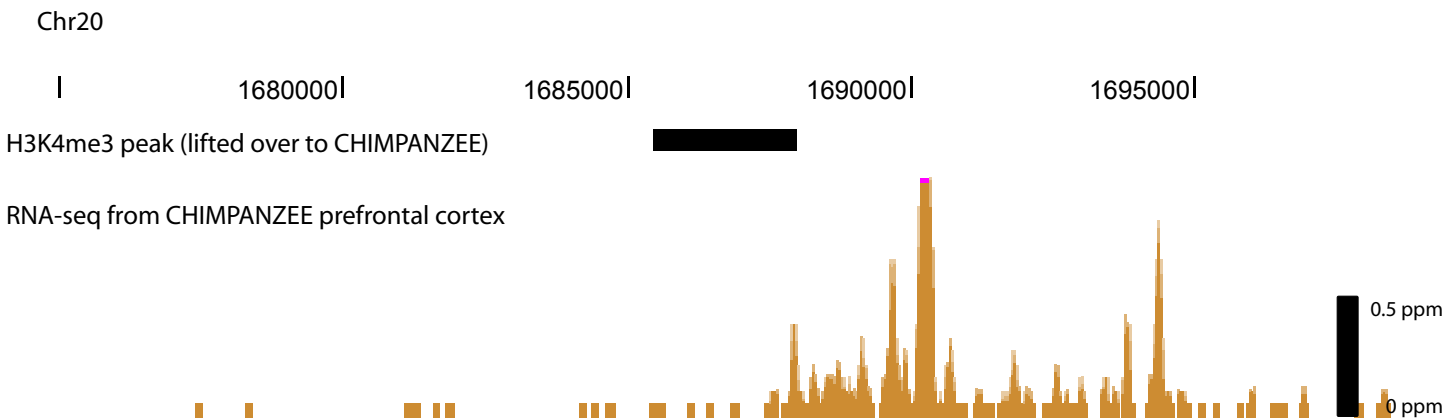

HUMAN 10x around H3K4me3 peak

| 5481000| 5482000| 5483000| 5484000| 5485000| 5486000| 5487000| 5488000| 5489000| 5490000|

Chr20

**LOC149837**

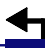

H3K4me3 peak



RNA-seq from HUMAN prefrontal cortex

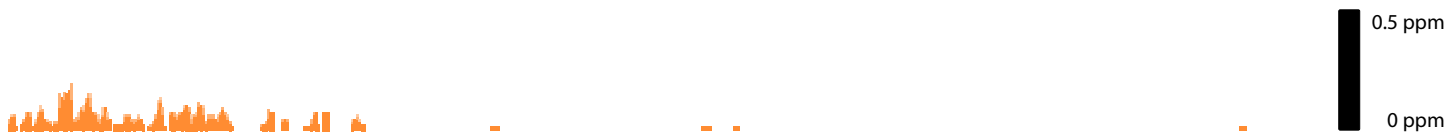

MACAQUE 10x lifted-over around H3K4me3 peak

Chr10

| 38801000| 38802000| 38803000| 38804000| 38805000| 38806000| 38807000| 38808000| 38809000| 38810000|

H3K4me3 peak (lifted over to MACAQUE)



RNA-seq from MACAQUE prefrontal cortex

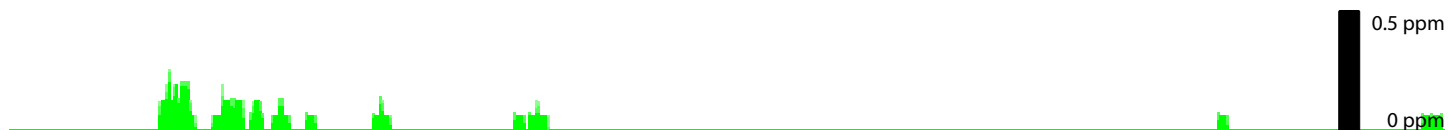

CHIMPANZEE 10x lifted-over around H3K4me3 peak

Chr1

| 5406000| 5407000| 5408000| 5409000| 5410000| 5411000| 5412000| 5413000| 5414000| 5415000|

H3K4me3 peak (lifted over to CHIMPANZEE)



RNA-seq from CHIMPANZEE prefrontal cortex

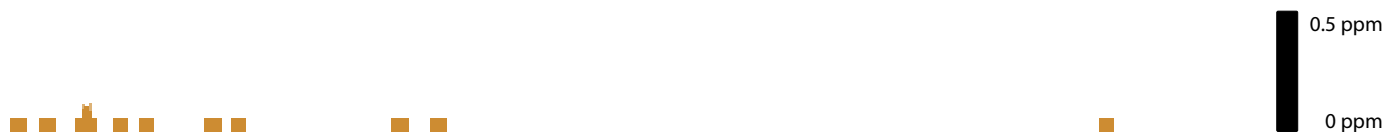



HUMAN 10x around H3K4me3 peak

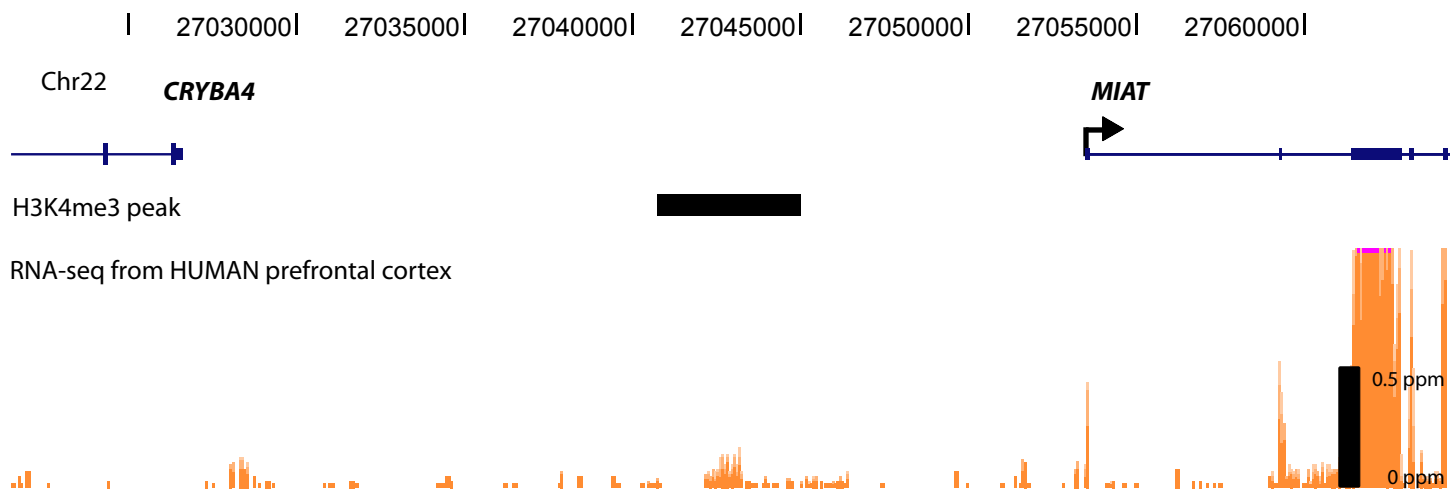

MACAQUE 10x lifted-over around H3K4me3 peak

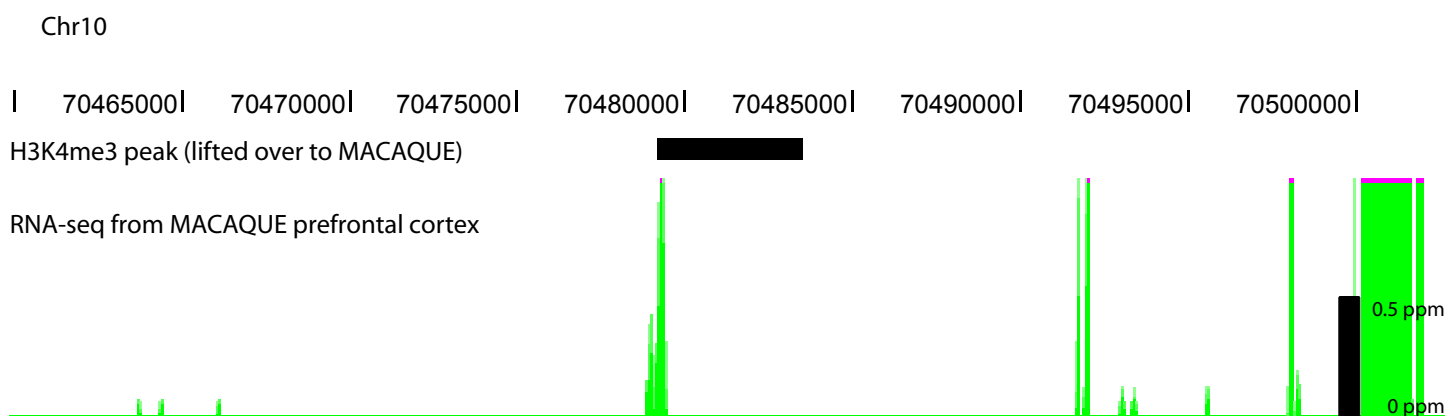

CHIMPANZEE 10x lifted-over around H3K4me3 peak

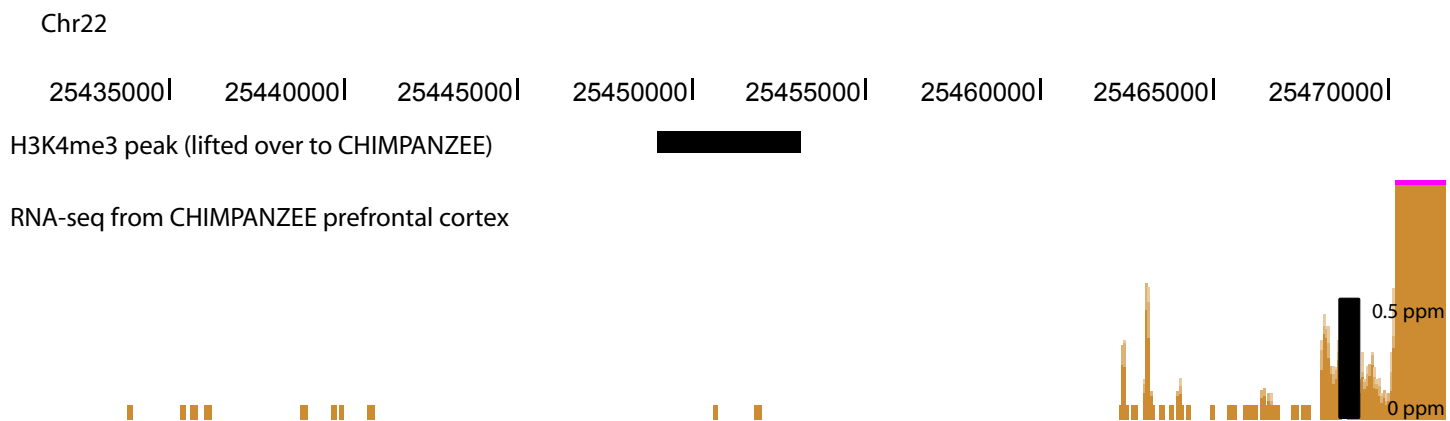

HUMAN 10x around H3K4me3 peak

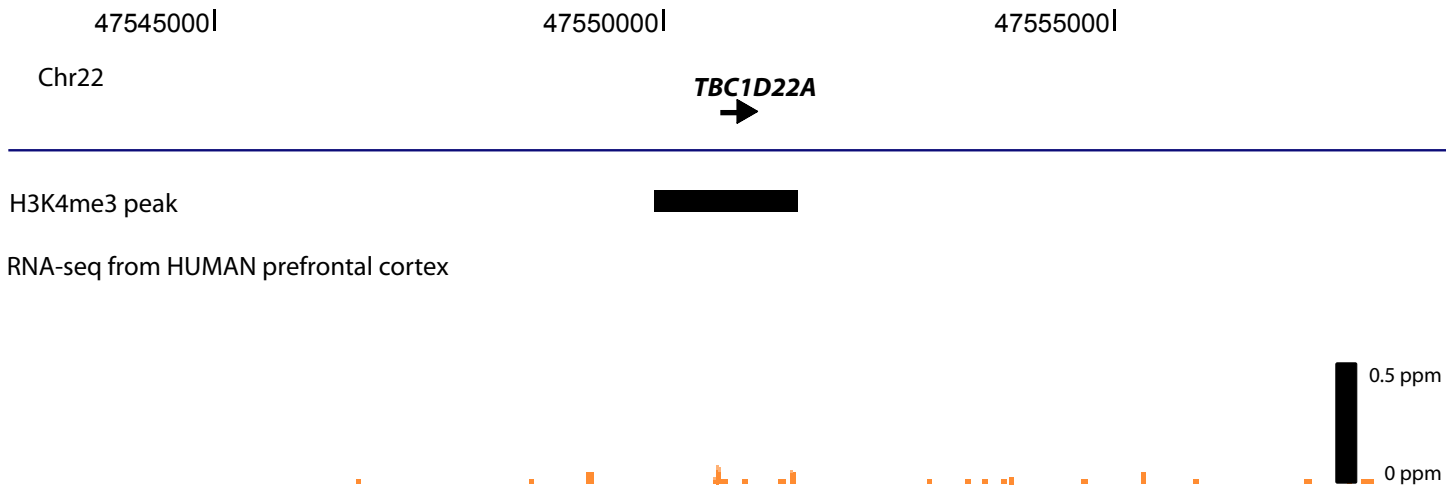

MACAQUE 10x lifted-over around H3K4me3 peak

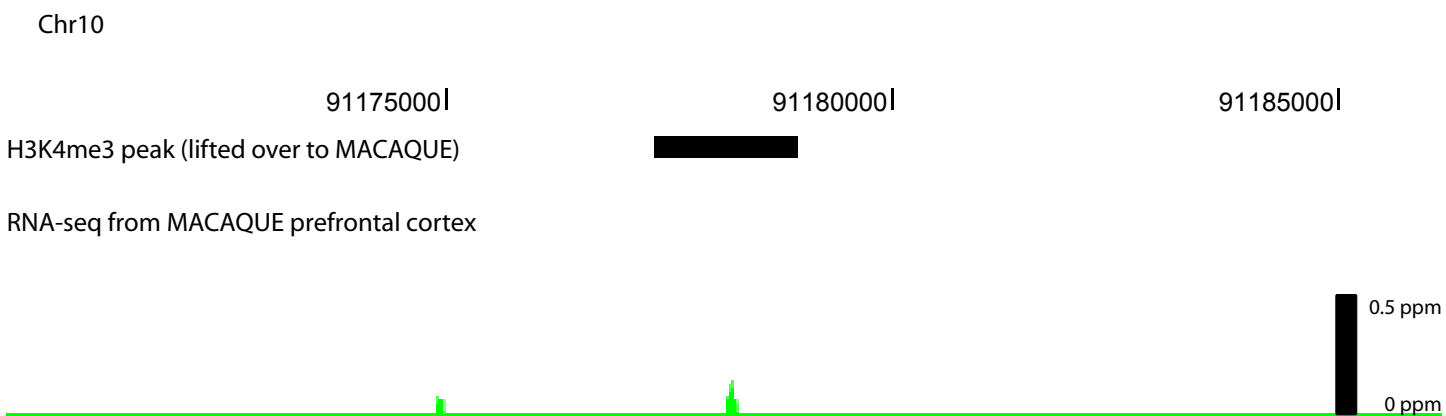

CHIMPANZEE 10x lifted-over around H3K4me3 peak

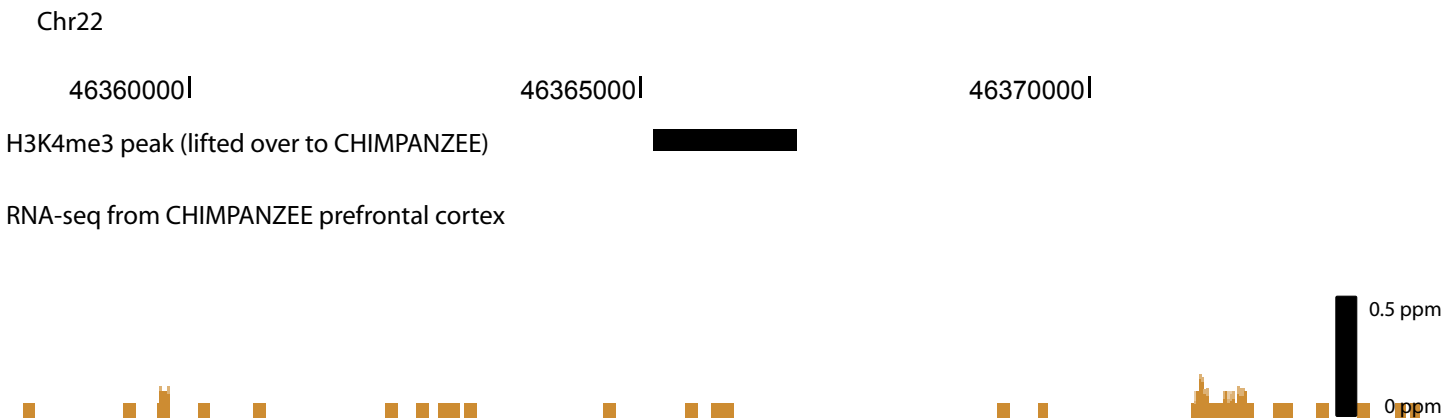

Supplement: pbio.1001427.s002.pdf [file pbio.1001427.s002.pdf]
