# Supplementary material for: Human-Specific Histone Methylation Signatures at Transcription Start Sites in Prefrontal Neurons
Source: PLoS Biol. 2012 Nov 20;10(11):e1001427. doi: 10.1371/journal.pbio.1001427 (PMC3502543; doi:10.1371/journal.pbio.1001427)
Supplement: Table S8 — List of 337 H3K4me3 peaks selectively depleted in the chimpanzee, with at least 2-fold higher tag density in 11 humans compared to four chimpanzees. (XLSX) [file pbio.1001427.s011.xlsx]

## Sheet: ST8
Supplementary Table 8 (Shulha et al.) 337 Chimpanzee Depleted (vs Human) peaks in PT2
Coordinates(PT2)	TSS	DistanceToChimpTSS	Chimp/Human (PT2)	FDR	vs lifted HD(57)/HG(364)/none from HG19
chr1:10806423-10808247	CORT	194265	0.32384	0.000343592	HG	HD=human depleted in HG19
chr1:111131551-111133388	MIR197	57407	0.480247	9.3446e-06	none	HG=human gained in HG19
chr1:111871122-111871759	MIR197	680327	0.105506	0.00991237	HG
chr1:114256147-114257136	MIR197	3065352	0.390131	2.19798e-10	none
chr1:114292314-114293571	MIR197	3101519	0.307703	5.09641e-06	HG
chr1:114405815-114410846	MIR197	3215020	0.383644	7.76788e-31	none
chr1:114657461-114660008	PHGDH	3179282	0.306924	1.01962e-47	HG
chr1:128047508-128049214	GSTM3	0	0.22368	3.19246e-12	HG
chr1:128722049-128723657	PRPF3	610219	0.214277	4.86512e-06	none
chr1:128726648-128729244	PRPF3	604632	0.171209	1.3406e-10	none
chr1:128810707-128813932	PRPF3	519944	0.183323	3.83076e-39	HG
chr1:128830026-128832377	PRPF3	501499	0.376175	5.17654e-11	none
chr1:134131895-134132838	CKS1B	163	0.464851	0.000976036	none
chr1:135144015-135148851	LMNA	159611	0.444268	9.75892e-14	none
chr1:139199639-139201445	PIGM	109402	0.236727	3.93265e-05	HG
chr1:144757554-144758654	MIR557	2985802	0.444303	0.0221757	none
chr1:15801719-15803208	MIIP	3585125	0.431276	0.000118543	HG
chr1:16952828-16953635	HTR6	2793384	0.417153	0.0101759	none
chr1:181013596-181017368	MIR181A-1	2201315	0.384672	3.19704e-14	none
chr1:186595419-186604140	EIF2D	404850	0.200756	2.73109e-190	HG
chr1:2072341-2074221	DVL1	818169	0.337854	1.13669e-06	HG
chr1:2082291-2083247	DVL1	828119	0.273384	0.013332	HG
chr1:208551610-208552355	HIST1H3A	1853663	0.24401	0.00866665	none
chr1:208553012-208555875	HIST1H3A	1855065	0.189778	1.47054e-11	none
chr1:215043624-215044410	FAM89A	3396076	0.444782	0.0243818	none
chr1:23969879-23970410	LYPLA2	14433	0.310347	0.00559456	none
chr1:29077489-29078209	RCC1	275175	0.357834	0.045581	none
chr1:31066840-31067613	BSDC1	1751011	0.487141	0.0408473	none
chr1:32755620-32757318	BSDC1	61306	0.397993	1.05824e-05	none
chr1:41101372-41102890	MIR30E	314326	0.346345	1.67811e-05	none
chr1:42042217-42045284	SLFNL1	345912	0.372581	1.91307e-08	none
chr10:100687290-100688236	NDUFB8	182399	0.435653	0.0330602	none
chr10:101935730-101937761	MIR146B	894797	0.462506	2.67986e-05	HG
chr10:103293069-103294434	CYP17A1	34570	0.453742	0.00299481	none
chr10:104733759-104734983	GSTO1	19669	0.260033	3.36172e-05	HG
chr10:110057222-110058278	GSTO1	5343132	0.428417	0.01304	HG
chr10:124521442-124526734	MIR202	10010060	0.351429	7.07662e-14	none
chr10:134618905-134620561	MIR202	82111	0.491743	0.00144008	none
chr10:134885092-134887242	MIR1324-1	95720	0.43383	9.69948e-08	none
chr10:42633140-42634284	EIF3L	85690	0.356397	0.00139989	none
chr10:45140758-45142318	HNRNPF	1543460	0.495491	0.00763195	HG
chr10:46046593-46047862	ANXA8L1	868995	0.388325	0.000221937	none
chr10:46675410-46676477	ANXA8L1	240380	0.477954	0.000525079	HG
chr10:46694695-46696225	ANXA8L1	220632	0.325544	0.000784787	none
chr10:46718118-46719440	ANXA8L1	197417	0.316121	0.000543854	HG
chr10:4965389-4967000	IL2RA	1244901	0.299327	2.80781e-05	HG
chr10:5828683-5829300	IL2RA	382601	0.38283	0.025022	none
chr10:68313196-68313799	ANXA7	4310284	0.211388	0.00205272	none
chr10:68564905-68565409	ANXA7	4058674	0.233772	0.032664	none
chr10:69571789-69573131	ANXA7	3050952	0.41819	0.0101379	HG
chr10:72939324-72940033	ANXA7	315241	0.426542	0.0296326	none
chr10:7575178-7578499	IL2RA	1363277	0.470188	3.97841e-08	none
chr10:84653539-84654484	MIR346	1775519	0.390446	0.0179615	HG
chr10:87419116-87420167	MIR346	989113	0.334827	5.01958e-07	none
chr11:101097128-101097787	TMEM123	0	0.407142	0.0454437	HG
chr11:111014480-111015042	MIR34C	728137	0.369319	0.0136963	none
chr11:117033057-117033662	FXYD6	347112	0.490725	0.0347426	none
chr11:121824459-121825392	MIR100	742335	0.451421	0.000567968	none
chr11:122146381-122148518	MIR100	1064257	0.459741	0.00119864	none
chr11:128433533-128435396	ST14	791509	0.339517	0.000978823	none
chr11:1301534-1302782	DEAF1	548797	0.199547	0.000211033	HG
chr11:130475398-130479328	ST14	1248493	0.477398	1.73269e-08	none
chr11:132213249-132213977	OPCML	142679	0.300455	0.00232371	HG
chr11:132687499-132688052	OPCML	616929	0.267985	0.00365864	none
chr11:133442690-133445217	B3GAT1	118437	0.180578	3.09274e-11	HG
chr11:133652530-133653034	B3GAT1	88876	0.237015	0.0436129	HG
chr11:1736232-1737173	INS	474265	0.181861	0.000101585	HG
chr11:3207554-3209476	CD81	774642	0.468608	0.000293736	HG
chr11:34708205-34709982	EHF	205904	0.371588	8.06546e-07	HG
chr11:46789996-46792845	ATG13	350185	0.491944	6.84328e-05	none
chr11:49582181-49583407	NDUFS3	1444906	0.104315	9.98642e-08	none
chr11:60188972-60192193	PPP1R32	467659	0.488452	4.37019e-08	none
chr11:6511198-6512217	TPP1	35207	0.493598	0.0295376	none
chr11:67908338-67909831	MIR548K	664236	0.461029	0.0220992	none
chr11:69141030-69145342	MIR548K	566963	0.407781	3.1663e-14	HG
chr11:73802993-73803852	MIR326	90367	0.35938	0.0249394	HG
chr11:73804073-73805782	MIR326	91447	0.38325	7.91556e-06	HG
chr11:8581076-8582151	RPL27A	5484	0.478216	0.000688449	none
chr11:8811483-8812704	RPL27A	235891	0.450515	0.017898	none
chr12:102308719-102310007	PMCH	1002753	0.427251	0.00131687	none
chr12:115030850-115031731	RPL6	1254978	0.479175	0.017835	none
chr12:123033633-123034222	PSMD9	512287	0.181952	0.0174872	none
chr12:126825727-126826289	UBC	862	0.316756	0.00711402	none
chr12:127907640-127909666	UBC	1080489	0.390404	4.72824e-06	HG
chr12:2123591-2124725	WNK1	1347563	0.421379	0.0129924	HG
chr12:23711500-23712270	MIR548C	1142786	0.394846	0.0248573	HG
chr12:4314014-4314964	NDUFA9	497380	0.390681	0.00340855	none
chr12:56446123-56447783	MIR1244-6	6958937	0.47506	0.00298088	HG
chr12:57090644-57091267	MIR1244-6	7603458	0.154157	0.00987468	none
chr12:7414083-7415237	C1R	15707	0.401849	0.00433721	none
chr12:75425-77795	WNK1	698233	0.370302	1.70144e-33	HG
chr12:8346894-8347727	LOC100170034	197325	0.466827	0.000970952	none
chr13:109648875-109649865	PCID2	5019921	0.352822	0.00434107	none
chr13:112256180-112257142	PCID2	2412644	0.413098	0.0329556	none
chr13:18128367-18129618	CENPJ	6379188	0.287541	2.65765e-07	none
chr13:18148901-18150002	CENPJ	6358804	0.124017	5.30608e-08	none
chr13:20862507-20863515	CENPJ	3645291	0.330693	0.00139285	HG
chr13:23161966-23163932	CENPJ	1344874	0.43072	1.45408e-06	HG
chr13:26634860-26635864	PDX1	949403	0.202298	4.82586e-05	HG
chr13:52443718-52444940	MIR759	211384	0.205689	5.12422e-07	HG
chr13:70252938-70255051	MIR1297-1	16059135	0.324326	6.32669e-06	none
chr13:75912761-75914994	MIR622	14943210	0.466493	0.00363866	none
chr14:100109424-100110508	MIR342	397110	0.46691	0.00537272	HG
chr14:104974276-104975098	MIR203	359037	0.473431	0.0485498	none
chr14:23072986-23074994	TINF2	72080	0.45919	0.000110984	none
chr14:29855567-29857632	MIR624	140428	0.421237	2.42241e-05	none
chr14:37357841-37362232	PSMA6	2982885	0.45264	6.48445e-12	none
chr14:61467732-61468277	RTN1	2225847	0.164226	0.00983727	none
chr14:67225070-67225843	VTI1B	0	0.390587	0.0188015	none
chr14:69216494-69217663	SYNJ2BP	840879	0.388991	0.00105864	none
chr14:81058187-81059367	DIO2	981233	0.181791	1.38933e-10	HG
chr14:92015136-92016011	MIR1244-8	198362	0.401541	0.0407227	HG
chr15:21058096-21060457	SNURF	1296965	0.394486	4.20818e-05	HG
chr15:29500891-29503463	SCG5	77630	0.37497	3.01291e-05	HG
chr15:62808951-62809576	MIR1272	448241	0.405226	0.00445919	none
chr15:80288063-80289008	IL16	1011836	0.240569	0.00364231	none
chr15:80603329-80604382	IL16	1327102	0.444242	0.0096613	none
chr15:82619431-82620822	MIR1276	796415	0.311232	2.66675e-08	none
chr15:83264994-83267012	MIR1276	150225	0.297574	0.000540617	HG
chr15:90193544-90195206	ST8SIA2	0	0.458958	0.000204202	none
chr15:93208420-93209461	FAM174B	2748147	0.47238	0.00711347	none
chr16:2251373-2252441	MIR1225	64540	0.471829	0.000434883	HG
chr16:2305625-2307387	MIR572	62044	0.474049	0.00217035	none
chr16:2828365-2829018	MIR940	455057	0.305226	0.0132839	HG
chr16:30386951-30387987	ALDOA	60752	0.492754	0.0254138	none
chr16:30587107-30588929	ALDOA	138368	0.305846	3.21182e-21	none
chr16:30589502-30590576	ALDOA	140763	0.318977	3.34325e-06	none
chr16:3311729-3313710	MTRNR2L4	167118	0.234765	4.29151e-07	HG
chr16:405662-407544	FAM195A	237298	0.448416	8.2855e-05	none
chr16:46006190-46006846	SIAH1	1609498	0.185664	0.000483297	HG
chr16:56089504-56090632	MT1G	4528	0.305165	0.00432219	HG
chr16:67591007-67592453	DPEP2	166379	0.452584	1.64061e-05	none
chr16:75054968-75056048	ZNRF1	117960	0.485508	0.00362213	none
chr16:85443179-85444346	COX4I1	653261	0.465881	0.0220233	none
chr16:89648242-89649432	MC1R	703098	0.391288	9.50542e-05	HG
chr16:89662978-89663620	MC1R	688910	0.330245	0.0453073	HG
chr16:90354876-90356582	MC1R	2346	0.456127	4.71344e-05	none
chr17:10347400-10349037	MIR152	634087	0.220586	0.000100827	HG
chr17:10419670-10421124	MIR152	706357	0.464906	0.00296708	HG
chr17:11107735-11109535	STH	381972	0.380931	2.73719e-23	none
chr17:11119032-11121297	STH	370210	0.393557	4.93172e-15	none
chr17:12011314-12012526	MAPT	481075	0.400477	2.23648e-09	HG
chr17:14184376-14188457	BRCA1	202100	0.344293	3.26168e-14	none
chr17:17475121-17477237	PSMD3	82593	0.485218	0.00062563	none
chr17:19284280-19284956	CWC25	546811	0.422822	0.0294433	HG
chr17:19396401-19397192	CWC25	658932	0.299609	0.00148041	none
chr17:20787093-20787910	ZNHIT3	164489	0.402468	0.0451716	HG
chr17:21928347-21930352	AMAC1L3	50124	0.278564	2.90294e-09	HG
chr17:23164625-23165446	CCT6B	940321	0.418156	5.36033e-05	none
chr17:34681892-34683989	FAM83G	2475875	0.139053	1.29337e-08	HG
chr17:39237650-39239244	PLD6	177522	0.466912	0.000965921	none
chr17:48309300-48309926	XYLT2	1019957	0.460222	0.0405989	none
chr17:48354569-48355233	XYLT2	974650	0.252085	0.00432414	HG
chr17:48435297-48436701	XYLT2	893182	0.371645	0.00142758	none
chr17:57504608-57506136	MIR142	1295	0.481093	0.000225029	none
chr17:61713310-61714271	ACE	1032344	0.410019	0.000222762	none
chr17:74598709-74599292	HN1	126328	0.429116	0.0101002	none
chr17:8210687-8211942	PHB	143631	0.485579	0.019079	HG
chr18:12760201-12761491	TGIF1	498017	0.284647	0.00557116	HG
chr18:13421362-13422311	TGIF1	161854	0.402593	0.00764488	HG
chr18:16205309-16206298	TYMS	62960	0.171259	0.000227556	HG
chr18:26998191-27000183	TTR	492006	0.442648	1.30742e-05	none
chr18:28693221-28693985	TTR	1201032	0.354918	0.0247758	none
chr18:74013730-74014954	MBP	69542	0.391921	0.00251529	HG
chr19:10177882-10181135	PPAN	170843	0.411523	2.70663e-08	none
chr19:11986332-11987460	MIR199A-1	892605	0.246116	4.38367e-06	HG
chr19:12168648-12169453	MIR199A-1	1074921	0.11519	9.82271e-08	none
chr19:1293361-1294679	NDUFS7	63015	0.329201	0.000270225	HG
chr19:14408366-14409319	MIR181D	134235	0.433419	0.00534996	none
chr19:1480695-1482044	NDUFS7	123001	0.46948	0.00645909	none
chr19:22134707-22135887	NDUFA13	2118319	0.46695	0.000189574	HG
chr19:23285459-23286515	NDUFA13	3269071	0.348912	0.00105321	HG
chr19:23327098-23328057	NDUFA13	3310710	0.190475	4.96144e-05	HG
chr19:33081744-33082584	WDR88	5483522	0.0676609	9.71305e-10	HG
chr19:33089200-33091515	WDR88	5474591	0.0619648	1.74647e-34	HG
chr19:39835871-39836839	SCN1B	693955	0.2978	0.00708522	HG
chr19:40643551-40646056	LSR	102458	0.492866	2.96265e-05	none
chr19:41301596-41302601	ZBTB32	84172	0.114122	4.88488e-07	HG
chr19:41368988-41369905	TYROBP	55825	0.36732	0.00772318	HG
chr19:42070234-42071014	ZNF565	323879	0.286241	0.017425	HG
chr19:42778257-42780670	ZNF566	168490	0.304492	1.41827e-07	none
chr19:44330343-44330888	PSMD8	400960	0.379701	0.0328516	none
chr19:45377653-45378937	SELV	272871	0.498788	4.69286e-05	none
chr19:45796735-45797866	MIR641	67974	0.463721	0.00859201	none
chr19:4847221-4848364	MIR7-3	0	0.43582	0.00061219	none
chr19:52670485-52671488	SAE1	93686	0.271158	0.0132361	HG
chr19:53561541-53562671	SEPW1	135005	0.355635	0.00589319	none
chr19:54464491-54465028	FUT1	907	0.332776	0.0450368	HG
chr19:55541160-55543236	AKT1S1	77871	0.455844	0.0015834	HG
chr19:55549167-55550770	AKT1S1	70337	0.433302	0.000463923	none
chr19:56187041-56189106	KLK3	335291	0.218898	3.63356e-15	HG
chr19:61224078-61224660	NCR1	604159	0.490675	0.0293495	none
chr19:62161766-62162619	ZSCAN5A	89704	0.398251	0.00037785	none
chr19:64229918-64231941	ZNF8	68957	0.346089	4.65057e-09	HG
chr19:8123949-8124733	SNAPC2	16585	0.389989	0.000832095	none
chr19:8145629-8147151	SNAPC2	4311	0.47988	0.000291841	none
chr19:8624952-8625707	NDUFA7	72475	0.430346	0.0327483	none
chr20:19977239-19979005	BANF2	2086794	0.369034	3.60921e-07	HG
chr20:244090-244794	DEFB132	35195	0.476192	0.0219479	none
chr20:25497213-25498484	GZF1	1834077	0.458097	0.021873	HG
chr20:30496369-30497258	C20H20orf144	180587	0.43277	0.0217986	HG
chr20:35081253-35082951	RPRD1B	129870	0.488819	0.00643273	none
chr20:3682435-3684772	MIR103-2	138428	0.406978	1.52008e-06	HG
chr20:5409397-5410386	PRNP	805927	0.371072	0.00338353	HG
chr20:61924711-61925660	SAMD10	24075	0.43581	0.0217247	HG
chr22:15895037-15896715	C22H22orf29	2420169	0.0996744	7.94462e-14	HG
chr22:15985902-15988135	C22H22orf29	2328749	0.3623	1.01284e-05	none
chr22:17345233-17346149	C22H22orf29	970735	0.49911	0.000558125	HG
chr22:17402990-17403819	C22H22orf29	913065	0.344287	0.0102103	none
chr22:19105371-19106284	MIR1286	372654	0.146164	2.41448e-05	none
chr22:25450156-25453075	MIR548J	90578	0.190862	2.94295e-10	HG
chr22:25564623-25565158	MIR548J	205045	0.413567	0.0243	none
chr22:26629883-26633234	MIR548J	1270305	0.448344	1.81362e-06	none
chr2a:101101387-101103255	ST6GAL2	6896075	0.239142	6.14362e-25	none
chr2a:111206314-111206917	CBWD2	3080353	0.279891	0.0246949	none
chr2a:111234910-111236703	CBWD2	3050567	0.424629	1.71559e-16	none
chr2a:111236929-111238772	CBWD2	3048498	0.432331	1.49944e-06	none
chr2a:111470657-111472642	CBWD2	2814628	0.219463	2.11728e-06	none
chr2a:111495100-111495600	CBWD2	2791670	0.429354	0.0242188	none
chr2a:113392900-113393618	CBWD2	893652	0.0264991	1.87853e-10	none
chr2a:43053871-43054997	MORN2	3344505	0.440555	0.00708513	none
chr2a:43055420-43057894	MORN2	3346054	0.369426	1.11633e-06	none
chr2a:4898754-4899462	RPS7	1783564	0.446203	0.0326456	HG
chr2a:56529620-56530355	RPS27A	8747	0.484153	0.0116332	none
chr2a:5835618-5838081	RPS7	2720428	0.400149	1.00503e-07	none
chr2a:70807988-70809264	GMCL1	533831	0.404713	0.00443997	HG
chr2a:88662122-88663309	ST3GAL5	878168	0.359023	3.79639e-10	HG
chr2a:88663736-88665622	ST3GAL5	879782	0.470054	5.59615e-05	HG
chr2a:92004094-92004649	ST3GAL5	4220140	0.0404534	0.000289039	none
chr2a:92004851-92005722	ST3GAL5	4220897	0.0893331	0.000204571	none
chr2a:92104739-92106806	ST3GAL5	4320785	0.019788	1.61181e-68	HG
chr2a:92131215-92133039	ST3GAL5	4347261	0.073112	4.10024e-12	none
chr2a:92169277-92170768	ST3GAL5	4385323	0.0364437	1.1347e-27	none
chr2a:96595473-96596316	ST3GAL5	8811519	0.4029	0.0325436	none
chr2b:136348047-136348797	MIR128-1	3486233	0.0511802	3.79518e-05	none
chr2b:136435281-136435925	MIR128-1	3399105	0.494256	0.0253316	none
chr2b:183558135-183559675	SESTD1	677468	0.476885	0.00360574	none
chr2b:193541990-193545343	MIR561	2903	0.489453	9.75524e-08	none
chr2b:224797986-224799132	MIR375	133108	0.38397	0.024138	none
chr2b:237910005-237912239	PTMA	23021	0.38497	0.000494446	HG
chr3:101688695-101690314	MIR1255B	223063	0.478151	0.00143299	none
chr3:11041824-11042404	MIR885	352780	0.354384	0.0246144	HG
chr3:134059195-134061085	MIR1280	1275886	0.402717	4.13218e-07	none
chr3:189907908-189908759	MIR1224	145596	0.433869	0.0324422	none
chr3:19575268-19576560	MIR548I-2	4072570	0.469382	0.000753375	HG
chr3:203343912-203345062	MIR922	10343	0.46236	9.20294e-06	HG
chr3:38859505-38860755	MIR26A-1	22653	0.466748	0.00478336	HG
chr3:40288158-40288945	CX3CR1	134017	0	4.795e-05	none
chr3:50865336-50868854	GPX1	342099	0.300243	5.73802e-42	HG
chr3:65896876-65899882	MIR548F-2	3510652	0.481027	1.34407e-06	none
chr3:77626241-77627391	MIR1284	4226984	0.408188	1.42879e-05	HG
chr3:77643625-77644755	MIR1284	4244368	0.23172	0.000186858	HG
chr3:89383970-89385466	HTR1F	921778	0.409545	8.24438e-06	HG
chr4:109268652-109270665	NHEDC2	2870223	0.309424	3.43819e-07	HG
chr4:121836339-121837279	PRSS12	90796	0.139104	0.000226018	HG
chr4:122218197-122219466	PRSS12	290122	0.369554	6.8704e-05	none
chr4:6047149-6048761	MSX1	1087167	0.392377	5.13573e-07	none
chr5:124529101-124530730	MIR1244-9	4163672	0.406156	0.000824688	none
chr5:139774501-139775380	MIR874	414134	0.451389	0.00574547	none
chr5:142117711-142118649	EIF4EBP3	184158	0.236997	0.00178903	HG
chr5:149310183-149310861	ADRB2	1455519	0.205768	0.00863292	HG
chr5:149438814-149439959	ADRB2	1326421	0.487738	0.00142597	none
chr5:152649202-152650210	IRGM	183143	0.396502	0.00761478	HG
chr5:159701501-159703036	PTTG1	2807399	0.351673	3.06835e-06	HG
chr5:162395876-162397318	PTTG1	113117	0.330166	0.000780427	none
chr5:1682492-1683019	NDUFS6	175832	0.400645	0.00586894	none
chr5:178344537-178346266	HRH2	290663	0.45187	5.42764e-12	none
chr5:178537192-178538779	HRH2	483318	0.265407	0.000348201	none
chr5:183658603-183659725	MIR340	1156795	0.211266	0.000912608	HG
chr5:19670325-19670940	GLRX	12715	0.484924	0.0484058	HG
chr5:32172018-32175185	COX7C	3085659	0.375888	8.59247e-07	HG
chr5:32175200-32176155	COX7C	3088841	0.461946	0.0216513	none
chr5:44235845-44237070	MAP1B	390266	0.465728	0.0129452	none
chr5:45247410-45247977	MAP1B	1401831	0.17968	0.000978547	none
chr5:46018211-46019549	MAP1B	2172632	0.343739	5.45721e-12	none
chr5:46083558-46085645	MAP1B	2237979	0.496282	0.000970503	HG
chr5:60684463-60686452	MIR449B	67532	0.351903	1.66257e-05	none
chr5:65340600-65341975	NDUFS4	2947963	0.443926	2.45759e-08	none
chr6:108787016-108788463	FIG4	2768724	0.271709	0.000659095	none
chr6:125928684-125929382	ECHDC1	3629410	0.221587	0.00859946	none
chr6:146120901-146121933	GRM1	2474775	0.494959	0.0346357	none
chr6:152591913-152592973	GRM1	3995205	0.30651	0.00705665	HG
chr6:28277789-28278667	ZNF192	352662	0.102176	1.64379e-05	HG
chr6:29000526-29002046	GPX6	26019	0.399067	0.000827548	none
chr6:29161926-29163013	GPX5	123642	0.394606	0.00442092	HG
chr6:30143335-30144130	HLA-F	91239	0.377904	0.0323415	none
chr6:32386182-32387696	CFB	123972	0.444417	0.00962429	HG
chr6:3252013-3253956	FARS2	2074346	0.433824	5.10635e-07	HG
chr6:40618390-40619613	NCR2	1658513	0.488544	0.000622013	none
chr6:60219075-60219793	ELOVL5	5667724	0.105118	3.76302e-05	none
chr6:7381274-7382180	FARS2	2052972	0.223938	0.000787601	HG
chr6:76076986-76081009	COX7A2	38251	0.393917	1.32686e-07	none
chr7:100769242-100770303	TRIP6	20716	0.466905	0.00358949	none
chr7:102435829-102437359	TRIP6	1687303	0.350964	1.96128e-07	none
chr7:112496284-112497265	FOXP2	2064375	0.160788	5.53396e-07	none
chr7:116699110-116700275	CAV2	901	0.447363	0.0115904	none
chr7:144418913-144421120	TAS2R41	165618	0.484112	8.70188e-09	none
chr7:149943668-149945148	CUL1	613132	0.479655	0.000618438	none
chr7:157996800-157997400	MIR153	452654	0.416244	0.00572163	none
chr7:22235861-22236819	MIR1183	478178	0.340924	0.00138589	HG
chr7:26275178-26276565	MIR148A	432	0.496666	0.0190127	none
chr7:29324897-29328292	CPVL	170166	0.462198	9.77541e-07	none
chr7:3250609-3251446	MIR589	2231762	0.105867	0.000950728	none
chr7:41355630-41356752	GLI3	644129	0.232335	0.000907702	HG
chr7:52419177-52420439	MRPS17	4554470	0.27679	0.000287658	HG
chr7:53067619-53068557	MRPS17	3906352	0.186135	0.000464511	HG
chr7:5504148-5504857	ACTB	16156	0.480461	0.00157578	none
chr7:64653059-64653929	CRCP	1078283	0.450113	0.000202754	HG
chr7:72842540-72844042	MIR590	941958	0.487994	4.65471e-05	none
chr7:74402323-74404267	MIR590	616323	0.380872	2.21446e-11	none
chr7:74466762-74468656	MIR590	680762	0.464636	6.8359e-09	none
chr7:74601802-74603805	MIR590	815802	0.225816	3.12927e-14	none
chr7:74604723-74605935	MIR590	818723	0.233041	6.05811e-14	none
chr7:75023173-75024988	MIR590	1237173	0.476513	0.000269761	none
chr7:75025511-75026509	MIR590	1239511	0.463589	0.00532738	none
chr8:116319101-116320187	ZHX1	6493895	0.450491	0.00399373	HG
chr8:129596820-129597941	MIR1208	1835923	0.471467	0.0240578	none
chr8:144405545-144407608	MIR1234	14107	0.298071	1.83289e-05	none
chr8:29299261-29303023	TTI2	881205	0.442012	2.56185e-06	none
chr8:46716510-46717538	MIR320D-2	861969	0.459299	0.00397606	HG
chr8:46900500-46904051	MIR320D-2	1045959	0.362276	3.11566e-08	none
chr8:54476826-54477513	XKR4	1238034	0.251446	0.000413538	HG
chr8:92928983-92930042	MIR599	5559119	0.410517	0.0100628	HG
chr9:11273326-11274199	RBMX	4410752	0.428989	0.000279158	none
chr9:136973414-136974451	MIR126	53668	0.480893	0.00068456	none
chr9:35674980-35675999	IL11RA	346983	0.485094	0.0345294	none
chr9:35676071-35681180	IL11RA	348074	0.490563	3.24808e-09	none
chr9:35852397-35853871	IL11RA	524400	0.328991	0.00043616	none
chr9:39810354-39810887	IL11RA	4482357	0.213407	0.000227112	none
chr9:42582556-42583939	IL11RA	7254559	0.276812	3.27112e-22	none
chr9:42714049-42715581	IL11RA	7386052	0.283587	9.42136e-11	none
chr9:461699-462529	MIR101-2	4489985	0.253271	0.00702831	HG
chrX:103561338-103562395	MORF4L2	237916	0.40843	0.0177724	none
chrX:138634602-138636997	F9	337115	0.492386	0.00141901	none
chrX:47466484-47467458	NDUFB11	14442	0.480859	0.0252499	none
chrX:77941-78825	MIR651	7888310	0.308189	0.010172	none
chrX:91180962-91184439	PABPC5	350123	0.309353	5.47298e-15	none
