# Supplementary material for: Human-Specific Histone Methylation Signatures at Transcription Start Sites in Prefrontal Neurons
Source: PLoS Biol. 2012 Nov 20;10(11):e1001427. doi: 10.1371/journal.pbio.1001427 (PMC3502543; doi:10.1371/journal.pbio.1001427)
Supplement: Table S11 — Nucleotide substitution rates for the 33 neuHP defined by human-specific gain and neuron-specific enrichment. Baseml (for genomic sequence) and codeml (for amino acid sequence) was to calculate branch- and site-specific nucleotide substitution rates, using human, chimpanzee, gorilla, orangutan, and macaque genome sequences. (XLSX) [file pbio.1001427.s014.xlsx]

## Sheet: ST11
Supplementary Table 11 (Shulha et al.) Results showing human-specific acceleration or conservation
Baseml was used to estimate branch-specific nucleotide substitution rates for alignments containing human, chimpanzee, orangutan, and macaque sequences. Of the
32 peak regions below, 23 showed 1:1 orthology between all 4 primate species, using UCSC's liftover utility. Nucleotide substitution rates were not estimates for the
remaining 9 regions. Codeml was used to anlyze boh site-specific, and human-branch-specific amino acid substitution rates. The alignments for codeml contained
sequences from 5 primate species: human, chimpanzee, gorila, ornagutan, and macaque. Only 19 out of 30 genes contained annotated 1:1 orthologs in all 5 primate
species, using Ensembl's BioMart tool. Only significant results with p < 0.01 are shown.
				baseml branch model		codeml sites model		codeml branch model
Coordinates	NearestTSS	TSS	DistanceToTSS	p < 0.01	nucleotide subsitution rate (human branch)	p < 0.01	dN/dSe	p < 0.01	dN/dS (human branch)
chr1:145037804-145040692	143787436	PDE4DIPd	35387
chr1:147717685-147719570c,d	146076705	NBPF11d	107604
chr10:103328874-103331401	103337963	POLL	16572
chr10:109673385-109675834	108914282	SORCS1	749093					0.000416988	0.0001
chr10:81741180-81742583b,d	81698841	SFTPD	32319
chr10:830316-831468	725608	DIP2C	94708					1.00418e-06	0.03
chr11:857724-860732	834445	TSPAN4	13279	1.03806e-05	0.29628
chr13:31626584-31631064	30634117	HSPH1	105053					0.015781	0.0001
chr15:98195675-98196486	96218663	LOC91948d	221173
chr17:21475991-21477731	21395534	C17orf51d	21050
chr18:73627718-73628912	71268577	C18orf62d	488129
chr18:74798658-74800451	72973762	MBP	44323
chr18:903446-909852	895296	ADCYAP1	0	1.16996e-24	4.89596
chr19:17558365-17559781a	17432725	NXNL1	11944					0.0154386	0.0001
chr19:51016136-51018764	55709759	ASPDH	0			0.0056005	7.284
chr2:115419153-115420608	114916368	DPP10	219255	1.15806e-07	4.17615
chr2:115917965-115921773	115636201	DPP10	0	1.74857e-16	4.38868
chr2:132794729-132796576b,d	132635995	NCRNA00164d	122949
chr2:133013735-133016150b,d	132732012	NCRNA00164d	0
chr20:1782608-1784925	1822812	SIRPAd	89887	0.00125938	2.24267
chr20:326778-329498	275369	NRSN2	0	0.00109164	1.92204
chr20:361304-363330a	309307	TRIB3	0					0.000991482	0.1822
chr20:5484588-5485659c	5433242	LOC149837d	0
chr22:27040777-27045045c	25383483	MIATd	8438
chr22:47549899-47551490	45537212	TBC1D22A	391351
chr3:2139182-2142802	2117246	CNTN4	0	9.4991e-12	3.08255			6.96682e-05	0.0443
chr3:237095-242136	213649	CHL1	0	6.82076e-06	1.99227	0.0184944	3.323	0.00967991	0.1822
chr3:87137688-87139305	87122947	VGLL3	97431
chr5:146762173-146763181	146813453	DPYSL3	70079					0.0143451	0.0001
chr6:151814531-151816287	151856867	C6orf97	0
chr7:152621856-152623442	152087783	ACTR3B	165006
chr7:51538748-51540078	51352009	COBL	154233
aregions that were deleted in chimpanzee, i.e. intersected no chains using liftover
bregions that were duplicated in chimpanzee, i.e. intersected more than one chain in liftover
cregions that were duplicated in orangutan, i.e. intersected more than one chain using liftover
dregions that were duplicated in macaque
egenes that did not contain an ortholog in all five primate species used for codem
f Probability > 0.95 that dN/dS at that site is greater than 1
Regarding significances in codeml human branch model:Note that coding sequences show a highly significant decrease in dN/dS ratios , strongly suggesting purifying selection and increased constraint in the human branch as compared to the rest of the tree.
