# Supplementary material for: Human-Specific Histone Methylation Signatures at Transcription Start Sites in Prefrontal Neurons
Source: PLoS Biol. 2012 Nov 20;10(11):e1001427. doi: 10.1371/journal.pbio.1001427 (PMC3502543; doi:10.1371/journal.pbio.1001427)
Supplement: Table S18 — RNAseq normalized tag densities from human, chimpanzee, and macaque PFC, for HP sequences and their surrounding 1–2 kb. (XLSX) [file pbio.1001427.s021.xlsx]

## Sheet: ST18
Supplementary Table 18 (Shulha et al.) Expression analysis
HG19	HasSomeOverlapWith33	ext(HG19)	hg_in_ext(HG19)	pt_in_ext(HG19)	rm_in_ext(HG19)	liftToPT2	ext(liftToPT2)	pt_in_ext(liftToPT2)	liftToRM2	ext(liftToRM2)	rm_in_ext(liftToRM2)	Size(extHG19)	Size(extPT2)	Size(extRM2)	Chimp_HG19/Human_HG19	Macaque_HG19/Human_HG19	Chimp_PT2/Human_HG19	Macaque_RM2/Human_HG19
chr5:180257101-180259476	0	chr5:180255101-180261476	1499	283	8	chr5:183341944-183346616	chr5:183339944-183348616	604	chr6:177508914-177510897	chr6:177506914-177512897	33	6375	8672	5983	0.389828	0.0769724	1.01058	0.144479
chr9:68412383-68414762	0	chr9:68410383-68416762	1463	153	8	chrUn:10441689-10444057	chrUn:10439689-10446057	0	chr5:182020629-182022567	chr5:182018629-182024567	15	6379	6368	5938	0.233834	0.0787919	0.039328	0.0866801
chr19:1324638-1325993	0	chr19:1322638-1327993	654	5	0	chr19:1293475-1295834	chr19:1291475-1297834	2	chr19:1082526-1083708	chr19:1080526-1085708	0	5355	6359	5182	0.0975874	0.0840336	0.105837	0.0813188
chr11:134145237-134147491	0	chr11:134143237-134149491	557	20	0	chr11:133442677-133444889	chr11:133440677-133446889	23	chr14:132294930-132295396	chr14:132292930-132297396	0	6254	6212	4466	0.159983	0.0972447	0.163913	0.0694428
chr20:61732970-61734710	0	chr20:61730970-61736710	601	226	2	chr20:61022830-61024473	chr20:61020830-61026473	264	chr10:1280314-1281220	chr10:1278314-1283220	2	5740	5643	4906	0.752525	0.113464	0.803139	0.0916888
chr6:31785715-31787204	0	chr6:31783715-31789204	1402	484	26	chr6:32386202-32387694	chr6:32384202-32389694	520	chr4:31467286-31468921	chr4:31465286-31470921	520	5489	5492	5635	0.681788	0.174419	0.688101	2.03379
chr16:2653084-2654335	0	chr16:2651084-2656335	1517	192	30	chr16:2721706-2722980	chr16:2719706-2724980	447	chr20:2824660-2824797	chr20:2822660-2826797	232	5251	5274	4137	0.273692	0.180723	0.555834	0.662181
chr19:28283735-28286451	0	chr19:28281735-28288451	272	0	0	chr19:33081740-33091414	chr19:33079740-33093414	1	chr3:61434194-61437046	chr3:61432194-61439046	7	6716	13674	6852	0.180723	0.180723	0.379108	0.301717
chr19:58858059-58859888	0	chr19:58856059-58861888	359	113	3	chr19:64230114-64232022	chr19:64228114-64234022	111	chr4:95482645-95482868	chr4:95480645-95484868	73	5829	5908	4223	0.665178	0.196897	0.633333	0.792229
chr15:101457965-101461331	0	chr15:101455965-101463331	361	18	4	chr15:98956898-98961297	chr15:98954898-98963297	20	chr7:81045389-81048781	chr7:81043389-81050781	10	7366	8399	7392	0.22527	0.213777	0.260992	0.27304
chr17:66200897-66202809	0	chr17:66198897-66204809	407	149	9	N/A	N/A	N/A	chr16:63487065-63489022	chr16:63485065-63491022	133	5912	0	5957	0.746011	0.273019	N/A	1.69472
chr12:132673168-132675331	0	chr12:132671168-132677331	159	125	0	chr12:134286027-134287221	chr12:134284027-134289221	125	chr11:133525347-133526714	chr11:133523347-133528714	1	6163	5194	5367	1.3787	0.273973	1.1055	0.260277
chr19:35167687-35169380	0	chr19:35165687-35171380	445	112	11	N/A	N/A	N/A	chr19:41171172-41172892	chr19:41169172-41174892	24	5693	0	5720	0.548068	0.282178	N/A	0.379831
chr7:32800877-32802070	1	chr7:32798877-32804070	166	16	1	chr7:33128603-33129809	chr7:33126603-33131809	23	chr3:93391558-93392790	chr3:93389558-93394790	7	5193	5206	5232	0.402512	0.298673	0.451651	0.437695
chr4:165877815-165878871	0	chr4:165875815-165880871	158	0	1	N/A	N/A	N/A	chr5:157174291-157175356	chr5:157172291-157177356	3	5056	0	5065	0.275229	0.309633	N/A	0.350915
chr2:232549053-232551253	0	chr2:232547053-232553253	148	28	1	chr2b:237910036-237912239	chr2b:237908036-237914239	27	chr12:95553096-95555324	chr12:95551096-95557324	2	6200	6203	6228	0.549007	0.324519	0.524729	0.342449
chr19:33666765-33667914	0	chr19:33664765-33669914	144	26	1	chr19:38612422-38613372	chr19:38610422-38615372	29	chr19:39694872-39696012	chr19:39692872-39698012	4	5149	4950	5140	0.540797	0.330882	0.531228	0.400368
chr19:9895801-9897083	0	chr19:9893801-9899083	120	125	0	chr19:10017534-10020815	chr19:10015534-10022815	134	chr19:9581159-9582069	chr19:9579159-9584069	15	5282	7281	4910	1.67742	0.333333	2.32527	0.73239
chr16:2722632-2724026	0	chr16:2720632-2726026	155	12	2	chr16:2783669-2785689	chr16:2781669-2787689	18	N/A	N/A	N/A	5394	6020	0	0.387097	0.348837	0.481343	N/A
chr3:237734-240480	1	chr3:235734-242480	192	51	4	chr3:250804-254018	chr3:248804-256018	110	chr2:60837634-60840369	chr2:60835634-60842369	29	6746	7214	6735	0.6298	0.357143	1.10332	0.864389
chr17:21476186-21477764	1	chr17:21474186-21479764	105	3	0	chr17:34682372-34683963	chr17:34680372-34685963	9	chr16:20738967-20740566	chr16:20736967-20742566	1	5578	5591	5599	0.398827	0.363636	0.463889	0.398188
chr7:65957795-65958594	0	chr7:65955795-65960594	134	79	2	chr7:66109273-66110100	chr7:66107273-66112100	138	chr3:58487406-58488240	chr3:58485406-58490240	3	4799	4827	4834	1.09744	0.386598	1.61197	0.396498
chr11:134340964-134341537	0	chr11:134338964-134343537	93	19	0	chr11:133652494-133653066	chr11:133650494-133655066	22	chr14:132503778-132504346	chr14:132501778-132506346	1	4573	4572	4568	0.632511	0.392157	0.653452	0.42734
chr1:147806073-147807802	0	chr1:147804073-147809802	127	18	2	chr1_random:5765721-5768303	chr1_random:5763721-5770303	0	chr1:127434288-127435974	chr1:127432288-127437974	44	5729	6582	5686	0.507159	0.40107	0.368628	1.59224
chr9:66454664-66458674	0	chr9:66452664-66460674	173	27	5	N/A	N/A	N/A	N/A	N/A	N/A	8010	0	0	0.481794	0.418455	N/A	N/A
chr17:33568976-33570902	0	chr17:33566976-33572902	136	51	3	chr17:21928426-21930352	chr17:21926426-21932352	46	chr16:30525806-30527730	chr16:30523806-30529730	11	5926	5926	5924	0.809743	0.420918	0.732839	0.612038
chr4:6246915-6248356	0	chr4:6244915-6250356	82	35	0	chr4:6414346-6415788	chr4:6412346-6417788	41	chr5:2553137-2554535	chr5:2551137-2556535	0	5441	5442	5398	0.899591	0.422535	0.947677	0.419196
chr16:2954113-2955495	0	chr16:2952113-2957495	170	225	5	chr16:3019138-3021408	chr16:3017138-3023408	225	chr20:3035961-3037650	chr20:3033961-3039650	21	5382	6270	5689	2.15428	0.423913	2.37604	0.802182
chr3:197236551-197237230	0	chr3:197234551-197239230	1576	820	85	chr3:203175275-203176963	chr3:203173275-203178963	812	chr2:187899804-187900471	chr2:187897804-187902471	3	4679	5688	4667	1.00678	0.426345	1.14161	0.0465573
chr18:657329-658475	0	chr18:655329-660475	167	11	5	chr18:16141483-16142639	chr18:16139483-16144639	13	chr18:13442227-13443347	chr18:13440227-13445347	23	5146	5156	5120	0.358107	0.429515	0.369158	0.812853
chr1:2120974-2122551	0	chr1:2118974-2124551	324	298	14	chr1:2072653-2074221	chr1:2070653-2076221	316	N/A	N/A	N/A	5577	5568	0	1.65827	0.429688	1.6498	N/A
chr14:24422202-24423688	0	chr14:24420202-24425688	107	25	2	chr14:22891761-22893253	chr14:22889761-22895253	81	chr7:86841200-86842705	chr7:86839200-86844705	6	5486	5492	5505	0.649025	0.449102	1.24251	0.557176
chr1:10698070-10699198	0	chr1:10696070-10701198	89	30	1	chr1:10806441-10807570	chr1:10804441-10809570	25	chr1:13729888-13731171	chr1:13727888-13733171	1	5128	5129	5283	0.792379	0.45302	0.707887	0.45257
chr19:58399408-58400871	0	chr19:58397408-58402871	87	30	1	chr19:63757994-63759457	chr19:63755994-63761457	48	chr19:63679685-63681024	chr19:63677685-63683024	8	5463	5463	5339	0.80316	0.459184	1.00186	0.689007
chr16:2765167-2766117	0	chr16:2763167-2768117	69	76	0	chr16:2828412-2829018	chr16:2826412-2831018	60	chr20:2853929-2854874	chr20:2851929-2856874	0	4950	4606	4945	1.6054	0.465116	1.21969	0.464646
chr1:1405991-1407401	0	chr1:1403991-1409401	68	20	0	chr1:1389267-1392941	chr1:1387267-1394941	477	chr1:4575106-4575447	chr1:4573106-4577447	73	5410	7674	4341	0.771169	0.46875	10.276	2.87224
chr6:42145556-42146367	0	chr6:42143556-42148367	84	0	1	chr6:43151247-43152410	chr6:43149247-43154410	0	chr4:42041676-42042489	chr4:42039676-42044489	3	4811	5163	4813	0.416667	0.46875	0.447152	0.530523
chr8:1971128-1973029	0	chr8:1969128-1975029	162	27	6	chr8:1960592-1962564	chr8:1958592-1964564	34	chr8:1838281-1840078	chr8:1836281-1842078	44	5901	5972	5797	0.505667	0.472973	0.555333	1.32753
chr19:37803091-37804226	0	chr19:37801091-37806226	63	50	0	chr19:42788965-42790098	chr19:42786965-42792098	77	N/A	N/A	N/A	5135	5133	0	1.27459	0.487805	1.62538	N/A
chr11:132952384-132953860	0	chr11:132950384-132955860	77	238	1	chr11:132213316-132215036	chr11:132211316-132217036	178	chr14:131091413-131092579	chr14:131089413-131094579	5	5476	5720	5166	3.80033	0.492701	2.92504	0.600965
chr6:150246525-150247580	0	chr6:150244525-150249580	77	264	1	chr6:152591919-152592973	chr6:152589919-152594973	355	chr4:113358220-113359275	chr4:113356220-113361275	0	5055	5054	5055	4.16765	0.492701	5.14828	0.437956
chr1:155213110-155215072	0	chr1:155211110-155217072	107	48	3	N/A	N/A	N/A	N/A	N/A	N/A	5962	0	0	0.915588	0.494012	N/A	N/A
chr17:66097113-66098893	0	chr17:66095113-66100893	76	39	1	chr17:67431357-67433135	chr17:67429357-67435135	58	chr16:63420699-63422466	chr16:63418699-63424466	18	5780	5778	5767	0.996205	0.496324	1.21616	1.16049
chr9:91925112-91926002	0	chr9:91923112-91928002	121	50	4	chr9:88442920-88443799	chr9:88440920-88445799	80	chr15:97816577-97817469	chr15:97814577-97819469	11	4890	4879	4892	0.866156	0.497238	1.13255	0.663255
chr5:34838746-34839896	0	chr5:34836746-34841896	119	20	4	chr5:80890318-80891469	chr5:80888318-80893469	24	chr6:34603926-34605102	chr6:34601926-34607102	24	5150	5151	5176	0.551451	0.502793	0.579087	1.07192
chr1:17215261-17216368	0	chr1:17213261-17218368	74	1	1	chr1_random:6656684-6658687	chr1_random:6654684-6660687	0	chr1:19525151-19526238	chr1:19523151-19528238	4	5107	6003	5087	0.462205	0.503731	0.526319	0.608192
chr19:39997459-39998961	0	chr19:39995459-40000961	267	116	14	chr19:45097370-45099262	chr19:45095370-45101262	100	chr19:45856771-45858600	chr19:45854771-45860600	19	5502	5892	5829	0.87008	0.504587	0.791924	0.530158
chr14:81636002-81637092	0	chr14:81634002-81639092	57	5	0	chr14:81058221-81059311	chr14:81056221-81061311	6	N/A	N/A	N/A	5090	5090	0	0.595533	0.512821	0.606061	N/A
chr2:130737142-130737743	0	chr2:130735142-130739743	115	6	4	chr2b:130912116-130912711	chr2b:130910116-130914711	30	chr14:71917123-71917631	chr14:71915123-71919631	440	4601	4595	4508	0.409217	0.514286	0.653692	13.773
chr3:19187874-19189237	0	chr3:19185874-19191237	56	22	0	chr3:19575204-19576566	chr3:19573204-19578566	23	chr2:161439304-161440670	chr2:161437304-161442670	1	5363	5362	5366	0.884316	0.517241	0.877579	0.564579
chr3:2139259-2142710	1	chr3:2137259-2144710	141	65	6	chr3:2165580-2169038	chr3:2163580-2171038	78	chr2:58925241-58928724	chr2:58923241-58930724	14	7451	7458	7483	0.92441	0.522388	1.00501	0.68134
chr19:51016342-51018435	1	chr19:51014342-51020435	911	816	60	chr19:56187041-56189165	chr19:56185041-56191165	812	chr19:56720709-56722636	chr19:56718709-56724636	19	6093	6124	5927	1.68832	0.525232	1.5903	0.163932
chr1:16938928-16940575	0	chr1:16936928-16942575	53	19	0	chr1:16840878-16842524	chr1:16838878-16844524	18	chr1:126366470-126368112	chr1:126364470-126370112	11	5647	5646	5642	0.856409	0.530973	0.82045	1.06101
chr16:89322850-89324461	0	chr16:89320850-89326461	52	14	0	chr16:89662933-89664851	chr16:89660933-89666851	20	chr20:87366739-87368386	chr20:87364739-87370386	7	5611	5918	5647	0.77765	0.535714	0.907465	0.882248
chr1:147717689-147719569	1	chr1:147715689-147721569	93	97	3	chr1:111870840-111872718	chr1:111868840-111874718	86	N/A	N/A	N/A	5880	5878	0	1.61923	0.539216	1.41366	N/A
chr19:37288316-37289015	0	chr19:37286316-37291015	79	26	2	chr19:42285829-42286545	chr19:42283829-42288545	40	chr19:43284762-43285475	chr19:43282762-43287475	5	4699	4716	4713	0.793688	0.539568	0.958327	0.629732
chr1:148927707-148929986	0	chr1:148925707-148931986	51	0	0	chr2a:92104577-92106785	chr2a:92102577-92108785	10	chr14:1786960-1788587	chr14:1784960-1790587	0	6279	6208	5627	0.540541	0.540541	0.696376	0.484412
chr5:177433617-177434781	0	chr5:177431617-177436781	49	17	0	chr5:180408001-180409194	chr5:180406001-180411194	244	N/A	N/A	N/A	5164	5193	0	0.852323	0.550459	4.64647	N/A
chr9:96328949-96329848	0	chr9:96326949-96331848	1200	276	85	chr9:92791360-92792255	chr9:92789360-92794255	220	chr15:105328337-105329232	chr15:105326337-105331232	197	4899	4895	4895	0.471582	0.553571	0.364781	0.899698
chr7:64466352-64467242	0	chr7:64464352-64469242	85	75	3	chr7:64653049-64653939	chr7:64650918-64655939	104	chr3:60392815-60393703	chr3:60390815-60395703	30	4890	5021	4888	1.41491	0.568966	1.76389	1.54169
chr11:8008859-8009857	0	chr11:8006859-8011857	190	32	11	N/A	N/A	N/A	chr14:63965336-63966330	chr14:63963336-63968330	161	4998	0	4994	0.487742	0.57	N/A	3.74972
chr19:11959214-11960501	0	chr19:11957214-11962501	45	5	0	N/A	N/A	N/A	chr19:11679833-11681457	chr19:11677833-11683457	1	5287	0	5624	0.663594	0.571429	N/A	0.663111
chr11:34459964-34461560	0	chr11:34457964-34463560	70	8	2	chr11:34708211-34709807	chr11:34706211-34711807	11	chr14:37390237-37391852	chr14:37388237-37393852	10	5596	5596	5615	0.580645	0.576923	0.615385	0.884111
chr3:196358571-196360205	0	chr3:196356571-196362205	42	15	0	chr3:202273208-202274820	chr3:202271208-202276820	16	chr2:188807522-188809310	chr2:188805522-188811310	0	5634	5612	5788	0.872865	0.588235	0.87003	0.604314
chr3:75690181-75691303	0	chr3:75688181-75693303	42	25	0	chr3:77626241-77627363	chr3:77624241-77629363	19	chr15:15700585-15701070	chr15:15698585-15703070	0	5122	5122	4485	1.06262	0.588235	0.926916	0.515079
chr8:11871888-11872928	0	chr8:11869888-11874928	39	2	0	chr8:8034414-8066470	chr8:8032414-8068470	220	N/A	N/A	N/A	5040	36056	0	0.645161	0.606061	33.2407	N/A
chr15:23810468-23812100	0	chr15:23808468-23814100	187	107	12	chr15:21058685-21060317	chr15:21056685-21062317	108	chr7:2798715-2800347	chr7:2796715-2802347	16	5632	5632	5632	1.08136	0.607287	1.03791	0.596246
chr19:20606145-20607847	0	chr19:20604145-20609847	37	0	0	chr19:20594858-20596133	chr19:20592858-20598133	5	N/A	N/A	N/A	5702	5275	0	0.618557	0.618557	0.658938	N/A
chr8:2585082-2586208	0	chr8:2583082-2588208	37	0	0	chr8:2645183-2646309	chr8:2643183-2648309	0	chr8:2686280-2686500	chr8:2684280-2688500	1	5126	5126	4220	0.618557	0.618557	0.618557	0.555523
chr1:144520524-144521669	0	chr1:144518524-144523669	36	0	0	N/A	N/A	N/A	chr6:48210159-48211322	chr6:48208159-48214274	65	5145	0	6115	0.625	0.625	N/A	5.1323
chr7:64254705-64255617	0	chr7:64252705-64257617	36	0	0	chr7:64652918-64653861	chr7:64650918-64655939	104	chr3:60638311-60639216	chr3:60636311-60641216	2	4912	5021	4905	0.625	0.625	2.65227	0.737584
chr1:2130464-2131340	0	chr1:2128464-2133340	35	16	0	chr1:2082279-2083154	chr1:2080279-2085154	18	chr1:5259462-5260207	chr1:5257462-5262207	2	4876	4875	4745	0.957555	0.631579	0.975876	0.726358
chr7:5862154-5864193	0	chr7:5860154-5866193	35	52	0	chr7:5817308-5819368	chr7:5815308-5821368	77	N/A	N/A	N/A	6039	6060	0	1.691	0.631579	2.11258	N/A
chr9:469574-470812	0	chr9:467574-472812	34	18	0	chr9:461851-463319	chr9:459851-465319	19	chr15:76735356-76736497	chr15:76733356-76738497	0	5238	5468	5141	1.00892	0.638298	1.04997	0.626478
chr17:43660926-43663061	0	chr17:43658926-43665061	68	7	3	chr17_random:4563368-4565826	chr17_random:4561368-4567826	0	chr16:56920467-56922733	chr16:56918467-56937249	24	6135	6458	18782	0.574597	0.644531	0.493429	4.56608
chr10:45373906-45375483	0	chr10:45371906-45377483	33	2	0	chr10:45140750-45142320	chr10:45138750-45144320	1	chr9:45049568-45051158	chr9:45047568-45053158	1	5577	5570	5590	0.686785	0.645161	0.663877	0.705453
chr19:34849519-34850907	0	chr19:34847519-34852907	91	26	5	chr19:39835859-39837222	chr19:39833859-39839222	24	chr19:40919879-40921960	chr19:40917879-40923960	20	5388	5363	6081	0.730613	0.645695	0.683149	1.26384
chr10:109673547-109675634	1	chr10:109671547-109677634	43	27	1	chr10:108474762-108476861	chr10:108472762-108478861	34	chr9:107640752-107642871	chr9:107638752-107644871	19	6087	6099	6119	1.08988	0.65534	1.18503	1.59705
chr4:9153534-9155665	0	chr4:9151534-9157665	31	6	0	chr4_random:6599120-6601208	chr4_random:6597120-6603208	0	chr20:5275776-5277831	chr20:5273694-5279862	9	6131	6088	6168	0.786955	0.659341	0.654716	1.20604
chr21:45147711-45149651	0	chr21:45145711-45151651	154	211	11	chr21:43365515-43367560	chr21:43363515-43369560	232	chr3:2994458-2996439	chr3:2992458-2998439	28	5940	6045	5981	2.18872	0.665888	2.29129	1.00091
chr5:146762194-146763067	1	chr5:146760194-146765067	131	17	9	chr5:149309992-149310867	chr5:149307992-149312867	16	chr6:143839766-143840640	chr6:143837766-143842640	22	4873	4875	4874	0.486404	0.667539	0.466636	0.942602
chr16:89306926-89307511	0	chr16:89304926-89310582	41	43	1	chr16:89648102-89648656	chr16:89646102-89650656	9	N/A	N/A	N/A	5656	4554	0	1.41808	0.668317	0.608764	N/A
chr16:89307595-89308582	0	chr16:89304926-89310582	41	43	1	N/A	N/A	N/A	N/A	N/A	N/A	5656	0	0	1.41808	0.668317	N/A	N/A
chr20:3758085-3760312	0	chr20:3756085-3762312	375	124	31	chr20:3682541-3684772	chr20:3680541-3686772	117	chr10:37104683-37106595	chr10:37102683-37108595	41	6227	6231	5912	0.689655	0.672414	0.627362	0.619054
chr7:152621872-152623431	1	chr7:152619872-152625431	29	6	0	chr7:153497075-153498907	chr7:153495075-153500907	8	chr3:189887338-189888865	chr3:189885338-189890865	3	5559	5832	5527	0.804639	0.674157	0.878723	0.853079
chr6:3231075-3232949	0	chr6:3229075-3234949	128	48	9	chr6:3252013-3253887	chr6:3250013-3255887	50	chr4:3071257-3073191	chr4:3069257-3075191	29	5874	5874	5934	0.813315	0.678191	0.802708	1.1724
chr1:144533149-144534587	0	chr1:144531149-144536587	27	7	0	chr1:114624880-114626316	chr1:114622880-114628316	21	N/A	N/A	N/A	5438	5436	0	0.845384	0.689655	1.12811	N/A
chr3:75707196-75708317	0	chr3:75705196-75710317	37	2	1	chr3:77643627-77644749	chr3:77641627-77646749	2	chr5:182081855-182082937	chr5:182079855-182084937	1	5121	5122	5082	0.658464	0.695876	0.656173	0.66965
chr3:197354529-197355451	0	chr3:197352529-197357451	26	1	0	chr3:203295935-203296858	chr3:203293935-203298858	78	chr6:1284529-1285316	chr6:1282529-1287316	92	4922	4923	4787	0.72018	0.697674	2.3472	6.35359
chr22:18893084-18894860	0	chr22:18891084-18896860	409	58	36	chr22:17343558-17346149	chr22:17341558-17348149	323	chr10:62953348-62954984	chr10:62951348-62956984	60	5776	6591	5636	0.367288	0.703625	1.57485	0.805727
chr10:46951196-46952523	0	chr10:46949196-46954523	25	41	0	chr10:46675392-46677114	chr10:46673392-46679114	20	chr9:49447573-49448867	chr9:49445573-49450867	3	5327	5722	5294	1.63947	0.705882	1.21775	0.89283
chr5:783145-785979	0	chr5:781145-787979	35	21	1	N/A	N/A	N/A	chr6:446608-450853	chr6:444608-452853	58	6834	0	8245	1.05942	0.710526	N/A	4.77969
chr1:144593535-144594720	0	chr1:144591535-144596720	24	4	0	chr1:114552174-114554187	chr1:114550174-114556187	124	chr1:123953935-123955106	chr1:123951935-123957106	32	5185	6013	5171	0.806452	0.714286	3.94094	2.78467
chr11:1283060-1284038	0	chr11:1281060-1286038	24	14	0	chr11:1301363-1302281	chr11:1299363-1304281	11	N/A	N/A	N/A	4978	4918	0	1.03687	0.714286	0.940902	N/A
chr20:25833536-25835121	0	chr20:25831536-25837121	24	25	0	chr20_random:822358-823968	chr20_random:820358-825968	0	N/A	N/A	N/A	5585	5610	0	1.29032	0.714286	0.717483	N/A
chr15:98195790-98196486	1	chr15:98193790-98198486	23	4	0	chr15:95586784-95587442	chr15:95584784-95589442	4	chr7:77612918-77613544	chr7:77610918-77615544	0	4696	4658	4626	0.816168	0.722892	0.803956	0.712116
chr17:62914806-62916214	0	chr17:62912806-62918214	23	1	0	N/A	N/A	N/A	chr16:56920467-56935249	chr16:56918467-56937249	24	5408	0	18782	0.746211	0.722892	N/A	7.98829
chr20:19737894-19740064	0	chr20:19735894-19742064	23	6	0	chr20:19976174-19978978	chr20:19974174-19980978	6	chr10:53056815-53059025	chr10:53054815-53061025	1	6170	6804	6210	0.862806	0.722892	0.942113	0.793722
chr3:75833786-75834829	0	chr3:75831786-75836829	23	2	0	chr3:77778364-77779408	chr3:77776364-77781408	42	N/A	N/A	N/A	5043	5044	0	0.76953	0.722892	1.64326	N/A
chr21:44393676-44394568	0	chr21:44391676-44396568	43	63	2	chr21:42661616-42662515	chr21:42659616-42664515	63	N/A	N/A	N/A	4892	4899	0	1.76636	0.728155	1.69704	N/A
chr10:81741186-81742582	1	chr10:81739186-81744582	22	11	0	N/A	N/A	N/A	N/A	N/A	N/A	5396	0	0	0.991345	0.731707	N/A	N/A
chr19:11784427-11785561	0	chr19:11782427-11787561	22	76	0	chr19:11986327-11987460	chr19:11984327-11989460	79	chr19:11491839-11493104	chr19:11489839-11495104	2	5134	5133	5265	2.52557	0.731707	2.48289	0.88681
chr3:182833652-182834663	0	chr3:182831652-182836663	22	3	0	chr3:188599850-188600795	chr3:188597850-188602795	3	N/A	N/A	N/A	5011	4945	0	0.802518	0.731707	0.787713	N/A
chr5:178003380-178004698	0	chr5:178001380-178006698	31	4	1	chr5:181010810-181012109	chr5:181008810-181014109	5	chr6:175161071-175161210	chr6:175159071-175163210	2	5318	5299	4139	0.744417	0.741758	0.756528	0.606468
chr1:143742993-143744661	0	chr1:143740993-143746661	20	0	0	chr1:114658071-114659740	chr1:114656071-114661740	500	chr6:48210613-48212274	chr6:48208159-48214274	65	5668	5669	6115	0.75	0.75	12.1158	5.59048
chr16:22448157-22449013	0	chr16:22446157-22451013	20	6	0	N/A	N/A	N/A	chr20:17908441-17909408	chr20:17906441-17911408	13	4856	0	4967	0.895161	0.75	N/A	1.67377
chr18:74798856-74800151	1	chr18:74796856-74802151	20	14	0	chr18:74013772-74015063	chr18:74011772-74017063	15	chr18:70541112-70542519	chr18:70539112-70544519	2	5295	5291	5407	1.08871	0.75	1.09008	0.905112
chr22:22651505-22653051	0	chr22:22649505-22655051	20	3	0	N/A	N/A	N/A	chr14:1786960-1787387	chr14:1784960-1790587	0	5546	0	5627	0.822581	0.75	N/A	0.760954
chr3:38035177-38036388	0	chr3:38033177-38038388	29	38	1	chr3:38859511-38860714	chr3:38857511-38862714	37	chr2:98548387-98549604	chr2:98546387-98551604	1	5211	5203	5217	1.50054	0.758427	1.42784	0.736291
chr9:45355882-45356483	0	chr9:45353882-45359353	19	7	0	chr9_random:3594338-3594940	chr9_random:3592338-3597852	0	chr15:108812609-108813126	chr15:108810609-108815487	196	5471	5514	4878	0.930992	0.759494	0.765463	12.7432
chr9:45356689-45357353	0	chr9:45353882-45359353	19	7	0	chr9_random:3595179-3595852	chr9_random:3592338-3597852	0	N/A	N/A	N/A	5471	5514	0	0.930992	0.759494	0.765463	N/A
chr19:56879170-56880598	0	chr19:56877170-56882598	78	15	6	chr19:62213323-62214759	chr19:62211323-62216759	17	chr19:62355190-62356595	chr19:62353190-62358595	38	5428	5436	5405	0.645161	0.76087	0.659732	1.92855
chr22:51222217-51222772	0	chr22:51220217-51224772	97	24	8	chr22:50142601-50143156	chr22:50140601-50145156	69	chr10:94811662-94812217	chr10:94809662-94814217	364	4555	4555	4555	0.678036	0.764331	1.18124	13.0284
chr19:44711603-44712250	0	chr19:44709603-44714250	38	17	2	chr19:49797720-49798054	chr19:49795720-49800054	22	chr19:50637855-50638503	chr19:50635855-50640503	5	4647	4334	4648	0.947992	0.765306	0.951678	0.89073
chr20:60328476-60330173	0	chr20:60326476-60332173	38	4	2	chr20:59536550-59538260	chr20:59534550-59540260	4	N/A	N/A	N/A	5697	5710	0	0.691244	0.765306	0.688023	N/A
chr12:8542602-8543281	0	chr12:8540602-8545281	18	4	0	chr12:8709300-8709934	chr12:8707300-8711934	1	N/A	N/A	N/A	4679	4634	0	0.868486	0.769231	0.784919	N/A
chr13:31377152-31378145	0	chr13:31375152-31380145	18	2	0	chr13:30532475-30533468	chr13:30530475-30535468	2	chr17:10232217-10233213	chr17:10230217-10235213	0	4993	4993	4996	0.818859	0.769231	0.815851	0.769693
chr16:56696313-56697421	0	chr16:56694313-56699421	18	2	0	chr16:56089504-56090610	chr16:56087504-56092610	2	chr20:55022681-55023761	chr20:55020681-55025761	0	5108	5106	5080	0.818859	0.769231	0.815531	0.765014
chr17:16487512-16488202	0	chr17:16485512-16490202	18	8	0	chr17_random:2599540-2600230	chr17_random:2597540-2602230	0	chr16:15865646-15866331	chr16:15863646-15868331	1	4690	4690	4685	0.967742	0.769231	0.769231	0.838266
chr5:150050969-150052319	0	chr5:150048969-150054319	18	3	0	chr5:152647754-152650034	chr5:152645754-152652034	2	chr6:147145606-147146922	chr6:147143606-147148922	1	5350	6280	5316	0.843672	0.769231	0.957672	0.833828
chr7:128170213-128172673	0	chr7:128168213-128174673	96	1	8	N/A	N/A	N/A	chr16:57980680-57983059	chr16:57978680-57985059	95	6460	0	6379	0.397022	0.769231	N/A	3.65982
chr1:17019372-17020769	0	chr1:17017372-17022769	17	3	0	chr1_random:6507201-6508581	chr1_random:6505201-6510581	0	chr1:9471563-9472925	chr1:9469563-9474925	0	5397	5380	5362	0.854629	0.779221	0.776766	0.774167
chr15:23207695-23208881	0	chr15:23205695-23210881	17	4	0	chr15:20767724-20768910	chr15:20765724-20770910	8	chr7:63719927-63721042	chr7:63717927-63723042	38	5186	5186	5115	0.879765	0.779221	0.968123	3.42355
chr16:21512663-21514196	0	chr16:21510663-21516196	17	0	0	N/A	N/A	N/A	N/A	N/A	N/A	5533	0	0	0.779221	0.779221	N/A	N/A
chr17:20811493-20812539	0	chr17:20809493-20814539	17	0	0	N/A	N/A	N/A	chr16:20103114-20104149	chr16:20101114-20106149	1	5046	0	5035	0.779221	0.779221	N/A	0.848206
chr2:91846870-91848575	0	chr2:91844870-91850575	17	0	0	chr2a:92105116-92106785	chr2a:92102577-92108785	10	chr14:1786960-1788049	chr14:1784960-1790587	0	5705	6208	5627	0.779221	0.779221	1.10487	0.768567
chr1:17230337-17231803	0	chr1:17228337-17233803	16	13	0	chr1_random:6696128-6698380	chr1_random:6694128-6700380	0	chr1:127873015-127874399	chr1:127871015-127876399	0	5466	6252	5384	1.12054	0.789474	0.902998	0.77763
chr22:47549964-47551310	1	chr22:47547964-47553310	16	14	0	chr22:46365191-46366539	chr22:46363191-46368539	9	chr10:91177400-91178762	chr10:91175400-91180762	1	5346	5348	5362	1.14601	0.789474	1.00516	0.863822
chr3:125485190-125486539	0	chr3:125483190-125488539	16	0	0	chr3:130153235-130154596	chr3:130151235-130156596	5	N/A	N/A	N/A	5349	5361	0	0.789474	0.789474	0.91113	N/A
chr8:22925485-22926989	0	chr8:22923485-22928989	16	4	0	chr8:19419285-19420781	chr8:19417285-19422781	5	chr8:23030514-23032018	chr8:23028514-23034018	0	5504	5496	5504	0.891341	0.789474	0.90777	0.789474
chr9:706725-707556	0	chr9:704725-709556	16	84	0	chr9_random:7066683-7067429	chr9_random:7064683-7069429	0	chr15:76493382-76494126	chr15:76491382-76496126	4	4831	4746	4744	2.92869	0.789474	0.775583	1.05717
chr1:145037767-145040692	1	chr1:145035767-145042692	526	687	54	chr1:114291459-114294403	chr1:114289459-114296403	449	chr1:123151902-123154830	chr1:123149902-123156830	55	6925	6944	6928	2.37146	0.793515	1.4996	0.614601
chr2:98205576-98206416	0	chr2:98203576-98208416	15	5	0	chr2a:98081943-98082783	chr2a:98079943-98084783	21	chr13:112778463-112779343	chr13:112775770-112781343	0	4840	4840	5573	0.929032	0.8	1.30909	0.921157
chr6:167764262-167765082	0	chr6:167762262-167767082	15	3	0	chr6:170467743-170468888	chr6:170465743-170470888	4	chr4:164386958-164387766	chr4:164384958-164389766	3	4820	5145	4808	0.877419	0.8	0.95745	1.01565
chr1:148555814-148557118	0	chr1:148553814-148559118	43	4	3	chrUn:9056378-9057690	chrUn:9054378-9059690	0	chr1:126366753-126368066	chr1:126364470-126370112	11	5304	5312	5642	0.657689	0.800971	0.583403	1.23929
chr15:33009548-33012062	0	chr15:33007548-33014062	24	2	1	chr15:29500912-29503426	chr15:29498912-29505426	2	chr7:10941363-10943841	chr7:10939363-10945841	1	6514	6514	6478	0.760369	0.803571	0.757576	0.774914
chr19:36347334-36348469	0	chr19:36345334-36350469	24	1	1	chr19:41368570-41369899	chr19:41366570-41371899	2	chr19:42336726-42337868	chr19:42334726-42339868	2	5135	5329	5142	0.737327	0.803571	0.786197	0.845307
chr16:89313131-89314438	0	chr16:89311131-89316438	33	12	2	N/A	N/A	N/A	N/A	N/A	N/A	5307	0	0	0.894901	0.806452	N/A	N/A
chr5:37378878-37379916	0	chr5:37376878-37381916	33	1	2	chr5:78280353-78281386	chr5:78278353-78283386	3	chr6:37214632-37215670	chr6:37212632-37217670	17	5038	5033	5038	0.665973	0.806452	0.703114	1.64223
chr15:76029924-76031936	0	chr15:76027924-76033936	70	87	6	N/A	N/A	N/A	N/A	N/A	N/A	6012	0	0	1.75682	0.807692	N/A	N/A
chr6:32222313-32223703	0	chr6:32220313-32225703	14	3	0	chr6:32792027-32794329	chr6:32790027-32796329	3	chr4:31895497-31897170	chr4:31893497-31899170	1	5390	6302	5673	0.889276	0.810811	1.03418	0.930962
chr2:2616872-2617947	0	chr2:2614872-2619947	23	3	1	chr2a:2577558-2578626	chr2a:2575558-2580626	3	chr13:2533605-2534661	chr13:2531605-2536661	2	5075	5068	5056	0.792849	0.813253	0.787521	0.851128
chr19:488237-490057	0	chr19:486237-492057	59	74	5	chr19:408976-410134	chr19:406976-412134	54	N/A	N/A	N/A	5820	5158	0	1.70778	0.819328	1.17806	N/A
chr2:3698987-3699999	0	chr2:3696987-3701999	13	2	0	chr2a:3190929-3191995	chr2a:3188929-3193995	3	chr13:3154387-3155400	chr13:3152387-3157400	0	5012	5066	5013	0.874945	0.821918	0.906298	0.822082
chr1:121260498-121261869	0	chr1:121258498-121263869	22	0	1	chr5:65575212-65576571	chr5:65573212-65578571	14	chr6:47963774-47965187	chr6:47961774-47967187	5	5371	5359	5413	0.731707	0.823171	1.0398	1.07262
chr20:1782961-1784819	1	chr20:1780961-1786819	449	118	48	chr20:1685822-1687887	chr20:1683822-1689887	127	chr10:35115269-35117238	chr10:35113269-35119238	111	5858	6065	5969	0.566576	0.825147	0.591726	1.33215
chr12:126675167-126677174	0	chr12:126673167-126679174	12	5	0	chr12:128118559-128120573	chr12:128116559-128122573	5	chr11:127515018-127516998	chr11:127513018-127518998	2	6007	6014	5980	0.967742	0.833333	0.960714	0.980422
chr14:103673224-103674362	0	chr14:103671224-103676362	12	3	0	chr14:103678945-103680257	chr14:103676945-103682257	3	N/A	N/A	N/A	5138	5312	0	0.913978	0.833333	0.939878	N/A
chr3:10051983-10053396	0	chr3:10049983-10055396	12	5	0	chr3:13208544-13209875	chr3:13206544-13211875	0	chr2:50942242-50943512	chr2:50940242-50945512	2	5413	5331	5270	0.967742	0.833333	0.820709	0.958831
chr4:120375273-120375867	0	chr4:120373273-120377867	12	0	0	chr4:122791593-122792162	chr4:122789593-122794162	62	chr3:70407001-70407518	chr3:70405001-70409584	0	4594	4569	4583	0.833333	0.833333	2.38593	0.831338
chr12:34174757-34176053	0	chr12:34172757-34178053	11	4	0	chr12:54770787-54772086	chr12:54768787-54774086	7	chr11:34237546-34238844	chr11:34235546-34240844	5	5296	5299	5298	0.954112	0.84507	1.02491	1.22966
chr13:112547154-112548911	0	chr13:112545154-112550911	11	6	0	chr13:113344347-113346119	chr13:113342347-113348119	6	chr17:92136741-92138575	chr17:92134741-92140575	0	5757	5772	5834	1.00863	0.84507	1.00132	0.856373
chr3:87137732-87139247	1	chr3:87135732-87141247	11	1	0	chr3:89383970-89385477	chr3:89381970-89387477	2	chr2:11337010-11338500	chr2:11335010-11340500	0	5515	5507	5490	0.872331	0.84507	0.894987	0.84124
chr6:28615969-28617004	0	chr6:28613969-28619004	11	2	0	chr6:29161813-29162848	chr6:29159813-29164848	2	N/A	N/A	N/A	5035	5035	0	0.899591	0.84507	0.896287	N/A
chr7:63360182-63362257	0	chr7:63358182-63364257	11	10	0	chr7:63578249-63580326	chr7:63576249-63582326	11	N/A	N/A	N/A	6075	6077	0	1.11767	0.84507	1.12713	N/A
chr20:361213-363225	1	chr20:359213-365225	19	8	1	N/A	N/A	N/A	chr10:33629533-33631314	chr10:33627533-33633314	0	6012	0	5781	0.955492	0.85443	N/A	0.730312
chr11:49579664-49580595	0	chr11:49577664-49586242	10	0	0	chr11:87744169-87745101	chr11:87738537-87747101	10	chr14:87267754-87268451	chr14:87262435-87270451	24	8578	8564	8016	0.857143	0.857143	1.11506	2.54859
chr11:49582211-49584242	0	chr11:49577664-49586242	10	0	0	chr11:87740537-87742568	chr11:87738537-87747101	10	chr14:87264435-87266461	chr14:87262435-87270451	24	8578	8564	8016	0.857143	0.857143	1.11506	2.54859
chr2:131185182-131185760	0	chr2:131183182-131187760	10	0	0	chr2b:131353508-131354118	chr2b:131351508-131356118	0	N/A	N/A	N/A	4578	4610	0	0.857143	0.857143	0.863134	N/A
chr6:27792131-27793047	0	chr6:27790131-27795047	10	18	0	chr6:28340463-28341366	chr6:28338463-28343366	28	chr4:27602448-27603330	chr4:27600448-27605330	3	4916	4903	4882	1.35484	0.857143	1.58023	1.08336
chr8:117950144-117951144	0	chr8:117948144-117953144	10	4	0	chr8:116319101-116320099	chr8:116317101-116322099	4	chr8:119450069-119451129	chr8:119448069-119453129	1	5000	4998	5060	0.967742	0.857143	0.960655	0.946286
chr17:7919095-7920287	0	chr17:7917095-7922287	71	1	7	chr17:8210829-8212021	chr17:8208829-8214021	1	chr16:7767026-7768218	chr16:7765026-7770218	16	5192	5192	5192	0.47279	0.858779	0.471895	1.12422
chr10:106034417-106035635	0	chr10:106032417-106037635	62	13	6	chr10:104733765-104734983	chr10:104731765-104736983	13	chr9:103979143-103980359	chr9:103977143-103982359	13	5218	5218	5216	0.698043	0.860656	0.685544	1.07261
chr17:78233484-78234331	0	chr17:78231484-78236331	27	5	2	chr17:80420137-80420967	chr17:80418137-80422967	5	chr16:75722613-75723442	chr16:75720613-75725442	8	4847	4830	4829	0.80089	0.862069	0.791363	1.1868
chr17:259989-261371	0	chr17:257989-263371	131	59	14	chr17:372175-372833	chr17:370175-374833	32	chr16:265005-266341	chr16:263005-268341	11	5382	4658	5336	0.912008	0.863874	0.535517	0.622902
chr17:45400736-45402134	0	chr17:45398736-45404134	18	0	1	chr17:10347642-10349037	chr17:10345642-10351037	0	chr16:57398496-57399887	chr16:57396496-57401887	3	5398	5395	5391	0.769231	0.865385	0.768803	0.977751
chr3:42977512-42978553	0	chr3:42975512-42980553	18	10	1	chr3:43901572-43902598	chr3:43899572-43904598	9	chr2:93643526-93644611	chr2:93641526-93646611	1	5041	5026	5085	1.01737	0.865385	0.976108	0.846485
chr1:1623729-1624459	0	chr1:1621729-1626459	9	5	0	chr1:1619108-1619854	chr1:1617108-1621854	77	chr1:4768668-4769697	chr1:4766668-4771697	24	4730	4746	5029	1.00982	0.869565	2.90836	2.9417
chr13:114461592-114462706	0	chr13:114459592-114464706	9	3	0	chr13:115482625-115483678	chr13:115480625-115485678	1	chr17:93894242-93895277	chr17:93892242-93897277	0	5114	5053	5035	0.953717	0.869565	0.885229	0.856132
chr19:22033899-22034985	0	chr19:22031899-22036985	9	2	0	chr19:22134707-22135804	chr19:22132707-22137804	5	chr19:21053747-21054853	chr19:21051747-21056853	1	5086	5097	5106	0.925666	0.869565	1.00348	0.952347
chr5:180610881-180611525	0	chr5:180608881-180613525	9	3	0	chr5:183679158-183679800	chr5:183677158-183681800	3	N/A	N/A	N/A	4644	4642	0	0.953717	0.869565	0.948208	N/A
chr1:3341263-3341808	0	chr1:3339263-3343808	69	28	7	chr1:3252558-3253087	chr1:3250558-3255087	30	chr1:6382375-6382915	chr1:6380375-6384915	11	4545	4529	4540	0.885221	0.872093	0.884823	0.929209
chr1:121137637-121139155	0	chr1:121135637-121141155	8	0	0	N/A	N/A	N/A	chr16:22634860-22635239	chr16:22632860-22644674	16	5518	0	11814	0.882353	0.882353	N/A	4.63691
chr1:148176130-148176890	0	chr1:148174130-148178890	8	0	0	N/A	N/A	N/A	N/A	N/A	N/A	4760	0	0	0.882353	0.882353	N/A	N/A
chr1:713142-714846	0	chr1:711142-716846	8	0	0	N/A	N/A	N/A	N/A	N/A	N/A	5704	0	0	0.882353	0.882353	N/A	N/A
chr10:830323-831311	1	chr10:828323-833311	8	168	0	N/A	N/A	N/A	chr9:963853-964203	chr9:961853-966203	1	4988	0	4350	5.66414	0.882353	N/A	0.839448
chr16:204242-205062	0	chr16:202242-207062	8	8	0	chr16:148002-148822	chr16:146002-150822	7	chr20:113084-113896	chr20:111084-115896	0	4820	4820	4812	1.11006	0.882353	1.06952	0.880888
chr16:21529189-21530193	0	chr16:21527189-21532193	8	11	0	chr16:21761879-21762881	chr16:21759879-21764881	82	chr20:86018045-86018920	chr20:86016045-86020920	58	5004	5002	4875	1.19545	0.882353	3.07364	5.39208
chr16:30345737-30347187	0	chr16:30343737-30349187	8	4	0	chr16:30706711-30708189	chr16:30704711-30710189	11	N/A	N/A	N/A	5450	5478	0	0.996205	0.882353	1.18251	N/A
chr18:14178495-14179812	0	chr18:14176495-14181812	8	1	0	chr21:14073118-14074431	chr21:14071118-14076431	1	chr10:60986211-60989240	chr10:60984211-60991240	23	5317	5313	7029	0.910816	0.882353	0.908407	3.60542
chr19:24097407-24098297	0	chr19:24095407-24100297	8	10	0	chr19:24145732-24146621	chr19:24143732-24148621	10	chr19:22935370-22936281	chr19:22933370-22938281	2	4890	4889	4911	1.16698	0.882353	1.1495	1.04726
chr3:125633946-125636065	0	chr3:125631946-125638065	8	8	0	N/A	N/A	N/A	chr20:5275826-5277862	chr20:5273694-5279862	9	6119	0	6168	1.11006	0.882353	N/A	1.61712
chr8:11759684-11760636	0	chr8:11757684-11762636	8	0	0	chr8_random:7183415-7184366	chr8_random:7181415-7186366	0	chr8:8829749-8830724	chr8:8827749-8832724	1	4952	4951	4975	0.882353	0.882353	0.882175	0.967038
chr15:31507532-31509308	0	chr15:31505532-31511308	161	56	18	chr15_random:1997474-1999590	chr15_random:1995474-2001590	0	chr7:9532847-9534487	chr7:9530847-9536487	47	5776	6116	5640	0.761933	0.882353	0.287474	1.3978
chr1:109203486-109204494	0	chr1:109201486-109206494	84	8	9	chr1:110207015-110207941	chr1:110205015-110209941	8	chr1:111660093-111661035	chr1:111658093-111663035	25	5008	4926	4942	0.524194	0.885417	0.5092	1.34567
chr19:17558537-17559684	1	chr19:17556537-17561684	33	16	3	N/A	N/A	N/A	chr19:17008364-17009507	chr19:17006364-17011507	3	5147	0	5143	0.978148	0.887097	N/A	0.820476
chr8:53851626-53854482	0	chr8:53849626-53856482	58	65	6	chr8:51009414-51012611	chr8:51007414-51014611	62	chr8:55519530-55522546	chr8:55517530-55524546	8	6856	7197	7016	1.57463	0.889831	1.5366	0.898771
chr1:120924826-120925726	0	chr1:120922826-120927726	7	0	0	chr1:128811536-128812433	chr1:128809128-128814799	52	chr1:128166381-128167318	chr1:128163978-128169682	20	4900	5671	5704	0.895522	0.895522	2.66959	2.93785
chr11:67572302-67574212	0	chr11:67570302-67576212	7	2	0	N/A	N/A	N/A	chr20:5275942-5277777	chr20:5273694-5279862	9	5910	0	6168	0.953298	0.895522	N/A	1.6993
chr15:100466143-100466732	0	chr15:100464143-100468732	7	1	0	chr15:97952350-97952839	chr15:97950350-97954839	1	chr7:80090196-80090678	chr7:80088196-80092678	0	4589	4489	4482	0.92441	0.895522	0.902554	0.874642
chr16:5147292-5148400	0	chr16:5145292-5150400	7	2	0	chr16:5254643-5256132	chr16:5252643-5258132	23	chr20:5275976-5276994	chr20:5273694-5279862	9	5108	5489	6168	0.953298	0.895522	1.63303	1.96611
chr7:76178370-76179593	0	chr7:76176370-76181593	7	1	0	chr7:75951336-75952559	chr7:75949336-75954559	17	chr3:44983539-44984745	chr3:44981236-44986750	42	5223	5223	5514	0.92441	0.895522	1.35685	4.55519
chr6:150262331-150264094	0	chr6:150260331-150266094	23	89	2	chr6:152711099-152712831	chr6:152709099-152714831	121	chr4:113185285-113186970	chr4:113183285-113188970	0	5763	5732	5685	2.79829	0.903614	3.35535	0.713108
chr1:149764074-149765747	0	chr1:149762074-149767747	6	0	0	chr1:128811128-128812799	chr1:128809128-128814799	52	chr1:128165978-128167682	chr1:128163978-128169682	20	5673	5671	5704	0.909091	0.909091	2.34077	2.57598
chr11:3180709-3182957	0	chr11:3178709-3184957	6	9	0	chr11:3207622-3209861	chr11:3205622-3211861	9	chr14:3169032-3171198	chr14:3167032-3173198	0	6248	6239	6166	1.17302	0.909091	1.15536	0.89716
chr13:111526554-111527219	0	chr13:111524554-111529219	6	2	0	chr13:111957018-111957686	chr13:111955018-111959686	2	chr17:90921873-90922450	chr17:90919873-90924450	1	4665	4668	4577	0.967742	0.909091	0.964807	0.973028
chr17:18684015-18685071	0	chr17:18682015-18687071	6	1	0	chr17:40727980-40729111	chr17:40725980-40731111	1	chr16:15295025-15296133	chr16:15293025-15298133	50	5056	5131	5108	0.938416	0.909091	0.950533	5.09317
chr18:596926-597593	0	chr18:594926-599593	6	0	0	chr18:16205408-16205991	chr18:16203408-16207991	0	chr18:13507896-13508510	chr18:13505896-13510510	0	4667	4583	4614	0.909091	0.909091	0.892728	0.898767
chr19:23257684-23258700	0	chr19:23255684-23260700	6	3	0	chr19:23284887-23286379	chr19:23282887-23288379	2	chr19:22463205-22463751	chr19:22461205-22465751	0	5016	5492	4546	0.997067	0.909091	1.05569	0.823909
chr2:132767159-132768070	0	chr2:132765159-132770070	6	0	0	chrUn:5315148-5317693	chrUn:5313148-5319693	0	N/A	N/A	N/A	4911	6545	0	0.909091	0.909091	1.21157	N/A
chr3:75667731-75669317	0	chr3:75665731-75671317	6	1	0	chr3:77579746-77581326	chr3:77577746-77583326	6	chr14:6733096-6734681	chr14:6731096-6736681	12	5586	5580	5585	0.938416	0.909091	1.07323	1.90049
chr4:3956420-3958460	0	chr4:3954420-3960460	6	0	0	N/A	N/A	N/A	chr20:5275694-5277704	chr20:5273694-5279862	9	6040	0	6168	0.909091	0.909091	N/A	1.68792
chr7:42896022-42897157	0	chr7:42894022-42899157	6	0	0	chr7:41355623-41356762	chr7:41353623-41358762	1	chr3:83413726-83414852	chr3:83411726-83416852	0	5135	5139	5126	0.909091	0.909091	0.937369	0.907498
chr7:75114577-75115945	0	chr7:75112577-75117945	6	6	0	chr7:74863026-74864502	chr7:74861026-74866502	48	chr3:43039243-43040690	chr3:43037243-43042690	8	5368	5476	5447	1.08504	0.909091	2.2763	1.59336
chr9:133884074-133884994	0	chr9:133882074-133886994	6	8	0	chr9:131010781-131011701	chr9:131008781-131013701	6	chr15:7783115-7784047	chr15:7781115-7786047	1	4920	4920	4932	1.1437	0.909091	1.07438	0.994154
chr13:53173717-53174957	0	chr13:53171717-53176957	14	1	1	chr13:52443708-52444947	chr13:52441708-52446947	2	chr17:31477866-31479087	chr17:31475866-31481087	1	5240	5239	5221	0.836966	0.912162	0.859787	0.881314
chr7:6768838-6770326	0	chr7:6766838-6772326	14	61	1	chr7:6747738-6749219	chr7:6745738-6751219	233	chr3:44983236-44984750	chr3:44981236-44986750	42	5488	5481	5514	2.40628	0.912162	6.52729	3.92514
chr1:165567105-165568110	0	chr1:165565105-165570110	5	5	0	chr1:144912913-144913914	chr1:144910913-144915914	5	chr1:195431514-195432529	chr1:195429514-195434529	0	5005	5001	5015	1.07196	0.923077	1.06209	0.924921
chr11:71524359-71524986	0	chr11:71522359-71526986	5	1	0	chr11:70109466-70110095	chr11:70107466-70112095	10	chr8:8695438-8695665	chr8:8693438-8697665	10	4627	4629	4227	0.952854	0.923077	1.20332	1.60989
chr12:126467306-126469155	0	chr12:126465306-126471155	5	9	0	chr12:127907640-127909469	chr12:127905640-127911469	8	chr11:127300773-127302935	chr11:127298773-127304935	0	5849	5829	6162	1.19107	0.923077	1.14293	0.972474
chr13:21900122-21901019	0	chr13:21898122-21903019	5	14	0	chr13:20862612-20863515	chr13:20860612-20865515	13	chr4:5766848-5767789	chr4:5764848-5769789	0	4897	4903	4941	1.33995	0.923077	1.28829	0.931371
chr17:45330845-45332195	0	chr17:45328845-45334195	5	2	0	chr17:10419719-10421074	chr17:10417719-10423074	2	chr16:57329703-57331179	chr16:57327703-57333179	1	5350	5355	5476	0.98263	0.923077	0.979936	1.03071
chr19:37498372-37499285	0	chr19:37496372-37501285	5	2	0	chr19:42070100-42071016	chr19:42068100-42073016	2	chr19:34332446-34332861	chr19:34330446-34334861	0	4913	4916	4415	0.98263	0.923077	0.979619	0.82951
chr2:132794814-132796565	1	chr2:132792814-132798565	5	0	0	N/A	N/A	N/A	chr16:22634862-22642674	chr16:22632860-22644674	16	5751	0	11814	0.923077	0.923077	N/A	4.65439
chr2:224701381-224702876	0	chr2:224699381-224704876	5	1	0	chr2b:229847019-229848490	chr2b:229845019-229850490	1	chr12:87710487-87711992	chr12:87708487-87713992	0	5495	5471	5505	0.952854	0.923077	0.946895	0.924757
chr2:47595969-47597309	0	chr2:47593969-47599309	5	4	0	chr2a:48505840-48507218	chr2a:48503840-48509218	2	N/A	N/A	N/A	5340	5378	0	1.04218	0.923077	0.985988	N/A
chr7:65878138-65879265	0	chr7:65876138-65881265	5	8	0	chr7:66028579-66029741	chr7:66026579-66031741	10	chr3:58179799-58180967	chr3:58177799-58182967	58	5127	5162	5168	1.16129	0.923077	1.21101	5.83651
chr4:87825192-87825736	0	chr4:87823192-87827736	13	4	1	chr4:89813748-89814290	chr4:89811748-89816290	6	N/A	N/A	N/A	4544	4542	0	0.927972	0.924658	0.97093	N/A
chr1:16969975-16971839	0	chr1:16967975-16973839	61	1	7	chr3:50865785-50867672	chr3:50863785-50869672	111	chr2:86730468-86732342	chr2:86728468-86734342	88	5864	5887	5874	0.511864	0.929752	2.17227	4.47042
chr10:18916371-18917041	0	chr10:18914371-18919041	4	2	0	chr10:19293184-19293854	chr10:19291184-19295854	0	N/A	N/A	N/A	4670	4670	0	0.997984	0.9375	0.9375	N/A
chr10:38691074-38691902	0	chr10:38689074-38694670	4	1	0	chr10:39280165-39281009	chr10:39278165-39283727	10	N/A	N/A	N/A	5596	5562	0	0.967742	0.9375	1.21417	N/A
chr10:38691905-38692670	0	chr10:38689074-38694670	4	1	0	chr10:39281012-39281727	chr10:39278165-39283727	10	chr3:70407118-70407584	chr3:70405001-70409584	0	5596	5562	4583	0.967742	0.9375	1.21417	0.767792
chr12:32551840-32553523	0	chr12:32549840-32555523	4	1	0	chr12:56446123-56447795	chr12:56444123-56449795	1	chr11:32473352-32475001	chr11:32471352-32477001	1	5683	5672	5649	0.967742	0.9375	0.964039	1.01661
chr12:8548576-8549502	0	chr12:8546576-8551502	4	3	0	chr12:8715760-8716687	chr12:8713760-8718687	1	N/A	N/A	N/A	4926	4927	0	1.02823	0.9375	0.966105	N/A
chr13:25591951-25593292	0	chr13:25589951-25595292	4	3	0	chr13:24615510-24616842	chr13:24613510-24618842	14	chr13:112777770-112778847	chr13:112775770-112781343	0	5341	5332	5573	1.02823	0.9375	1.33298	0.978223
chr16:3208226-3208936	0	chr16:3206226-3210936	4	2	0	chr16:3279975-3280685	chr16:3277975-3282685	3	chr20:3298308-3299013	chr20:3296308-3301013	2	4710	4710	4705	0.997984	0.9375	1.02273	1.10678
chr17:43567167-43568934	0	chr17:43565167-43570934	4	2	0	chr17:12011398-12013442	chr17:12009398-12015442	13	chr16:55590658-55592298	chr16:55588658-55594298	2	5767	6044	5640	0.997984	0.9375	1.36959	1.08356
chr17:62832411-62834101	0	chr17:62830411-62836101	4	0	0	N/A	N/A	N/A	chr16:55590747-55592298	chr16:55588658-55594298	2	5690	0	5640	0.9375	0.9375	N/A	1.09822
chr18:14430949-14431593	0	chr18:14428949-14433593	4	1	0	chr18:2012770-2013417	chr18:2010770-2015417	1	chr10:73741980-73742662	chr10:73739980-73744662	9	4644	4647	4682	0.967742	0.9375	0.966533	1.71849
chr19:23299434-23300415	0	chr19:23297434-23302415	4	4	0	chr19:23327263-23328057	chr19:23325263-23330057	3	chr19:22100475-22101480	chr19:22098475-22103480	0	4981	4794	5005	1.05847	0.9375	0.984331	0.942017
chr2:113189945-113191071	0	chr2:113187945-113193071	4	5	0	N/A	N/A	N/A	chr13:108514332-108515071	chr13:108512332-108517071	3	5126	0	4739	1.08871	0.9375	N/A	1.1031
chr20:25128691-25129868	0	chr20:25126691-25131868	4	11	0	chr20:25497318-25498519	chr20:25495318-25500519	11	chr10:58337224-58338047	chr10:58335224-58340047	0	5177	5201	4823	1.27016	0.9375	1.25579	0.873394
chr6:7261200-7262289	0	chr6:7259200-7264289	4	2	0	chr6:7381317-7382981	chr6:7379317-7384981	3	chr4:7172730-7173831	chr4:7170730-7175831	0	5089	5664	5101	0.997984	0.9375	1.13828	0.939711
chr7:52155715-52156616	0	chr7:52153715-52158616	4	1	0	chr7:53067605-53068503	chr7:53065605-53070503	1	chr3:74289507-74290391	chr3:74287507-74292391	1	4901	4898	4884	0.967742	0.9375	0.965318	1.01918
chr8:95131744-95132792	0	chr8:95129744-95134792	4	0	0	chr8:92928992-92930052	chr8:92926992-92932052	0	chr8:96702742-96703769	chr8:96700742-96705769	0	5048	5060	5027	0.9375	0.9375	0.939729	0.9336
chr9:45441059-45442529	0	chr9:45439059-45444529	4	0	0	chr9_random:3953576-3955032	chr9_random:3951576-3957032	0	N/A	N/A	N/A	5470	5456	0	0.9375	0.9375	0.935101	N/A
chr17:28926778-28928682	0	chr17:28924778-28930682	35	12	4	chr17:26283042-26284953	chr17:26281042-26286953	26	N/A	N/A	N/A	5904	5911	0	0.876061	0.947368	1.13053	N/A
chrX:103172740-103174459	0	chrX:103170740-103176459	27	0	3	chrX:103635127-103637444	chrX:103633127-103639444	478	chrX:102461754-102463634	chrX:102459754-102465634	5	5719	6317	5880	0.689655	0.948276	11.7959	1.03137
chr1:147999796-148001095	0	chr1:147997796-148003095	3	1	0	chr1:111531077-111532372	chr1:111529077-111534372	47	chr1:126297962-126300231	chr1:126295962-126302231	0	5299	5295	6269	0.983103	0.952381	2.30706	1.12672
chr1:196866240-196867194	0	chr1:196864240-196869194	3	0	0	chr1:176815011-176815966	chr1:176813011-176817966	0	chr1:173653161-173654439	chr1:173651161-173656439	0	4954	4955	5278	0.952381	0.952381	0.952573	1.01467
chr13:27580713-27581689	0	chr13:27578713-27583689	3	0	0	chr13:26634844-26635822	chr13:26632844-26637822	0	chr17:6773017-6773969	chr17:6771017-6775969	0	4976	4978	4952	0.952381	0.952381	0.952764	0.947787
chr16:230258-231556	0	chr16:228258-233556	66	130	8	chr16:171335-172962	chr16:169335-174962	53	chr20:140379-141656	chr20:138379-143656	16	5298	5627	5277	2.47312	0.952381	1.31804	1.1642
chr17:16569886-16571001	0	chr17:16567886-16573001	3	4	0	chr17_random:2682227-2683281	chr17_random:2680227-2685281	0	N/A	N/A	N/A	5115	5054	0	1.07527	0.952381	0.941023	N/A
chr3:131245542-131246264	0	chr3:131243542-131248264	3	1	0	chr3:136045604-136046326	chr3:136043604-136048326	2	chr19:55938483-55942265	chr19:55936483-55944265	54	4722	4722	7782	0.983103	0.952381	1.0101	9.27463
chr7:138348519-138349717	0	chr7:138346519-138351717	3	1	0	chr7:139268765-139269034	chr7:139266765-139271034	0	chr3:176151334-176152323	chr3:176149334-176154323	1	5198	4269	4989	0.983103	0.952381	0.782169	0.997187
chr9:70489965-70490526	0	chr9:70487965-70492526	3	0	0	chrUn:8723303-8723852	chrUn:8721303-8725852	0	chr15:77024234-77025113	chr15:77022234-77027113	44	4561	4549	4879	0.952381	0.952381	0.949875	5.09391
chr11:102322850-102323986	0	chr11:102320850-102325986	96	78	12	chr11:101096150-101097759	chr11:101094150-101099759	26	chr14:101044458-101045583	chr14:101042458-101047583	19	5136	5609	5125	1.35236	0.961538	0.750974	1.0467
chr1:149605399-149606104	0	chr1:149603399-149608104	2	0	0	N/A	N/A	N/A	chr1:127742120-127745277	chr1:127740120-127747277	3	4705	0	7157	0.967742	0.967742	N/A	1.87355
chr2:132430252-132431809	0	chr2:132428252-132433809	2	4	0	chr2b:132474685-132476225	chr2b:132472685-132478225	24	chr10:59102596-59115336	chr10:59100596-59117336	10	5557	5540	16740	1.09261	0.967742	1.66644	5.56546
chr2:208988634-208989515	0	chr2:208986634-208991515	2	5	0	chr2b:213737723-213738604	chr2b:213735723-213740604	6	chr12:72027096-72027955	chr12:72025096-72029955	0	4881	4881	4859	1.12383	0.967742	1.1437	0.96338
chr2:69533396-69534689	0	chr2:69531396-69536689	2	0	0	chr2a:70807988-70809280	chr2a:70805988-70811280	0	chr13:69539908-69541220	chr13:69537908-69543220	0	5293	5292	5312	0.967742	0.967742	0.967559	0.971216
chr22:44991681-44992436	0	chr22:44989681-44994436	2	4	0	chr22:43747917-43748662	chr22:43745917-43750662	2	chr10:88594907-88595659	chr10:88592907-88597659	1	4755	4745	4752	1.09261	0.967742	1.02423	1.05505
chr3:197391364-197392101	0	chr3:197389364-197394101	2	4	0	chr3:203343932-203344579	chr3:203341932-203346579	1	chr6:1581780-1582424	chr6:1579780-1584424	0	4737	4647	4644	1.09261	0.967742	0.978124	0.948743
chr6:13859946-13860916	0	chr6:13857946-13862916	2	0	0	chr6:14089544-14090517	chr6:14087544-14092517	1	N/A	N/A	N/A	4970	4973	0	0.967742	0.967742	0.997669	N/A
chr6:159125223-159125799	0	chr6:159123223-159127799	2	14	0	chr6:161621625-161622201	chr6:161619625-161624201	24	chr4:104231666-104232250	chr4:104229666-104234250	0	4576	4576	4584	1.40479	0.967742	1.67155	0.969434
chr7:3339939-3340627	0	chr7:3337939-3343278	2	3	0	chr7:3252737-3253429	chr7:3250737-3255429	0	chr3:41300034-41300605	chr3:41298034-41302605	0	5339	4692	4571	1.06139	0.967742	0.850467	0.828535
chr7:3340718-3341278	0	chr7:3337939-3343278	2	3	0	N/A	N/A	N/A	N/A	N/A	N/A	5339	0	0	1.06139	0.967742	N/A	N/A
chr17:36665858-36667752	0	chr17:36663858-36669752	4176	4081	542	chr17:19061637-19063542	chr17:19059637-19065542	3969	chr16:48530689-48532635	chr16:48528689-48534635	833	5894	5905	5946	1.87883	0.973796	1.72095	1.09638
chr19:47539095-47539880	0	chr19:47537095-47541880	63	86	8	chr19:52670726-52671512	chr19:52668726-52673512	92	chr19:53362966-53363755	chr19:53360966-53365755	17	4785	4786	4789	1.84107	0.97561	1.84813	1.24272
chr2:115918003-115921686	1	chr2:115916003-115923686	124	37	16	chr2b:115689856-115693897	chr2b:115687856-115695897	52	chr13:121295558-121299200	chr13:121293558-121301200	34	7683	8041	7642	0.715288	0.978261	0.879058	1.32687
chr16:87811164-87811868	0	chr16:87809164-87813868	9	0	1	chr16:88145241-88145940	chr16:88143241-88147940	2	chr20:85915366-85915881	chr20:85913366-85917881	0	4704	4699	4515	0.869565	0.978261	0.921286	0.834627
chr2:115419442-115420562	1	chr2:115417442-115422562	24	10	3	chr2b:115178923-115180036	chr2b:115176923-115182036	17	chr13:120811160-120812267	chr13:120809160-120814267	9	5120	5113	5107	0.9447	0.982143	1.08077	1.2954
chr1:161500306-161501338	0	chr1:161498306-161503338	1	0	0	chr1:140814273-140815305	chr1:140812273-140817305	2	chr1:140101176-140102186	chr1:140099176-140104186	0	5032	5032	5010	0.983607	0.983607	1.04322	0.979306
chr1:5804474-5805338	0	chr1:5802474-5807338	1	46	0	chr1_random:8498827-8499498	chr1_random:8496827-8501498	0	chr1:8742846-8743706	chr1:8740846-8745706	1	4864	4671	4860	2.44315	0.983607	0.944578	1.07214
chr14:100196273-100197464	0	chr14:100194273-100199464	1	3	0	chr14:100109371-100110561	chr14:100107371-100112561	2	chr7:162991175-162992272	chr7:162989175-162994272	3	5191	5190	5097	1.07879	0.983607	1.04302	1.22919
chr16:46823810-46824518	0	chr16:46821810-46826518	1	2	0	chr16:46006190-46006846	chr16:46004190-46008846	2	chr20:44993237-44993872	chr20:44991237-44995872	2	4708	4656	4635	1.04707	0.983607	1.0317	1.14442
chr19:21182626-21183281	0	chr19:21180626-21185281	1	0	0	chr19:21254194-21254857	chr19:21252194-21256857	0	chr3:60680558-60681216	chr3:60678558-60683216	1	4655	4663	4658	0.983607	0.983607	0.985297	1.07372
chr2:114360693-114361342	0	chr2:114358693-114363342	1	0	0	N/A	N/A	N/A	N/A	N/A	N/A	4649	0	0	0.983607	0.983607	N/A	N/A
chr21:15399421-15400450	0	chr21:15397421-15402450	1	0	0	chr18:2359993-2360997	chr18:2357993-2362997	12	N/A	N/A	N/A	5029	5004	0	0.983607	0.983607	1.33461	N/A
chr3:157260353-157261414	0	chr3:157258353-157263414	1	1	0	chr3:162554992-162556033	chr3:162552992-162558033	1	chr2:130111536-130112589	chr2:130109536-130114589	0	5061	5041	5053	1.01534	0.983607	1.00941	0.982052
chr3:197182966-197183977	0	chr3:197180966-197185977	1	0	0	chr3:203119499-203119785	chr3:203117499-203121785	1	chr2:187952853-187953851	chr2:187950853-187955851	0	5011	4286	4998	0.983607	0.983607	0.866791	0.981055
chr4:119512806-119513481	0	chr4:119510806-119515481	1	0	0	chr1:224082134-224082778	chr1:224080134-224084778	2	N/A	N/A	N/A	4675	4644	0	0.983607	0.983607	1.0363	N/A
chr7:51538747-51540057	1	chr7:51536747-51542057	1	1	0	chr7:52419131-52420440	chr7:52417131-52422440	1	chr3:74950028-74951322	chr3:74948028-74953322	0	5310	5309	5294	1.01534	0.983607	1.01322	0.980643
chr9:68726041-68726631	0	chr9:68724041-68728631	1	0	0	chrUn:8097074-8097669	chrUn:8095074-8099669	0	chr5:181986002-181986544	chr5:181984002-181988544	84	4590	4595	4542	0.983607	0.983607	0.984678	8.40595
chr15:102035997-102037777	0	chr15:102033997-102039777	39	35	5	chr15:99561803-99563509	chr15:99559803-99565509	18	chr7:81620074-81621889	chr7:81618074-81623889	8	5780	5706	5815	1.29032	0.984848	0.924648	1.05317
chr9:66493003-66494604	0	chr9:66491003-66496604	8	0	1	chr9_random:4786537-4788701	chr9_random:4784537-4790701	0	chr15:108812609-108813487	chr15:108810609-108815487	196	5601	6164	4878	0.882353	0.992647	0.971045	14.4609
chr1:1050981-1051513	0	chr1:1048981-1053513	91	51	12	N/A	N/A	N/A	chr1:4185651-4186087	chr1:4183651-4188087	62	4532	0	4436	1.05106	0.993377	N/A	2.58111
chr4:74903741-74905039	0	chr4:74901741-74907039	23	3	3	chr4:56448940-56450239	chr4:56446940-56452239	3	chr5:55616403-55617698	chr5:55614403-55619698	2	5298	5299	5295	0.792849	0.993976	0.788758	0.853843
chr1:120834908-120835626	0	chr1:120832908-120837626	0	1	0	chr1:186599450-186600168	chr1:186597450-186602168	175	chr1:164143885-164144601	chr1:164141885-164146601	52	4718	4718	4716	1.03226	1	6.30303	5.72484
chr1:148853741-148855593	0	chr1:148851741-148857593	0	1	0	N/A	N/A	N/A	chr16:22634862-22635396	chr16:22632860-22644674	16	5852	0	11814	1.03226	1	N/A	4.95523
chr1:196847046-196847625	0	chr1:196845046-196849625	0	0	0	chr1:176795868-176796436	chr1:176793868-176798436	0	chr3:70795934-70796142	chr3:70793934-70798142	2	4579	4568	4208	1	1	0.997598	1.08606
chr10:111216259-111217267	0	chr10:111214259-111219267	0	0	0	chr10:110057249-110058257	chr10:110055249-110060257	0	chr9:109164039-109164994	chr9:109162039-109166994	2	5008	5008	4955	1	1	1	1.16931
chr10:50887238-50888019	0	chr10:50885238-50890019	0	0	0	chr10_random:7544627-7545408	chr10_random:7542627-7547408	0	chr9:46959128-46959921	chr9:46957128-46961921	0	4781	4781	4793	1	1	1	1.00251
chr11:3443264-3445081	0	chr11:3441264-3447081	0	3	0	N/A	N/A	N/A	chr20:5275962-5277704	chr20:5273694-5279862	9	5817	0	6168	1.09677	1	N/A	1.92789
chr12:10305853-10307014	0	chr12:10303853-10309014	0	0	0	chr12:10450842-10452005	chr12:10448842-10454005	0	N/A	N/A	N/A	5161	5163	0	1	1	1.00039	N/A
chr12:66134647-66135329	0	chr12:66132647-66137329	0	0	0	chr12:23711564-23712246	chr12:23709564-23714246	0	chr11:62778092-62778771	chr11:62776092-62780771	0	4682	4682	4679	1	1	1	0.999359
chr16:15247605-15248280	0	chr16:15245605-15250280	0	2	0	chr16_random:2135407-2136082	chr16_random:2133407-2138082	0	chr20:2128396-2129459	chr20:2126396-2131459	42	4675	4675	5063	1.06452	1	1	5.21807
chr16:81437162-81437875	0	chr16:81435162-81439875	0	0	0	chr16:81527197-81528552	chr16:81525197-81530552	0	chr20:79542344-79543054	chr20:79540344-79545054	0	4713	5355	4710	1	1	1.13622	0.999363
chr19:57617363-57618631	0	chr19:57615363-57620631	0	0	0	N/A	N/A	N/A	chr19:62968765-62968945	chr19:62966765-62970945	0	5268	0	4180	1	1	N/A	0.79347
chr20:62958418-62960408	0	chr20:62956418-62962408	15	1	2	chr12:74823-77125	chr12:72823-79125	265	N/A	N/A	N/A	5990	6302	0	0.825806	1	7.60053	N/A
chr22:32571550-32572412	0	chr22:32569550-32574412	0	0	0	N/A	N/A	N/A	N/A	N/A	N/A	4862	0	0	1	1	N/A	N/A
chr3:10780191-10780752	0	chr3:10778191-10782752	0	1	0	chr3:11041772-11042316	chr3:11039772-11044316	1	chr2:50288977-50289523	chr2:50286977-50291523	0	4561	4544	4546	1.03226	1	1.02646	0.996711
chr3:49577004-49578225	0	chr3:49575004-49580225	0	0	0	chr3:50715225-50716449	chr3:50713225-50718449	4	chr2:86879640-86881172	chr2:86877640-86883172	1	5221	5224	5532	1	1	1.12186	1.15589
chr4:117847021-117847738	0	chr4:117845021-117849738	0	0	0	chr4:121606534-121606899	chr4:121604534-121608899	21	chr5:109789141-109789851	chr5:109787141-109791851	1	4717	4365	4710	1	1	1.51425	1.08929
chr4:4108597-4109421	0	chr4:4106597-4111421	0	1	0	chr4:4210764-4214742	chr4:4208764-4216742	1	N/A	N/A	N/A	4824	7978	0	1.03226	1	1.70393	N/A
chr5:180586923-180587796	0	chr5:180584923-180589796	0	0	0	chr5:183658517-183659290	chr5:183656517-183661290	0	chr6:177846819-177847558	chr6:177844819-177849558	0	4873	4773	4739	1	1	0.979479	0.972502
chr6:151814563-151816291	1	chr6:151812563-151818291	0	4	0	chr6:154260104-154262016	chr6:154258104-154264016	4	chr4:111587269-111589021	chr4:111585269-111591021	1	5728	5912	5752	1.12903	1	1.15723	1.09548
chr6:17580377-17581393	0	chr6:17578377-17583393	0	3	0	chr6:17926558-17927571	chr6:17924558-17929571	3	N/A	N/A	N/A	5016	5013	0	1.09677	1	1.09026	N/A
chr7:89783335-89784314	0	chr7:89781335-89786314	0	0	0	chr7:89778386-89779365	chr7:89776386-89781365	1	chr3:127053788-127054764	chr3:127051788-127056764	0	4979	4979	4976	1	1	1.0303	0.999397
chr9:141044519-141045136	0	chr9:141042519-141047136	0	0	0	chr9:138421393-138421917	chr9:138419393-138423917	0	chr15:60039-60551	chr15:58039-62551	30	4617	4524	4512	1	1	0.979857	3.64251
chr9:42367675-42368694	0	chr9:42365675-42370694	0	1	0	N/A	N/A	N/A	chr10:60986343-60987375	chr10:60984211-60991240	23	5019	0	7029	1.03226	1	N/A	4.32875
chr9:43133791-43134308	0	chr9:43131791-43136308	0	0	0	chr2a:95750188-95750730	chr2a:95748188-95752730	45	chr10:60986940-60987456	chr10:60984211-60991240	23	4517	4542	7029	1	1	2.37672	4.80983
chr9:69065084-69065655	0	chr9:69063084-69067655	0	0	0	chr9_random:6046145-6046705	chr9_random:6044145-6048705	0	chr5:181986020-181986543	chr5:181984002-181988544	84	4571	4560	4542	1	1	0.997594	8.58157
chr9:70402915-70403488	0	chr9:70400915-70405488	0	0	0	N/A	N/A	N/A	N/A	N/A	N/A	4573	0	0	1	1	N/A	N/A
chr8:57232025-57233415	0	chr8:57230025-57235415	22	1	3	chr8:54476828-54478656	chr8:54474828-54480656	0	chr8:58919926-58921317	chr8:58917926-58923317	3	5390	5828	5391	0.755311	1.0061	0.791167	0.931437
chr7:6703439-6704410	0	chr7:6701439-6706410	7	9	1	chr7:6683263-6684216	chr7:6681263-6686216	8	chr3:44907396-44908165	chr3:44905396-44910165	0	4971	4953	4769	1.15551	1.00746	1.10859	0.859132
chr15:86162760-86164774	0	chr15:86160760-86166774	29	5	4	chr15:83264994-83267012	chr15:83262994-83269012	5	chr7:65223356-65225373	chr7:65221356-65227373	5	6014	6018	6017	0.782892	1.01124	0.776819	0.981082
chr12:8113117-8113938	0	chr12:8111117-8115938	14	2	2	chr12:8274446-8275270	chr12:8272446-8277270	3	chr11:8338089-8338910	chr11:8336089-8340910	7	4821	4824	4821	0.863121	1.01351	0.885071	1.32678
chr16:3238128-3239666	0	chr16:3236128-3241666	14	5	2	chr16:3312082-3313620	chr16:3310082-3315620	4	chr20:3321758-3323700	chr20:3319758-3325700	2	5538	5538	5942	0.941587	1.01351	0.909091	1.02813
chr5:179085438-179085971	0	chr5:179083438-179087971	14	1	2	N/A	N/A	N/A	chr6:176329887-176330422	chr6:176327887-176332422	88	4533	0	4535	0.836966	1.01351	N/A	7.30052
chr11:75140309-75142633	0	chr11:75138309-75144633	93	53	13	chr11:73802999-73805770	chr11:73800999-73807770	52	chr14:73610296-73612742	chr14:73608296-73614742	19	6324	6771	6446	1.06262	1.02941	1.0815	1.09015
chr5:68787944-68789833	0	chr5:68785944-68791833	5	5	1	chr5:46083664-46085552	chr5:46081664-46087552	6	chr6:67370736-67372585	chr6:67368736-67374585	1	5889	5888	5849	1.07196	1.03846	1.09072	1.00015
chr7:65235030-65235867	0	chr7:65233030-65237867	5	9	1	chr7:65383388-65384227	chr7:65381388-65386227	22	N/A	N/A	N/A	4837	4839	0	1.19107	1.03846	1.5391	N/A
chr13:113597319-113598620	0	chr13:113595319-113600620	4	7	1	chr13:114397054-114399320	chr13:114395054-114401320	4	chr17:93064874-93068391	chr17:93062874-93070391	3	5301	6266	7517	1.14919	1.05469	1.24249	1.69197
chr4:95678566-95680364	0	chr4:95676566-95682364	4	9	1	chr4:97837924-97840049	chr4:97835924-97842049	9	chr5:87726903-87728666	chr5:87724903-87730666	2	5798	6125	5763	1.20968	1.05469	1.26048	1.10127
chr20:326819-329498	1	chr20:324819-331498	949	473	134	chr20:307735-310347	chr20:305735-312347	502	chr10:33593892-33596556	chr10:33591892-33598556	212	6679	6612	6664	0.966783	1.0555	0.95438	1.20281
chr19:36287533-36289090	0	chr19:36285533-36291090	11	1	2	chr19:41300929-41302659	chr19:41298929-41304659	1	chr19:42271688-42273229	chr19:42269688-42275229	281	5557	5730	5541	0.872331	1.05634	0.897785	22.3682
chr1:167090344-167091105	0	chr1:167088344-167093105	3	10	1	chr1:146464095-146464847	chr1:146462095-146466847	13	chr1:196847956-196848699	chr1:196845956-196850699	2	4761	4752	4743	1.2596	1.07143	1.32505	1.12129
chr12:2144057-2145077	0	chr12:2142057-2147077	3	5	1	chr12:2123708-2124719	chr12:2121708-2126719	6	chr11:2124436-2125454	chr11:2122436-2127454	1	5020	5011	5018	1.10599	1.07143	1.12352	1.03855
chr19:49255403-49256715	0	chr19:49253403-49258715	108	19	16	chr19:54464437-54466613	chr19:54462437-54468613	20	chr19:55058885-55060188	chr19:55056885-55062188	21	5312	6176	5303	0.576037	1.07143	0.666888	1.0372
chr2:114340936-114341825	0	chr2:114338936-114343825	3	2	1	chrUn:1512527-1515664	chrUn:1510527-1517664	0	chr11:9049-9939	chr11:7049-11939	25	4889	7137	4890	1.01382	1.07143	1.39029	3.11752
chr5:95170425-95170961	0	chr5:95168425-95172961	24	5	4	chr5:19670340-19670876	chr5:19668340-19672876	5	chr6:92047599-92048137	chr6:92045599-92050137	1	4536	4536	4538	0.829493	1.07143	0.822511	0.779564
chr8:18244431-18245210	0	chr8:18242431-18247210	3	2	1	chr8:14590685-14591467	chr8:14588685-14593467	2	chr8:18280250-18281026	chr8:18278250-18283026	2	4779	4782	4776	1.01382	1.07143	1.01074	1.12483
chr9:99774900-99776336	0	chr9:99772900-99778336	3	1	1	N/A	N/A	N/A	chr15:106104197-106105710	chr15:106102197-106107710	24	5436	0	5513	0.983103	1.07143	N/A	3.07323
chr2:86947088-86948897	0	chr2:86945088-86950897	9	6	2	chr2a:88662566-88664409	chr2a:88660566-88666409	54	chr13:88327765-88329569	chr13:88325765-88331569	60	5809	5843	5804	1.03787	1.08696	2.30591	5.60782
chr11:1714556-1715423	0	chr11:1712556-1717423	2	14	1	chr11:1736328-1737170	chr11:1734328-1739170	10	chr14:1501877-1502678	chr14:1499877-1504678	1	4867	4842	4801	1.40479	1.08871	1.25452	1.0414
chr3:195716970-195717816	0	chr3:195714970-195719816	2	2	1	chr3_random:2928224-2929062	chr3_random:2926224-2931062	0	chr6:1284568-1285316	chr6:1282529-1287316	92	4846	4838	4787	1.03018	1.08871	0.966144	8.95126
chr5:177365980-177366808	0	chr5:177363980-177368808	2	0	1	chr5:178542188-178543002	chr5:178540188-178545002	2	chr6:172663396-172664129	chr6:172661396-172666129	1	4828	4814	4733	0.967742	1.08871	1.02342	1.03495
chr7:158656041-158657196	0	chr7:158654041-158659196	29	110	5	chr7:159756676-159758197	chr7:159754676-159760197	59	chr3:195923733-195924511	chr3:195921733-195926511	9	5155	5521	4778	3.06633	1.09551	2.01291	1.1361
chr3:75483539-75485728	0	chr3:75481539-75487728	15	4	3	chr3:77392406-77394632	chr3:77390406-77396632	35	chr20:5275698-5277848	chr20:5273694-5279862	9	6189	6226	6168	0.903226	1.1	1.65834	1.44961
chr18:3296725-3297700	0	chr18:3294725-3299700	1	2	1	chr18:13421362-13422309	chr18:13419362-13424309	3	N/A	N/A	N/A	4975	4947	0	1.04707	1.10656	1.06699	N/A
chr9:33001685-33002199	0	chr9:32999685-33004199	28	14	5	chr9:33638305-33638818	chr9:33636305-33640818	12	chr15:44218456-44218975	chr15:44216456-44220975	7	4514	4513	4519	0.989736	1.10795	0.929546	1.11694
chr1:159893901-159895576	0	chr1:159891901-159897576	40	24	7	chr1:139199639-139201314	chr1:139197639-139203314	21	chr1:138539064-138540705	chr1:138537064-138542705	20	5675	5675	5641	1.06452	1.125	0.981818	1.68078
chr10:86300061-86301165	0	chr10:86298061-86303165	0	1	1	chr10:84653375-84654484	chr10:84651375-84656484	1	chr9:52750675-52751777	chr9:52748675-52753777	2	5104	5109	5102	1.03226	1.125	1.03131	1.18136
chr2:113914422-113915745	0	chr2:113912422-113917745	0	4	1	chr2a:114021733-114023070	chr2a:114019733-114025070	3	chr13:112526143-112527470	chr13:112524143-112529470	1	5323	5337	5327	1.12903	1.125	1.09378	1.09173
chr22:42833456-42834248	0	chr22:42831456-42836248	0	0	1	chr22:41505178-41505968	chr22:41503178-41507968	0	chr10:86403343-86404127	chr10:86401343-86406127	1	4792	4790	4784	1	1.125	0.999583	1.08909
chr5:139742817-139743541	0	chr5:139740817-139745541	33	24	6	chr5:142117782-142118506	chr5:142115782-142120506	24	chr6:136781661-136782364	chr6:136779661-136784364	8	4724	4724	4703	1.14464	1.12903	1.11437	1.10942
chr10:4867742-4869301	0	chr10:4865742-4871301	39	7	7	chr10:4965379-4966991	chr10:4963379-4968991	6	chr9:5155038-5156557	chr9:5153038-5158557	29	5559	5612	5519	0.742913	1.13636	0.723082	2.188
chr13:31627201-31630913	1	chr13:31625201-31632913	138	205	22	chr13:30784762-30787137	chr13:30782762-30789137	179	chr17:10469246-10471999	chr17:10467246-10473999	76	7712	6375	6753	2.30694	1.13636	1.60924	2.09866
chr14:92302102-92303386	0	chr14:92300102-92305386	5	0	2	chr14:92015167-92016862	chr14:92013167-92018862	0	chr7:155046467-155047759	chr7:155044467-155049759	3	5284	5695	5292	0.923077	1.15385	0.994876	1.1766
chr15:99640318-99641123	0	chr15:99638318-99643123	5	16	2	chr15:97096493-97097273	chr15:97094493-97099273	19	chr7:79129321-79130125	chr7:79127321-79132125	0	4805	4780	4804	1.3995	1.15385	1.44698	0.922885
chr8:49647310-49648488	0	chr8:49645310-49650488	11	2	3	chr8:46716510-46717688	chr8:46714510-46719688	2	chr8:51270194-51271371	chr8:51268194-51273371	4	5178	5178	5177	0.899591	1.16197	0.896287	1.15215
chr18:904299-909734	1	chr18:902299-911734	1655	317	263	chr18:15882434-15888411	chr18:15880434-15890411	331	chr18:13191080-13196445	chr18:13189080-13198445	386	9435	9977	9365	0.39274	1.18513	0.408068	1.25329
chr14:24505336-24506200	0	chr14:24503336-24508200	3	8	2	chr14:22933268-22934127	chr14:22931268-22936127	92	chr7:86925893-86926748	chr7:86923893-86928748	7	4864	4859	4855	1.19816	1.19048	3.6038	1.55556
chr17:18313970-18315268	0	chr17:18311970-18317268	3	3	2	chr17_random:3013019-3014159	chr17_random:3011019-3016159	0	chr16:18367428-18368664	chr16:18365428-18370664	22	5298	5140	5236	1.04455	1.19048	0.923979	2.82371
chr20:5484542-5485594	1	chr20:5482542-5487594	3	3	2	chr20:5409298-5410345	chr20:5407298-5412345	4	chr10:38804361-38805405	chr10:38802361-38807405	1	5052	5047	5044	1.04455	1.19048	1.06676	1.03732
chr1:21762926-21764135	0	chr1:21760926-21769753	9	4	3	N/A	N/A	N/A	chr1:19405026-19406361	chr1:19403026-19408361	11	8827	0	5335	0.981767	1.19565	N/A	1.05112
chr1:21766143-21767753	0	chr1:21760926-21769753	9	4	3	chr1:128566300-128567930	chr1:128564300-128569930	1	chr1:19275559-19276979	chr1:19273559-19278979	8	8827	5630	5420	0.981767	1.19565	0.571429	0.922251
chr2:85645256-85646554	0	chr2:85643256-85648554	9	3	3	chr2a:87326472-87327716	chr2a:87324472-87329716	4	chr13:85987275-85988751	chr13:85985275-85990751	4	5298	5244	5476	0.953717	1.19565	0.96503	1.22561
chr20:32077040-32077768	0	chr20:32075040-32079768	15	13	4	chr20:30496504-30497232	chr20:30494504-30499232	7	N/A	N/A	N/A	4728	4728	0	1.13548	1.2	0.969697	N/A
chr20:1756900-1758101	0	chr20:1754900-1760101	241	25	41	chr20:1659500-1660571	chr20:1657500-1662571	42	chr10:35089010-35090109	chr10:35087010-35092109	83	5201	5071	5099	0.36009	1.22093	0.441712	1.67001
chr12:1738696-1740035	0	chr12:1736696-1742035	13	75	4	chr12:1706872-1708212	chr12:1704872-1710212	84	chr11:1693782-1695105	chr11:1691782-1697105	3	5339	5340	5323	2.81043	1.23288	2.91462	1.04294
chr12:10516752-10518252	0	chr12:10514752-10520252	12	11	4	chr12:10672221-10673174	chr12:10670221-10675174	6	N/A	N/A	N/A	5500	4953	0	1.12903	1.25	0.886901	N/A
chr5:64331006-64331917	0	chr5:64329006-64333917	0	2	2	chr5:50636256-50637221	chr5:50634256-50639221	3	chr6:62886632-62887580	chr6:62884632-62889580	3	4911	4965	4948	1.06452	1.25	1.1029	1.28232
chr20:62587965-62588977	0	chr20:62585965-62590977	1335	1347	226	chr20:61924735-61925653	chr20:61922735-61927653	1393	chr10:386280-387288	chr10:384280-389288	460	5012	4918	5008	1.9119	1.25806	1.82373	1.84017
chr17:36452924-36453819	0	chr17:36450924-36455819	33	18	8	chr17:19284188-19285084	chr17:19282188-19287084	5	chr16:31680992-31681890	chr16:31678992-31683890	25	4895	4896	4898	1.01977	1.29032	0.743065	2.11273
chr1:89457825-89459180	0	chr1:89455825-89461180	50	43	11	chr1:90472545-90473891	chr1:90470545-90475891	52	chr1:91727241-91728600	chr1:91725241-91730600	44	5355	5346	5359	1.30205	1.29545	1.4026	2.72931
chr1:110281938-110283632	0	chr1:110279938-110285632	2168	390	380	chr1:128047468-128049186	chr1:128045468-128051186	402	chr1:112803672-112805368	chr1:112801672-112807368	442	5694	5718	5696	0.365727	1.3061	0.356482	1.10942
chr22:27040776-27041481	1	chr22:27038776-27046983	135	15	26	chr22:25448966-25449676	chr22:25446966-25455089	20	chr10:70479230-70479947	chr10:70477230-70485446	15	8207	8123	8216	0.456576	1.30769	0.489115	0.72807
chr22:27041946-27044983	1	chr22:27038776-27046983	135	15	26	chr22:25450141-25453089	chr22:25446966-25455089	20	chr10:70480408-70483446	chr10:70477230-70485446	15	8207	8123	8216	0.456576	1.30769	0.489115	0.72807
chr13:24152621-24154467	0	chr13:24150621-24156467	3	1	3	chr13:23162050-23163878	chr13:23160050-23165878	2	chr17:3944211-3945701	chr17:3942211-3947701	3	5846	5828	5490	0.983103	1.30952	1.00699	1.13831
chr22:17516894-17518036	0	chr22:17514894-17520728	3	0	3	chr22:15895047-15896190	chr22:15893047-15900724	0	chr10:61558923-61560082	chr10:61556923-61562808	21	5834	7677	5885	0.952381	1.30952	1.25324	2.79478
chr22:17518180-17518728	0	chr22:17514894-17520728	3	0	3	chr22:15896334-15898724	chr22:15893047-15900724	0	chr10:61560226-61560808	chr10:61556923-61562808	21	5834	7677	5885	0.952381	1.30952	1.25324	2.79478
chr11:857728-860564	1	chr11:855728-862564	173	548	33	chr11:928555-931804	chr11:926555-933804	601	chr14:670261-673044	chr14:668261-675044	240	6836	7249	6783	4.80964	1.31974	5.24622	5.83037
chr10:46992584-46994081	0	chr10:46990584-46996081	1	1	3	chr10:46717237-46719373	chr10:46715237-46721373	1	chr9:49491065-49492553	chr9:49489065-49494553	10	5497	6136	5488	1.01534	1.35246	1.13122	1.87472
chr18:61603216-61604434	0	chr18:61601216-61606434	1	3	3	chr18:60481182-60482402	chr18:60479182-60484402	3	chr18:57284822-57286341	chr18:57282822-57288341	5	5218	5220	5519	1.07879	1.35246	1.07344	1.51323
chr13:44716403-44717115	0	chr13:44714403-44719115	55	22	13	chr13_random:6625878-6626575	chr13_random:6623878-6628575	0	chr17:23061792-23062441	chr17:23059792-23064441	31	4712	4697	4649	0.892006	1.36957	0.520078	1.96546
chr2:3306798-3307513	0	chr2:3304798-3309513	22	39	7	chr2a:4898741-4899456	chr2a:4896741-4901456	57	N/A	N/A	N/A	4715	4715	0	1.65224	1.37195	1.99557	N/A
chr20:44098178-44099796	0	chr20:44096178-44101796	108	39	23	chr20:42825940-42827562	chr20:42823940-42829562	38	chr10:18975866-18977470	chr10:18973866-18979470	39	5618	5622	5604	0.806452	1.38393	0.768945	1.61933
chr18:74842845-74845340	0	chr18:74840845-74847340	32	21	9	chr18:74058071-74060938	chr18:74056071-74062938	19	chr18:70582027-70584558	chr18:70580027-70586558	12	6495	6867	6531	1.09397	1.38587	1.08653	1.37119
chr4:119186277-119187242	0	chr4:119184277-119189242	10	0	5	chr4:121836303-121837279	chr4:121834303-121839279	0	chr5:111109861-111110070	chr5:111107861-111112070	8	4965	4976	4209	0.857143	1.39286	0.859042	1.25509
chr3:128399073-128400519	0	chr3:128397073-128402519	53	31	13	chr3:133106174-133107651	chr3:133104174-133109651	38	chr11:86157350-86158788	chr11:86155350-86160788	47	5446	5477	5438	1.06195	1.39381	1.1489	2.79557
chr5:82768137-82770681	0	chr5:82766137-82772681	47	18	12	chr5:32172517-32175068	chr5:32170517-32177068	18	chr6:79660241-79662797	chr6:79658241-79664797	12	6544	6551	6556	0.886343	1.40187	0.867537	1.17462
chr9:100684117-100685303	0	chr9:100682117-100687303	14	14	6	chr9:97131870-97133054	chr9:97129870-97135054	19	chr15:38306171-38307326	chr15:38304171-38309326	11	5186	5184	5155	1.17698	1.41892	1.27715	1.61193
chr3:128745602-128746646	0	chr3:128743602-128748646	23	6	8	chr3:133460361-133461414	chr3:133458361-133463414	7	chr11:85825774-85826776	chr11:85823774-85828776	22	5044	5053	5002	0.862806	1.44578	0.877796	2.15062
chr16:2204504-2205607	0	chr16:2202504-2207607	2208	1623	430	chr16:2251444-2252740	chr16:2249444-2254740	1653	chr20:2147940-2149054	chr20:2145940-2151054	743	5103	5296	5114	1.4115	1.44841	1.40273	1.81728
chr15:28699807-28700396	0	chr15:28697807-28702396	1	1	4	chr15:25986830-25987433	chr15:25984830-25989433	10	chr19:1651464-1652030	chr19:1649464-1654030	749	4589	4603	4566	1.01534	1.47541	1.28558	67.6177
chr17:34998105-34998851	0	chr17:34996105-35000851	1	7	4	chr17:20787095-20787841	chr17:20785095-20789841	6	chr16:46622313-46623059	chr16:46620313-46625059	6	4746	4746	4746	1.20571	1.47541	1.16244	1.52012
chr9:115817818-115819576	0	chr9:115815818-115821576	72	64	18	chr9_random:2085011-2086769	chr9_random:2083011-2088769	0	chr15:23069321-23071079	chr15:23067321-23073079	38	5758	5758	5758	1.39296	1.47727	0.454545	2.02479
chr20:708451-709589	0	chr20:706451-711589	0	29	4	chr20:699943-701084	chr20:697943-703084	32	chr10:33999880-34001033	chr10:33997880-34003033	7	5138	5141	5153	1.93548	1.5	1.97085	1.64114
chr3:27673956-27675021	0	chr3:27671956-27677021	164	24	38	chr3:28266907-28267966	chr3:28264907-28269966	24	N/A	N/A	N/A	5065	5059	0	0.47523	1.54018	0.462114	N/A
chr4:106816076-106818033	0	chr4:106814076-106820033	12	5	7	chr4:109268652-109270608	chr4:109266652-109272608	9	chr5:98943882-98945841	chr5:98941882-98947841	9	5957	5956	5959	0.967742	1.5625	1.06043	1.51566
chr10:72237851-72239407	0	chr10:72235851-72241407	6	32	6	chr10:69571823-69573217	chr10:69569823-69575217	28	chr9:66528365-66529921	chr9:66526365-66531921	7	5556	5394	5556	1.84751	1.59091	1.63144	1.4876
chr7:21984997-21985856	0	chr7:21982997-21987856	5	4	6	chr7:22235893-22236752	chr7:22233893-22238752	3	chr3:104251509-104252368	chr3:104249509-104254368	9	4859	4859	4859	1.04218	1.61538	1.00699	1.67832
chr3:186542092-186545903	0	chr3:186540092-186547903	169	93	42	chr3:192407593-192411474	chr3:192405593-192413474	125	chr2:179176446-179180260	chr2:179174446-179182260	151	7811	7881	7814	1.04803	1.63755	1.26571	3.86016
chr22:21056117-21057599	0	chr22:21054117-21059599	80	75	23	chr22:19418634-19420538	chr22:19416634-19422538	86	chr10:65215113-65216589	chr10:65213113-65218589	518	5482	5904	5476	1.46544	1.66071	1.66442	20.5878
chr5:167002144-167003174	0	chr5:167000144-167005174	39	301	15	chr5:169801188-169802219	chr5:169799188-169804219	304	chr6:163935859-163936889	chr6:163933859-163938889	14	5030	5031	5030	6.49071	1.74242	6.19039	1.37741
chr20:18774665-18775360	0	chr20:18772665-18777360	103	61	32	chr20:19002572-19003272	chr20:19000572-19005272	68	chr10:52123222-52124217	chr10:52121222-52126217	72	4695	4700	4995	1.09242	1.84049	1.1278	2.95494
chr17:8059986-8060595	0	chr17:8057986-8062595	609	1145	161	chr17:48354569-48355204	chr17:48352569-48357204	57	chr16:7916699-7917315	chr16:7914699-7919315	1055	4609	4635	4616	3.40229	1.89462	0.245978	8.7046
chr2:133013886-133016107	1	chr2:133011886-133018107	14619	10478	3721	N/A	N/A	N/A	chr20:30449024-30450154	chr20:30447024-30452154	8816	6221	0	5130	1.38565	1.90527	N/A	2.70478
chr18:73627743-73628887	1	chr18:73625743-73630887	30	1	15	chr18:72807334-72809090	chr18:72805334-72811090	0	chr18:69378177-69379972	chr18:69376177-69381972	38	5144	5756	5795	0.688172	1.91667	0.745982	3.34553
chr11:70669796-70671867	0	chr11:70667796-70673867	9	16	10	chr11:69140914-69143108	chr11:69138914-69145108	17	chr14:3941938-3943579	chr14:3939938-3945579	9	6071	6194	5641	1.31837	1.95652	1.34422	1.46905
chr18:3930513-3931691	0	chr18:3928513-3933691	10	11	12	chr18:12760201-12761378	chr18:12758201-12763378	13	chr18:10264229-10265427	chr18:10262229-10267427	17	5178	5177	5198	1.16129	2.14286	1.19457	2.19025
chr5:157097657-157099145	0	chr5:157095657-157101145	17	2	14	chr5:159701501-159702962	chr5:159699501-159704962	2	chr6:154058226-154059713	chr6:154056226-154061713	31	5488	5461	5487	0.829493	2.14286	0.82238	2.97466
chr19:50304930-50306391	0	chr19:50302930-50308391	3278	3024	961	chr19:55541832-55543289	chr19:55539832-55545289	2980	chr19:56085284-56086747	chr19:56083284-56088747	1134	5461	5457	5463	1.77139	2.1772	1.63995	1.8717
chr6:27729848-27730752	0	chr6:27727848-27732752	113	164	45	chr6:28277755-28278662	chr6:28275755-28280662	103	chr4:27544150-27544886	chr4:27542150-27546886	105	4904	4907	4736	2.18161	2.29769	1.4302	3.53209
chr15:66678282-66679163	0	chr15:66676282-66681163	360	301	125	chr15:64057774-64058658	chr15:64055774-64060658	361	chr7:44912197-44913091	chr7:44910197-44915091	303	4881	4884	4894	1.52995	2.375	1.70668	4.08878
chr6:710526-711651	0	chr6:708526-713651	28	8	20	chr6:673496-674628	chr6:671496-676628	9	chr4:570139-571289	chr4:568139-573289	65	5125	5132	5150	0.857771	2.38636	0.868954	4.73372
chr19:663340-664068	0	chr19:661340-666068	62	87	31	chr19:581835-582535	chr19:579835-584535	71	chr19:403687-404418	chr19:401687-406418	31	4728	4700	4731	1.87203	2.39754	1.54075	1.87899
chr10:103329141-103331397	1	chr10:103327141-103333397	61	22	33	chr10:101935251-101937874	chr10:101933251-101939874	18	chr9:101193813-101196096	chr9:101191813-101198096	60	6256	6623	6283	0.847774	2.54132	0.811297	3.21441
chr21:48054820-48055483	0	chr21:48052820-48057483	363	239	147	chr21:46318224-46318889	chr21:46316224-46320889	216	chr3:156863-157534	chr3:154863-159534	203	4663	4665	4671	1.23542	2.74823	1.07074	2.76424
chr10:3827721-3828451	0	chr10:3825721-3830451	79	56	47	chr10:3908505-3909395	chr10:3906505-3911395	52	chr9:4068364-4069138	chr9:4066364-4071138	52	4730	4890	4774	1.21142	2.96763	1.14945	2.4952
chr7:64029652-64030974	0	chr7:64027652-64032974	72	83	61	N/A	N/A	N/A	chr19:57418634-57425266	chr19:57416634-57427266	475	5322	0	10632	1.67155	3.92045	N/A	40.12
chr20:247305-247982	0	chr20:245305-249982	0	9	26	chr20:220671-221348	chr20:218671-223348	10	chr10:33491330-33492028	chr10:33489330-33494028	0	4677	4677	4698	1.29032	4.25	1.30303	1.00449
chr15:93276962-93277916	0	chr15:93274962-93279916	92	72	90	chr15:90540437-90541383	chr15:90538437-90543383	60	N/A	N/A	N/A	4954	4946	0	1.31154	4.83553	1.11064	N/A
chr1:15929333-15930617	0	chr1:15927333-15932617	67	23	81	chr1:15801945-15803208	chr1:15799945-15805208	5	chr1:18391224-18391673	chr1:18389224-18393673	10	5284	5263	4449	0.822962	5.25591	0.541861	0.759405
chr11:1330956-1331828	0	chr11:1328956-1333828	166	231	157	chr11:1349794-1350671	chr11:1347794-1352671	37	chr14:1090212-1090993	chr14:1088212-1092993	148	4872	4877	4781	2.24379	5.47566	0.563732	3.76581
chr17:20943969-20944714	0	chr17:20941969-20946714	167	129	183	chr17:35232429-35233452	chr17:35230429-35235452	6	chr16:20195889-20196681	chr16:20193889-20198681	216	4745	5023	4792	1.36422	6.31057	0.330676	5.50857
chr6:2764874-2765481	0	chr6:2762874-2767481	177	325	215	chr6:2777673-2778270	chr6:2775673-2780270	266	chr4:2639381-2639964	chr4:2637381-2641964	254	4607	4597	4583	2.90731	7.05696	2.28885	6.06719
chr10:57361526-57362143	0	chr10:57359526-57364143	6	142	244	chr10:54446483-54447091	chr10:54444483-54449091	5	chr9:81712309-81712407	chr9:81710309-81714407	1	4617	4608	4098	5.07331	28.6364	1.04479	0.880254
